# Supplementary material for: Contribution of physician assistants/associates to secondary care: a systematic review
Source: PubMed Central journal article supplement (PMC6020983; doi:10.1136/bmjopen-2017-019573), 2018-06-19
Supplement: bmjopen-2017-019573.draft_revisions.pdf [file bmjopen-2017-019573.draft_revisions.pdf]

# BMJ Open

BMJ Open is committed to open peer review. As part of this commitment we make the peer review history of every article we publish publicly available.

When an article is published we post the peer reviewers' comments and the authors' responses online. We also post the versions of the paper that were used during peer review. These are the versions that the peer review comments apply to.

The versions of the paper that follow are the versions that were submitted during the peer review process. They are not the versions of record or the final published versions. They should not be cited or distributed as the published version of this manuscript.

BMJ Open is an open access journal and the full, final, typeset and author-corrected version of record of the manuscript is available on our site with no access controls, subscription charges or pay-per-view fees (<http://bmjopen.bmj.com>).

If you have any questions on BMJ Open's open peer review process please email [info.bmjopen@bmj.com](mailto:info.bmjopen@bmj.com)

# BMJ Open

## The contribution of physician assistants to secondary care: a systematic review

|                               |                                                                                                                                                                                                                                                                                                                                                                                                                                                                                                                                                                                                                                                                                                                                                                                                                                                                                                                                                                                                                                                                                                                           |
|-------------------------------|---------------------------------------------------------------------------------------------------------------------------------------------------------------------------------------------------------------------------------------------------------------------------------------------------------------------------------------------------------------------------------------------------------------------------------------------------------------------------------------------------------------------------------------------------------------------------------------------------------------------------------------------------------------------------------------------------------------------------------------------------------------------------------------------------------------------------------------------------------------------------------------------------------------------------------------------------------------------------------------------------------------------------------------------------------------------------------------------------------------------------|
| Journal:                      | <i>BMJ Open</i>                                                                                                                                                                                                                                                                                                                                                                                                                                                                                                                                                                                                                                                                                                                                                                                                                                                                                                                                                                                                                                                                                                           |
| Manuscript ID                 | bmjopen-2017-019573                                                                                                                                                                                                                                                                                                                                                                                                                                                                                                                                                                                                                                                                                                                                                                                                                                                                                                                                                                                                                                                                                                       |
| Article Type:                 | Research                                                                                                                                                                                                                                                                                                                                                                                                                                                                                                                                                                                                                                                                                                                                                                                                                                                                                                                                                                                                                                                                                                                  |
| Date Submitted by the Author: | 28-Sep-2017                                                                                                                                                                                                                                                                                                                                                                                                                                                                                                                                                                                                                                                                                                                                                                                                                                                                                                                                                                                                                                                                                                               |
| Complete List of Authors:     | <p>Halter, Mary; St Georges University Hospital, Faculty of Health and Social Care Sciences</p> <p>Wheeler, Carly; Kingston University Faculty of Health Social Care and Education, Centre for Health and Social Care Research</p> <p>Pelone, Ferruccio; Royal College of Obstetricians and Gynaecologists, National Guidelines Alliance</p> <p>Gage, Heather; University of Surrey, School of Economics</p> <p>de Lusignan, Simon; University of Surrey, Department of Health Care Management and Policy; St. Georges University of London, Division of Population Health Sciences and Education</p> <p>Parle, Jim; University of Birmingham, Institute of Clinical Sciences</p> <p>Grant, Robert; Kingston University Faculty of Health Social Care and Education, Centre for Health and Social Care Research</p> <p>Gabe, Jonathan; Royal Holloway, University of London, Criminology and Sociology</p> <p>Nice, Laura; University of Birmingham, Institute of Clinical Sciences</p> <p>Drennan, Vari; Kingston University Faculty of Health Social Care and Education, Centre for Health and Social Care Research</p> |
| Keywords:                     | GENERAL MEDICINE (see Internal Medicine), Quality in health care < HEALTH SERVICES ADMINISTRATION & MANAGEMENT, ORTHOPAEDIC & TRAUMA SURGERY, Physician Assistant                                                                                                                                                                                                                                                                                                                                                                                                                                                                                                                                                                                                                                                                                                                                                                                                                                                                                                                                                         |
|                               |                                                                                                                                                                                                                                                                                                                                                                                                                                                                                                                                                                                                                                                                                                                                                                                                                                                                                                                                                                                                                                                                                                                           |

SCHOLARONE™  
Manuscripts

1  
2  
3  
4  
5  
6  
7  
8  
9  
10  
11  
12  
13  
14  
15  
16  
17  
18  
19  
20  
21  
22  
23  
24  
25  
26  
27  
28  
29  
30  
31  
32  
33  
34  
35  
36  
37  
38  
39  
40  
41  
42  
43  
44  
45  
46  
47  
48  
49  
50  
51  
52  
53  
54  
55  
56  
57  
58  
59  
60

1 **The contribution of physician assistants to secondary care: a systematic review**

2

3 **Authors**

4 *Corresponding author*

5 Halter M, PhD

6 Faculty of Health, Social Care and Education

7 Kingston University and St George's, University of London

8 Cranmer Terrace

9 London SW17 0RE

10 00 44 (0)20 8725 0337

11 [m.halter@sgul.kingston.ac.uk](mailto:m.halter@sgul.kingston.ac.uk)

12 ORCID: 0000-0001-6636-0621

13

14 Wheeler C, PhD

15 Faculty of Health, Social Care and Education, Kingston University and St George's,

16 University of London, London UK

17

18 Pelone F, PhD

19 National Guideline Alliance, Royal College of Obstetricians and Gynaecologists, London UK

1  
2  
3 20 Gage H, PhD  
4

5  
6 21 School of Economics, University of Surrey, Guildford, UK  
7

8  
9 22  
10

11  
12 23 de Lusignan S, MD, FRCGP  
13

14  
15 24 Department of Clinical and Experimental Medicine, University of Surrey, Guildford, UK  
16

17  
18 25  
19

20  
21 26 Parle J, MD, FRCGP  
22

23  
24 27 Institute of Clinical Sciences, University of Birmingham, Birmingham, UK  
25

26  
27 28  
28

29  
30 29 Grant R, MSc  
31

32  
33 30 Faculty of Health, Social Care and Education, Kingston University and St George's,  
34

35  
36 31 University of London, London UK  
37

38  
39 32  
40

41  
42 33 Gabe J, PhD  
43

44  
45 34 Centre for Criminology & Sociology/ Centre for Public Services and Policy, Royal  
46

47  
48 35 Holloway, University of London, Egham, UK  
49

50  
51 36  
52

53  
54 37 Nice L, PhD  
55

56  
57 38 Institute of Clinical Sciences, University of Birmingham, Birmingham, UK  
58

1  
2  
3  
4  
5  
6  
7  
8  
9  
10  
11  
12  
13  
14  
15  
16  
17  
18  
19  
20  
21  
22  
23  
24  
25  
26  
27  
28  
29  
30  
31  
32  
33  
34  
35  
36  
37  
38  
39  
40  
41  
42  
43  
44  
45  
46  
47  
48  
49  
50  
51  
52  
53  
54  
55  
56  
57  
58  
59  
60

39 Drennan VM, PhD

40 Faculty of Health, Social Care and Education, Kingston University and St George's,  
41 University of London, London UK

42

43 **Word count:** 4837

44

For peer review only

1  
2  
3 45 **ABSTRACT**  
4

5 46 **Objective:** to appraise and synthesise research on physician assistants/associates' impact in acute,  
6  
7 47 care of the elderly and emergency medicine; trauma and orthopaedics and mental health.  
8  
9

10 48 **Design** Systematic review  
11

12  
13 49 **Setting:** Electronic databases (Medline, Embase, ASSIA, CINAHL, SCOPUS, PsycINFO, Social  
14  
15 50 Policy and Practice, EconLit and Cochrane database), reference lists and related articles.  
16

17  
18 51 **Included articles:** Peer reviewed articles of any study design, published in English, 1995 to 2015.  
19

20 52 **Interventions:** Blinded parallel processes were used for screening abstracts and full text, data  
21  
22 53 extractions and quality assessments against published guidelines. A narrative synthesis was  
23  
24 54 undertaken.  
25

26  
27 55 **Outcome measures:** Impact on patients' experience and outcomes, service organisation, working  
28  
29 56 practices, other professional groups and costs.  
30

31  
32 57 **Results:** 4267 references were identified and 127 read in full; 11 were included - emergency  
33  
34 58 medicine (six), trauma and orthopaedics (four), internal (acute) medicine (one) and care of  
35  
36 59 the elderly or mental health (none). All studies were observational, with variable  
37  
38 60 methodological quality.  
39

40  
41 61 In emergency medicine and trauma and orthopaedics, when PAs are added to teams, reduced waiting  
42  
43 62 and process times, lower charges and acceptability to staff and patients are reported. Analgesia  
44  
45 63 prescribing, operative complications and mortality outcomes were variable. In internal medicine  
46  
47 64 outcomes of care provided by PAs and doctors were equivalent.  
48

49 65 **Conclusions:** The review suggests PAs can be used well to increase the capacity of a team, enabling  
50  
51 66 time, throughput, continuity and medical cover gains. When comparing PAs to medical staff  
52  
53 67 reassuringly little or no effect on health outcomes or cost is observed. The difficulty of attributing  
54  
55 68 cause and effect in complex systems where work is organised in teams is highlighted. Rigorous  
56  
57  
58

1  
2  
3 69 evaluation is required to addresses the complexity of the PA role, reporting on more than one setting  
4  
5 70 and including comparison between PAs and roles for which they are substituting.  
6  
7  
8 71

9  
10 72 **Strengths and limitations of this study**  
11  
12

- 13 73 • This study systematically analyses the empirical evidence for the contribution of  
14  
15 74 physician associates to secondary care, following international guidelines  
16  
17 75 • It focuses on specialties in which physician associates are increasingly deployed in the  
18  
19 76 UK, while aiming for international applicability.  
20  
21 77 • It highlights the limitations in quality in the current literature, but presents a picture for  
22  
23 78 clinical decision makers of where physician associates could add value.  
24  
25  
26  
27  
28  
29  
30 80

1  
2  
3 81 **THE CONTRIBUTION OF PHYSICIAN ASSISTANTS TO SECONDARY CARE: A**  
4  
5 82 **SYSTEMATIC REVIEW**  
6  
7  
8  
9

10  
11 84 **Introduction**  
12  
13

14 85 Health care systems internationally face medical workforce challenges. [1] An approach used  
15  
16 86 in many countries has been to develop of advanced clinical practitioner roles (also sometimes  
17  
18 87 known as mid-level non-physician clinicians), who undertake some of the activities of  
19  
20 88 doctors. [2] One of these roles is the physician assistant. Physician assistants (PAs), were  
21  
22 89 first developed, by physicians, in the 1960s in the United States (US) in response to medical  
23  
24 90 shortages in certain specialties and regions.[3] Today approximately 93,000 PAs practice in  
25  
26 91 the US[4] as nationally certified and state-licensed medical professionals in healthcare teams  
27  
28 92 with physicians and other providers in all 50 states[5] Over the last two decades other  
29  
30 93 countries have been introducing PAs into their health workforce, including Australia, Canada,  
31  
32 94 Germany, Ghana, India, Kenya, the Netherlands, Saudi Arabia, South Africa, Taiwan, and the  
33  
34 95 UK,[6] where they are known as physicians associates. Some countries have national or  
35  
36 96 federal policy commitments to develop PA education programmes and significantly increase  
37  
38 97 their availability,[7,8] while others are determining the value of such roles through  
39  
40 98 demonstration projects.[9] The majority of PAs are employed in hospital settings.[10-12]  
41  
42 99 However, like many aspects of workforce innovation and change, there is very limited  
43  
44 100 published evidence as to the contribution and impact PAs have within this setting.  
45  
46  
47  
48

49 101 Existing systematic reviews of the contribution PAs make to health care have consider  
50  
51 102 evidence from primary and secondary care together [13] just primary care, [14] or rural  
52  
53 103 healthcare and emergency department [15] with no publications included after 2010. Given  
54  
55  
56  
57  
58



1  
2  
3 104 the recent trends to utilise PAs internationally in secondary care, our purpose in conducting  
4  
5 105 this new review was to fill this gap in current evidence.  
6  
7  
8 106 The objective of the review was to appraise and synthesise the published literature on the  
9  
10 107 impact of physician associates on patient experience and outcomes, service organisation,  
11  
12 108 working practices, other professional groups and cost. The review was bounded by  
13  
14 109 consideration of the secondary care specialties in which PAs were most frequently reported  
15  
16 110 as employed in the UK. Using the annual 2016 UK Association of Physician Associates  
17  
18 111 Census (n=150 PA respondents),[16] four specialties with relatively larger numbers of PAs  
19  
20 112 replying to the survey were clearly identifiable: acute medicine (n=23), emergency medicine  
21  
22 113 (n=23), care of the elderly (n=12) and trauma and orthopaedics (n=10). While three other  
23  
24 114 specialties (cardiology, neurology and general surgery) reported five PAs in each, we selected  
25  
26 115 mental health as our fifth specialty to explore, with four PAs reported,[16] to provide a  
27  
28 116 contrast to the focus on physical health in the other four specialties selected. The  
29  
30 117 concentration of PAs in these clinical areas is consistent with evidence from other European  
31  
32 118 countries developing a PA workforce.[17] The review is intended to inform clinicians and  
33  
34 119 managers considering innovation and change in their secondary care workforce.  
35  
36  
37  
38  
39  
40

## 121 **METHODS**

### 123 **Search strategy**

124 This systematic review was designed and reported to meet international guidelines: the  
125 Preferred Reporting Items for Systematic Reviews and Meta-Analyses (PRISMA).[18] Full  
126 details of the overall search strategy can be found in the research protocol, registered with

1  
2  
3 127 International Prospective Register of Systematic Reviews (PROSPERO),  
4  
5 128 CRD42016032895.[19]  
6  
7 129 Studies addressing the research question were identified by systematic searching for  
8  
9 130 keywords in the following electronic databases: Medline (Ovid), Embase (Ovid), Applied  
10  
11 131 Social Sciences Index and Abstracts (ASSIA), Cumulative Index to Nursing and Allied  
12  
13 132 Health Literature (CINAHL) Plus (EBSCO), SCOPUS –V.4 (Elsevier), PsycINFO, Social  
14  
15 133 Policy and Practice (Ovid), EconLit (EBSCO), and Cochrane Central Register of Controlled  
16  
17 134 Trials (CENTRAL) from the beginning of January 1995 to the 2<sup>nd</sup> week of December 2015.  
18  
19 135 No language or publication status restrictions were imposed at the electronic search strategy  
20  
21 136 stage. We present the Medline search strategy, and the definitions of the MeSH terms  
22  
23 137 employed, in Supplementary file 1.  
24  
25 138 In addition, we used ‘lateral searching’ techniques[20] including checking reference lists of  
26  
27 139 systematic reviews identified at the abstract screening stage and papers selected for inclusion  
28  
29 140 after full text reading; using the ‘Cited by’ option on Scopus, and the ‘Related articles’ option  
30  
31 141 on PubMed and tracking citations.  
32  
33  
34  
35

142

### 143 **Inclusion criteria and study selection**

144 Relevant studies were selected according to eligibility criteria using a two-step screening  
145 process: 1) title and abstract screening; and 2) full-text screening. First, two authors (CW and  
146 FP) in parallel sifted titles and abstracts of all the articles resulting from the searches to  
147 ascertain their potential relevance, with disagreements resolved by a third author (MH or  
148 VMD). All the full-texts of the potentially relevant citations were further examined in parallel  
149 by two authors (pairings amongst CW, FP, or MH) to analyse whether they met all the  
150 inclusion criteria. Disagreements were resolved by peer discussion and a third view from the  
151 project lead (VMD) if required.

1  
2  
3 152 Peer-reviewed articles were considered for analysis if they fitted the following inclusion  
4  
5 153 criteria:  
6  
7 154 • Population: Physician Associates (PAs) according to the UK definition [21]  
8  
9 155 • Intervention: The implementation of PAs in the following secondary health care  
10  
11 156 specialties: acute medicine, care of the elderly, emergency medicine, mental health, and  
12  
13 157 trauma and orthopaedics (see supplementary file 2 for the definitions used).  
14  
15  
16 158 • Comparison: The comparison group was any health care professional to whom PAs were  
17  
18 159 compared.  
19  
20 160 • Outcome: Any measure of impact, informed by recognised dimensions of quality -  
21  
22 161 effectiveness, efficiency, acceptability, access, equity and relevance.[22]  
23  
24  
25 162 • Study design: Any study design that allowed measurement of impact of PAs in a primary  
26  
27 163 study.  
28

29 164

### 31 165 **Screening exclusion criteria**

32  
33 166 Articles were excluded if they did not fulfil one or more inclusion criteria or if they: 1) were  
34  
35 167 not published in the English language, 2) reported on PAs working in countries that are not  
36  
37 168 defined by the International Monetary Fund as advanced economies;[22] 3) did not report  
38  
39 169 empirical findings or were published only in abstract form; 4) presented their results for PAs  
40  
41 170 in an amalgamated form with the results for other professions/mid-level providers or did not  
42  
43 171 describe the specialties they were reporting on; 5) contained only descriptive accounts of PA  
44  
45 172 demography, workload, clinical practice or productivity or PA self-report of any aspect of  
46  
47 173 their role; 6) focused on and measured an intervention delivered by PAs rather than PAs as  
48  
49 174 the intervention; 7) focused on and measured PA clinical practice or productivity before and  
50  
51 175 after a service redesign or educational intervention; 8) focused solely on educational  
52  
53  
54  
55  
56  
57  
58  
59  
60

176 processes; and 9) presented literature reviews, commentaries, and/or non-peer-reviewed  
177 articles.

178

### 179 **Data collection and quality assessment**

180 Two authors (pairings amongst FP, CW and MH) independently extracted the data from  
181 selected papers, with any disagreement resolved through discussion. A checklist was used to  
182 extract the following information from the selected papers: 1) general characteristics of  
183 studies and 2) results, limitations and conclusions as noted by authors and reviewers.

184 The same author pairings appraised the quality of included studies using the QualSyst quality  
185 checklists for quantitative and qualitative studies, [25] with additional questions from the  
186 Mixed Methods Appraisal Tool [26] where appropriate. For the quantitative studies, 12 items  
187 (table 3a) were scored depending on the degree to which the specific criteria were met (“yes”  
188 = 2, “partial” = 1, “no” = 0). Scores for the qualitative studies were calculated in a similar  
189 fashion, based on the scoring of ten items. Any items not applicable to a particular study  
190 design were marked “n/a” and were excluded from the calculation of the summary score. No  
191 study was excluded on the basis of its quality score; the limitations of lower quality evidence  
192 are however explored in considering how much weight can be given to the evidence when we  
193 synthesise studies. [27]

194

### 195 **Data analysis**

196 A meta-analysis was not performed due to the heterogeneity of the included studies in terms  
197 of scope and outcomes investigated. Therefore, narrative synthesis was undertaken [28]  
198 conducted against the four elements in guidance on the conduct of narrative synthesis in  
199 systematic reviews [29, 30]: developing a theory of how the intervention works, why and for  
200 whom; developing a preliminary synthesis of findings of included studies; exploring

1  
2  
3 201 relationships within and between studies; assessing the robustness of the synthesis (through  
4  
5 202 formal quality assessment as well as reflection). For the synthesis the included studies were  
6  
7 203 grouped into specialty (that is, acute medicine, care of the elderly, emergency medicine,  
8  
9 204 mental health and trauma and orthopaedics) and then sub-grouped into the outcomes they  
10  
11 205 measured.

12  
13 206

## 14 207 **RESULTS**

15 208

### 16 209 **Search results**

17  
18  
19  
20  
21 210 The overall search strategy identified 4,267 references, from which we selected 136 articles  
22  
23 211 for more detailed reading. Figure 1 presents the PRISMA flowchart, illustrating the literature  
24  
25 212 search and selection process, and reasons for study exclusion on full text reading. A total of  
26  
27 213 11 articles were included for data collection, quality appraisal and data analysis.

28  
29 214 A summary of the included evidence is presented below in three subsections: characteristics  
30  
31 215 of included studies, methodological quality, and synthesis of findings on the impact of PAs.

32 216

### 33 217 **Characteristics of included studies**

34  
35 218 Table 1 presents the characteristics for each study in terms of the specialties they were drawn  
36  
37 219 from.

220 **Table 1: Characteristics of studies included in full – studies presenting comparisons of PAS with other health care professionals**

221

| Specialty          | Aim(s)                                                                                                     | Study Setting                                                                                            | Intervention                                                                                                                                                                                                               | Comparison                                                                                                                              | Participants                                                                                                                                                                       | Study design              | Outcome measures                                                                                                                                        | First author and year |
|--------------------|------------------------------------------------------------------------------------------------------------|----------------------------------------------------------------------------------------------------------|----------------------------------------------------------------------------------------------------------------------------------------------------------------------------------------------------------------------------|-----------------------------------------------------------------------------------------------------------------------------------------|------------------------------------------------------------------------------------------------------------------------------------------------------------------------------------|---------------------------|---------------------------------------------------------------------------------------------------------------------------------------------------------|-----------------------|
| Emergency medicine | To determine whether PAs are an appropriate option for providing services rendered by physicians in the ED | USA<br>Walk in urgent care facility (satellite of an inner-city teaching hospital level 1 trauma centre) | PAs (n=5) rotate from the ED. PAs work solo from 08.00- 12.00. No written diagnostic or therapeutic guidelines were followed.                                                                                              | 25 physicians rotate from the ED. Physicians work solo from 17.00-21.00. No written diagnostic or therapeutic guidelines were followed. | n= 5345 (seen by PAs)<br>n = 4256 (seen by physicians)<br>during times of single coverage<br>June 1995-June 1996                                                                   | Comparative retrospective | <ul style="list-style-type: none"> <li>• Length of visit</li> <li>• Total charge</li> </ul>                                                             | Arnopolin 2000[31]    |
| Emergency medicine | To examine the impact of PAs and nurse practitioners in EDs                                                | Canada<br>Six community hospitals with ED volumes between 23 and 66,000                                  | PAs were introduced as an unregulated provider without medical directives and worked under the supervision of a registered physician who was responsible for all patient care on predetermined busiest periods for each ED | Baseline two weeks                                                                                                                      | All ED patients:<br>Baseline n=9,585; two week period six months post implementation June 2007 n=10,007, of which PAs were on duty for 1,076 visits and directly involved in n=376 | Descriptive retrospective | <ul style="list-style-type: none"> <li>• Leaving without being seen</li> <li>• Wait time (triage to initial assessment)</li> <li>• LOS in ED</li> </ul> | Ducharme 2009[32]     |

1  
2  
3  
4  
5  
6  
7  
8  
9  
10  
11  
12  
13  
14  
15  
16  
17  
18  
19  
20  
21  
22  
23  
24  
25  
26  
27  
28  
29  
30  
31  
32  
33  
34  
35  
36  
37  
38  
39  
40  
41  
42  
43  
44  
45  
46  
47

|                    |                                                                                                                                                                                                    |                                                                                                                                                                                       |                                                                                                                                                                               |                                    |                                                                                                                                                                                                                                         |                    |                                                                                                                                                                                                                                                                                                                                              |                    |
|--------------------|----------------------------------------------------------------------------------------------------------------------------------------------------------------------------------------------------|---------------------------------------------------------------------------------------------------------------------------------------------------------------------------------------|-------------------------------------------------------------------------------------------------------------------------------------------------------------------------------|------------------------------------|-----------------------------------------------------------------------------------------------------------------------------------------------------------------------------------------------------------------------------------------|--------------------|----------------------------------------------------------------------------------------------------------------------------------------------------------------------------------------------------------------------------------------------------------------------------------------------------------------------------------------------|--------------------|
| Emergency medicine | To understand trends in emergency medicine and interprofessional roles in delivering this care [...] The focus was on how doctors, PAs and nurse practitioners NPs share emergency medicine visits | USA National sample EDs of non-institutional general and short-stay hospitals in the 50 States and the District of Columbia from the National Hospital Ambulatory Medical Care Survey | PAs as providers of ED care and prescribers of medication in emergency medicine (7.9% of patients seen by PAs in 2004)                                                        | Physicians and Nurse Practitioners | Random sample of patient visits to hospital EDs (n=1,034,758,313), 1995-2004                                                                                                                                                            | Longitudinal       | <ul style="list-style-type: none"> <li>• Proportion of visits in which medications are prescribed</li> <li>• Mean number of prescriptions written per visit</li> <li>• Non-narcotic analgesics prescriptions</li> <li>• Narcotic analgesics/NSAIDS prescription by type of provider</li> <li>• Patient contact growth by provider</li> </ul> | Hooker 2008[33]    |
| Emergency medicine | To compare the analgesic practices of emergency physicians with that of PAs                                                                                                                        | USA ED within a suburban teaching hospital in Michigan with 90,000 annual visits                                                                                                      | PAs were deployed for seeing patients presenting at the ED with isolated lower extremity trauma. PAs work closely with emergency physicians in the Prompt Care Area of the ED | Emergency physicians               | n=384 survey respondents of patients of all ages who presented at the ED with an isolated lower extremity injury evaluated with a foot or ankle radiograph, n=227 PA patients, n=153 emergency physician patients in a nine week period | Prospective cohort | <ul style="list-style-type: none"> <li>• Analgesia prescribing</li> </ul>                                                                                                                                                                                                                                                                    | Kozlowski 2002[34] |

|                    |                                                                                                                                                                          |                                                                                             |                                                                                                                                                                                       |                                                                                                         |                                                                                                                                                                                                                                                                                                   |                           |                                                                      |                  |
|--------------------|--------------------------------------------------------------------------------------------------------------------------------------------------------------------------|---------------------------------------------------------------------------------------------|---------------------------------------------------------------------------------------------------------------------------------------------------------------------------------------|---------------------------------------------------------------------------------------------------------|---------------------------------------------------------------------------------------------------------------------------------------------------------------------------------------------------------------------------------------------------------------------------------------------------|---------------------------|----------------------------------------------------------------------|------------------|
| Emergency medicine | To compare the quality of ED pain management before and after implementation of the Joint Commission on the Accreditation of Healthcare Organizations' standards in 2001 | USA<br>National sample EDs included in the National Hospital Ambulatory Medical Care Survey | The use of PAs in the care of patients presenting to the ED with a long bone fracture                                                                                                 | Patients presenting to the ED with a long bone fracture not seen by PAs (medical residents, internists) | n=2064 Patients presenting at the ED with a long bone fracture (femur, humerus, tibia, fibula, radius, or ulna) in two time periods: 1998-2000, n=834 of which 3% were seen by a PA, 9% by resident/intern and 90% by staff physician ; 2001-2003 8% PA, 10% resident/intern, 90% staff physician | Retrospective cohort      | • Proportion of patients with long bone fracture receiving analgesia | Ritsema 2007[35] |
| Emergency medicine | To compare the wound care practices and infection rates of wounds managed in the ED by practitioners with varying levels of medical training.                            | USA<br>Department of Emergency Medicine within a teaching hospital in New York              | All patients with lacerations were evaluated by an attending physician who determined whether wound could be managed by a junior practitioner (PAs, students, interns, and residents) | ED patients whose wounds were managed by other providers (students, interns, and residents)             | All patients with lacerations attending the ED n=1163, n=901 seen by a PA, n=262 by other providers October 1992 – November 1993                                                                                                                                                                  | Prospective observational | • Patient wound infection rate                                       | Singer 1995[36]  |



1  
2  
3  
4  
5  
6  
7  
8  
9  
10  
11  
12  
13  
14  
15  
16  
17  
18  
19  
20  
21  
22  
23  
24  
25  
26  
27  
28  
29  
30  
31  
32  
33  
34  
35  
36  
37  
38  
39  
40  
41  
42  
43  
44  
45  
46  
47

|                         |                                                                                                                                |                                                                      |                                                                                                                                                                                                                                                                                                                                |                                                                                          |                                         |                           |                                                                                                                                                                                                                                                                                                                                                                                                                                                                                                                                                                                                                                                                                                                                                                                                      |                    |
|-------------------------|--------------------------------------------------------------------------------------------------------------------------------|----------------------------------------------------------------------|--------------------------------------------------------------------------------------------------------------------------------------------------------------------------------------------------------------------------------------------------------------------------------------------------------------------------------|------------------------------------------------------------------------------------------|-----------------------------------------|---------------------------|------------------------------------------------------------------------------------------------------------------------------------------------------------------------------------------------------------------------------------------------------------------------------------------------------------------------------------------------------------------------------------------------------------------------------------------------------------------------------------------------------------------------------------------------------------------------------------------------------------------------------------------------------------------------------------------------------------------------------------------------------------------------------------------------------|--------------------|
| Trauma and orthopaedics | To define the clinical and financial impact of hospital-based PAs on orthopaedic trauma care at a level II community hospital. | USA<br><br>Orthopaedic trauma care at a level II community hospital. | Hospital-employed PAs (n=2) were utilised to cover all orthopaedic trauma needs, under the supervision of one of 18 orthopaedic surgeons. Each PA performed 12-hour day shifts for three consecutive days, January to December 2007. PAs on call carried trauma pagers and reported to the emergency room as soon as possible. | Attending surgeon as the primary orthopaedic responder for emergency department consults | n=1104<br>• n=310: PA<br>• n=687: No PA | Comparative retrospective | <ul style="list-style-type: none"> <li>• Triage time to time seen by orthopaedic service in emergency department (minutes)</li> <li>• Triage time to time of surgery (minutes)</li> <li>• Operating room complication rates (%)</li> <li>• The use of deep vein thrombosis prophylaxis (%)</li> <li>• Post-operative antibiotic administration (%)</li> <li>• Postoperative complications (%)</li> <li>• Triage time to out of emergency department (minutes)</li> <li>• Operating room set up time (minutes)</li> <li>• Average operating room time (minutes)</li> <li>• Time from wound closure to wheels out (operating room) (minutes)</li> <li>• Hospital length of stay (minutes)</li> <li>• Cost savings (emergency department) (\$)</li> <li>• Cost savings (operating room) (\$)</li> </ul> | Althausen 2013[37] |
|-------------------------|--------------------------------------------------------------------------------------------------------------------------------|----------------------------------------------------------------------|--------------------------------------------------------------------------------------------------------------------------------------------------------------------------------------------------------------------------------------------------------------------------------------------------------------------------------|------------------------------------------------------------------------------------------|-----------------------------------------|---------------------------|------------------------------------------------------------------------------------------------------------------------------------------------------------------------------------------------------------------------------------------------------------------------------------------------------------------------------------------------------------------------------------------------------------------------------------------------------------------------------------------------------------------------------------------------------------------------------------------------------------------------------------------------------------------------------------------------------------------------------------------------------------------------------------------------------|--------------------|

Halter et al\_PA-SCER\_Main text\_20170912

222

|                         |                                                                                                                                                                                                                                       |                                                                                                                 |                                                                                                                                                                                                                                                                                                                                                                                           |                                                                                                                                                                                                                                                                  |                                                                                                                                                                                                                                                               |                    |                                                                                                                                                                                                                                        |                |
|-------------------------|---------------------------------------------------------------------------------------------------------------------------------------------------------------------------------------------------------------------------------------|-----------------------------------------------------------------------------------------------------------------|-------------------------------------------------------------------------------------------------------------------------------------------------------------------------------------------------------------------------------------------------------------------------------------------------------------------------------------------------------------------------------------------|------------------------------------------------------------------------------------------------------------------------------------------------------------------------------------------------------------------------------------------------------------------|---------------------------------------------------------------------------------------------------------------------------------------------------------------------------------------------------------------------------------------------------------------|--------------------|----------------------------------------------------------------------------------------------------------------------------------------------------------------------------------------------------------------------------------------|----------------|
| Trauma and orthopaedics | To describe the effect of PAs working in an arthroplasty practice from the perspective of patients and health care providers<br>To describe the costs, time savings for surgeons and effects on surgical throughput and waiting times | Canada<br><br>High-volume academic arthroplasty programme employing PAs (The Concordia Joint Replacement Group) | Addition of PAs (n=3) to the operating room team. The PAs were added to the team, replacing surgical assists (usually general practitioners). The PAs took first call with their supervising physician, provided first-assist services in the operating room (OR), write postoperative orders, generate operative notes, undertake daily working rounds and complete discharge summaries. | -Costs: GP first assists in the operating room<br><br>-Waiting times: Patients on the arthroplasty waiting list in 2004 and 2005                                                                                                                                 | Sample size varying by outcome:<br>-Patient satisfaction n=1070<br>-Perceptions of healthcare providers and patients n=44<br>-Costs n=402 surgical procedures performed in 2006<br>-Time savings n=1409 procedures carried out 2006<br>-Waiting times in 2006 | Mixed-methods      | <ul style="list-style-type: none"> <li>• Patient satisfaction</li> <li>• Perceptions of healthcare providers and patients about PAs</li> <li>• Costs</li> <li>• Time savings</li> <li>• Waiting times</li> <li>• Throughput</li> </ul> | Bohm 2010[38]  |
| Trauma and orthopaedics | To assess whether staffing changes within a Level 1 trauma centre improved mortality and shortened hospital and ICU length of stay for patients with trauma.                                                                          | USA<br><br>Urban, community-based level I trauma centre                                                         | Group 3: core trauma panel and PAs                                                                                                                                                                                                                                                                                                                                                        | Group 1: general surgery residents (staffed by full-time, in-house post-graduate year-4 general surgery residents with attending back up from home, followed by a transition to a trauma service staffed with in-house independent general surgeon attendings) ; | n=15297<br>Trauma patients 18 years or older and not transferred from the ED to another acute care facility                                                                                                                                                   | Prospective cohort | <ul style="list-style-type: none"> <li>• Overall mortality</li> <li>• Mortality for patients with injury severity score (ISS) &gt;15</li> <li>• Hospital LOS</li> </ul>                                                                | Mains 2009[39] |

1  
2  
3  
4  
5  
6  
7  
8  
9  
10  
11  
12  
13  
14  
15  
16  
17  
18  
19  
20  
21  
22  
23  
24  
25  
26  
27  
28  
29  
30  
31  
32  
33  
34  
35  
36  
37  
38  
39  
40  
41  
42  
43  
44  
45  
46  
47

---

|                         |                                                                                                                                                                                                  |                                                               |                                                                                                                                                                                                                                                 |                                                                                                          |                                                                                                                                                                                                                                                                              |                          |                                                                                                                                                  |                   |
|-------------------------|--------------------------------------------------------------------------------------------------------------------------------------------------------------------------------------------------|---------------------------------------------------------------|-------------------------------------------------------------------------------------------------------------------------------------------------------------------------------------------------------------------------------------------------|----------------------------------------------------------------------------------------------------------|------------------------------------------------------------------------------------------------------------------------------------------------------------------------------------------------------------------------------------------------------------------------------|--------------------------|--------------------------------------------------------------------------------------------------------------------------------------------------|-------------------|
|                         |                                                                                                                                                                                                  |                                                               |                                                                                                                                                                                                                                                 | Group 2: core trauma panel (consisting of full-time, in-house trauma surgeons, without PAs or residents) |                                                                                                                                                                                                                                                                              |                          |                                                                                                                                                  |                   |
| Trauma and orthopaedics | To analyze patient outcomes and efficiency of care provided for trauma patients during this transition from resident physician support to PA support                                             | USA<br>Level I Trauma Center                                  | PAs substituting for doctors in trauma alerts: PA's role was to assist the trauma surgeon at trauma alerts and trauma patient rounds, update the trauma patient census list                                                                     | General and orthopaedic residents who attend in trauma alerts                                            | n=293-before<br>n=476-after<br>All patients evaluated by the trauma surgeons and on the trauma registry, excluding those transferred to another facility for treatment of severe burns                                                                                       | Before-after             | <ul style="list-style-type: none"> <li>• Collaborative relationship</li> <li>• Transfer time</li> <li>• LOS</li> <li>• Mortality rate</li> </ul> | Oswanski 2004[40] |
| Internal medicine       | To examine and compare costs, between a PA service and an intern/resident (teaching) service in the provision of inpatient care for five high-volume internal medicine diagnostic related groups | USA<br>Two general internal medicine units, teaching hospital | The use of PAs (n=16) in the provision of care within internal medicine department (64 attending physicians on rotation coverage, scheduled to admit to either a PA or teaching service, with group assignment determined one year in advance). | The teaching service (32 intern/residents with an average experience of one year post-medical school)    | Adult patients discharged in the following diagnostic-related groups: cerebrovascular accident/stroke, pneumonia, acute myocardial infarction discharged alive, congestive heart failure, gastro-intestinal haemorrhage: n=923, of which n=409 PA and n=514 teaching service | Prospective cohort study | <ul style="list-style-type: none"> <li>• Relative value units (costs)</li> <li>• Length of stay</li> </ul>                                       | Van Rhee 2002[41] |

---

1  
2  
3 223 In summary, six studies were included from emergency medicine, [31-36] four studies  
4  
5 224 reported from trauma and orthopaedics [37-40] and one from internal medicine. [41] No  
6  
7 225 studies were identified from acute medicine, care of the elderly or mental health.  
8  
9 226 The publication year ranged from 1995[36] to 2013, [37] with only two of the included  
10  
11 227 studies being published after 2010. The majority were from the USA (n=9), with the other  
12  
13 228 two from Canada.[32,38] The studies measured a number of outcomes (see Table 2).  
14  
15  
16  
17  
18  
19  
20  
21  
22  
23  
24  
25  
26  
27  
28  
29  
30  
31  
32  
33  
34  
35  
36  
37  
38  
39  
40  
41  
42  
43  
44  
45  
46  
47  
48  
49  
50  
51  
52  
53  
54  
55  
56  
57  
58  
59  
60

For peer review only

229 **Table 2: Main findings of included studies**

| Specialty          | Outcome measures                                            | Finding(s)                                                                                                                                                                                                                                                                                                         | Quality score | Key limitations                                                                                                                                                   | Study details      |
|--------------------|-------------------------------------------------------------|--------------------------------------------------------------------------------------------------------------------------------------------------------------------------------------------------------------------------------------------------------------------------------------------------------------------|---------------|-------------------------------------------------------------------------------------------------------------------------------------------------------------------|--------------------|
| Emergency medicine | Length of visit (LOV)                                       | Small but clinically insignificant differences (regression coefficient -8): LOV was 8 minutes longer when patients were treated by a PA (mean 82 minutes) than a physician (mean 75 minutes) (95% CI -10 to -6, p<0.001), although difference ranged from 5 to 32 minute difference dependent on patient condition | 82%           | <ul style="list-style-type: none"> <li>Not randomised</li> <li>Differences by patient condition not explained</li> <li>Limited control for confounders</li> </ul> | Arnopolin 2000[31] |
|                    | Total charge                                                | Mean total charge was \$159 when patients were treated by a PA and \$164 by a physician (95% CI: 2 to 14, p=0.013), regression coefficient -8                                                                                                                                                                      |               |                                                                                                                                                                   |                    |
| Emergency medicine | Leaving without being seen                                  | Absolute improvement (not controlling for hospital or acuity) from 6.5 to 4.9%; when a PA was on duty, the likelihood that a patient left without being seen was less than half (44% [95% CI 31% to 63%] p < 0.01), controlling for hospital and patient acuity                                                    | 73%           | <ul style="list-style-type: none"> <li>Two months data</li> <li>Sample size unclear</li> </ul>                                                                    | Ducharme 2009[32]  |
|                    | Wait time (triage to initial assessment)                    | When a PA was involved in patient care, the odds of the patient being seen within the benchmark wait time was 1.6 times greater than when the PA was not involved (95%CI 1.3 to 2.1) p <0.05, adjusting for hospital, acuity and time of day                                                                       |               |                                                                                                                                                                   |                    |
|                    | LOS in ED                                                   | When a PA was involved in patient care, the LOS in the ED was shorter (mean: 262.4 mins versus 182.9 mins) than when a PA was not present (30.3% [95% CI 21.6% to 39%]), p < 0.01                                                                                                                                  |               |                                                                                                                                                                   |                    |
| Emergency medicine | Proportion of visits in which medications are prescribed    | Significant differences were observed between PAs if compared to physicians and NPs in the proportion of visits in which medication was prescribed: PAs 77.9%, physicians 75.5%, nurse practitioners 75.4% (p=0.001)                                                                                               | 73%           | <ul style="list-style-type: none"> <li>Secondary data analysis</li> <li>No adjustment</li> <li>Treatment outcomes/appropriateness not assessed</li> </ul>         | Hooker 2008[33]    |
|                    | Mean number of prescriptions written per visit              | There were no significant differences among the three providers in terms mean number of prescriptions per visit (PA and physician 1.7, nurse practitioner 1.6)                                                                                                                                                     |               |                                                                                                                                                                   |                    |
|                    | Non-narcotic analgesics prescriptions                       | There were no significant differences among the three providers in the frequency of prescribing non-narcotic analgesics (p=0.16).                                                                                                                                                                                  |               |                                                                                                                                                                   |                    |
|                    | Narcotic analgesics/NSAIDS prescription by type of provider | There were also no significant differences among the three prescribers in the frequency of narcotic analgesics or NSAIDS recorded (p=0.15 and p=0.06, respectively)                                                                                                                                                |               |                                                                                                                                                                   |                    |

230

|                         |                                                                               |                                                                                                                                                                                                                                               |      |                                                                                                                                                                                                                                                            |                    |
|-------------------------|-------------------------------------------------------------------------------|-----------------------------------------------------------------------------------------------------------------------------------------------------------------------------------------------------------------------------------------------|------|------------------------------------------------------------------------------------------------------------------------------------------------------------------------------------------------------------------------------------------------------------|--------------------|
| Emergency medicine      | Analgesia prescribing                                                         | Emergency physicians gave some form of ED analgesia to 29% of patients, as compared with 10% of patients seen by PAs (OR=3.58 [CI 95% 2.05 to 6.24]), adjusting for sex, reported degree of pain and fracture                                 | 92%  | <ul style="list-style-type: none"> <li>Dependent on patient recall</li> </ul>                                                                                                                                                                              | Kozlowski 2002[34] |
| Emergency medicine      | Proportion of patients with long bone fracture receiving analgesia            | Patients seen by PAs had more than twice the odds of receiving opiates/narcotics (OR=2.05% [95%CI 1.24 to 3.29]) and were more likely to receive analgesics (OR=1.72% [95%CI 0.94 to 3.17]) compared with those not seen by PAs               | 100% | <ul style="list-style-type: none"> <li>Changes in workload and documentation could have confounded results</li> </ul>                                                                                                                                      | Ritsema 2007[35]   |
| Emergency medicine      | Patient wound infection rate                                                  | There were no significant differences in wound infection rates by practitioner level of training (medical students, 0/60[0%]; all residents, 17/547[3.1%]; physician assistants, 11/305[3.6%]; and attending physicians 14/251[5.6%]; p=0.14) | 67%  | <ul style="list-style-type: none"> <li>Hawthorne effect</li> <li>Differences in wounds not controlled for</li> </ul>                                                                                                                                       | Singer 1995[36]    |
| Trauma and orthopaedics | Triage time to time seen by orthopaedic service (emergency department) (mins) | PA presence resulted in a 205 minutes faster orthopaedic service response time (366 versus 571 mins; p=0.0006)                                                                                                                                | 91%  | <ul style="list-style-type: none"> <li>Exact cost savings difficult to determine</li> <li>Did not have a way of calculating savings for the time it took for patients to reach the OR from the time of triage</li> <li>Single site with two PAs</li> </ul> | Althausen 2013[37] |
|                         | Triage time to time of surgery (ER) (mins)                                    | PA presence resulted in a 360 minutes improvement in time to surgery (1139 versus 1499 mins; p=0.03)                                                                                                                                          |      |                                                                                                                                                                                                                                                            |                    |
|                         | Operating room complication rates (%)                                         | There was no significant difference in the proportion of operating room complications between the presence and the absence of PAs (both 0.65%; p=0.9972)                                                                                      |      |                                                                                                                                                                                                                                                            |                    |
|                         | The use of deep vein thrombosis prophylaxis (%)                               | The use of deep vein thrombosis prophylaxis increased by a mean of 6.73% (60.69 versus 53.96%; p = 0.0084) with PA presence.                                                                                                                  |      |                                                                                                                                                                                                                                                            |                    |
|                         | Post-operative antibiotic administration (%)                                  | Post-operative antibiotic administration increased by 2.88% with PA presence (94.35 versus 91.47%; p=0.0302)                                                                                                                                  |      |                                                                                                                                                                                                                                                            |                    |
|                         | Postoperative complications (%)                                               | There was a 4.67% decrease in postoperative complications with PA presence (8.16 versus 12.83%; p=0.0034)                                                                                                                                     |      |                                                                                                                                                                                                                                                            |                    |

|                                                               |                                                                                                                                                                                                                 |
|---------------------------------------------------------------|-----------------------------------------------------------------------------------------------------------------------------------------------------------------------------------------------------------------|
| Triage time to out of emergency department (mins)             | There was a 176 minutes decrease in total ER time with PA presence (270 versus 446 mins; p<0.001)                                                                                                               |
| Operating room set up time (mins)                             | There was a marginally improved operating room set up time by 0.43 minutes with PA presence (26.6 versus 24 mins; p=0.0034)                                                                                     |
| Time from wound closure to wheels out (operating room) (mins) | There was no significant difference for this outcome when the PA was present (7.8 versus 7.6 mins; p=0.5914)                                                                                                    |
| Average operating room time (mins)                            | There was no significant difference in the average operating room time when the PA was present (70 versus 74 mins; p=0.44)                                                                                      |
| Cost savings (emergency department) (\$)                      | Based on 50% collection of PA charges and emergency department time savings, per orthopaedic trauma patient seen, PAs saved the hospital \$133.53 per patient, resulting in \$41,394 in one year (310 patients) |
| Cost savings (operating room) (\$)                            | The presence of a PA in the operating room resulted in savings of \$3,207 based on operating room costs (only set up time was decreased with presence of the PA).                                               |
| Hospital length of stay (days)                                | There was no significant difference in the hospital LOS when the PA was present if compared to when the presence and the absence of PAs (7.96 versus 8.57 days; p=0.2662)                                       |

|                         |                                                            |                                                                                                                                                                                                                                                                                                                                                                                                                                                                                                                                                                                                                                                                                                                                                                                                                                                                                                                                                                                                                                                                                                            |     |                                                                                                                                                                                                                                                                                                                                     |               |
|-------------------------|------------------------------------------------------------|------------------------------------------------------------------------------------------------------------------------------------------------------------------------------------------------------------------------------------------------------------------------------------------------------------------------------------------------------------------------------------------------------------------------------------------------------------------------------------------------------------------------------------------------------------------------------------------------------------------------------------------------------------------------------------------------------------------------------------------------------------------------------------------------------------------------------------------------------------------------------------------------------------------------------------------------------------------------------------------------------------------------------------------------------------------------------------------------------------|-----|-------------------------------------------------------------------------------------------------------------------------------------------------------------------------------------------------------------------------------------------------------------------------------------------------------------------------------------|---------------|
| Trauma and orthopaedics | Patient satisfaction                                       | 91.3% of hip patients (total= 626, 58.5% response) reported being satisfied or very satisfied and 87.7% of knee patients reported being satisfied or very satisfied with PAs at one year follow-up (after surgery)                                                                                                                                                                                                                                                                                                                                                                                                                                                                                                                                                                                                                                                                                                                                                                                                                                                                                         | 32% | <ul style="list-style-type: none"> <li>• Methods are not fully described e.g. no description of data analysis</li> <li>• Sample is not described</li> <li>• Is this a study about PAs or about the two room operating model?</li> <li>• Patient satisfaction with the surgery at one year cannot be attributed to the PA</li> </ul> | Bohm 2010[38] |
|                         | Perceptions of healthcare providers and patients about PAs | <p>Patients: Overall patients expressed very positive opinions of PAs who were helpful in providing information and explaining aspects of their care</p> <p>Ward nurses: felt that patient care, information flow and patient rounds were enhanced by the PAs; ambiguous as to whether PA tasks fell within the scope of nursing</p> <p>Orthopaedic surgeons: overall the surgeons had very positive opinions of PAs – 100% agreement with all survey items: ‘a fully trained PA provides surgical assistance equal to an R5’; ‘the presence of PA has improved your job satisfaction’; ‘the presence of a PA has safely allowed you to do more surgical volume’; ‘the care of your patients in the OR is improved by the assistance of PAs’; ‘PAs greatly decrease the amount of “scut work” that you have to do’</p> <p>Operating room nurses: overall OR nurses reported that PAs were valuable team members; improved the care of orthopaedic surgery patients in the operating room; provided surgical assistance superior to family practitioners; and were necessary to run two operating rooms</p> |     |                                                                                                                                                                                                                                                                                                                                     |               |

Orthopaedic residents: nearly unanimous that PAs reduced their workload and they generally felt that PAs relieved them of clinical responsibilities so that they could attend teaching.

|                         |                                                             |                                                                                                                                                                                                                                                                                                                                                                                                                                            |                  |                                                                                                                                                                                                                                                                                                                                                                                                                         |                   |
|-------------------------|-------------------------------------------------------------|--------------------------------------------------------------------------------------------------------------------------------------------------------------------------------------------------------------------------------------------------------------------------------------------------------------------------------------------------------------------------------------------------------------------------------------------|------------------|-------------------------------------------------------------------------------------------------------------------------------------------------------------------------------------------------------------------------------------------------------------------------------------------------------------------------------------------------------------------------------------------------------------------------|-------------------|
|                         | Costs                                                       | The cost of employing three PAs in 2006 (between \$270,000 AND \$327000) was found to be similar to the forgone general practitioner (GP) surgical assist fees of \$270226.88.                                                                                                                                                                                                                                                             |                  |                                                                                                                                                                                                                                                                                                                                                                                                                         |                   |
|                         | Time savings                                                | PAs were found to “free up” 204 hours per year (the equivalent of four 50-hour work weeks), for their supervising physician (p=not reported). Furthermore, they potentially freed GPs from the operating room to spend more time delivering primary care                                                                                                                                                                                   |                  |                                                                                                                                                                                                                                                                                                                                                                                                                         |                   |
|                         | Throughput                                                  | Increased the volume from three to seven primary joint surgeries per day through the use of double rooms in 2006                                                                                                                                                                                                                                                                                                                           |                  |                                                                                                                                                                                                                                                                                                                                                                                                                         |                   |
|                         | Waiting time                                                | Median wait time for surgery decreased from 44 to 30 weeks                                                                                                                                                                                                                                                                                                                                                                                 |                  |                                                                                                                                                                                                                                                                                                                                                                                                                         |                   |
| Trauma and orthopaedics | Overall mortality                                           | The introduction of PAs to the core trauma panel (group 3 versus group 2) decreased overall mortality (2.80% versus 3.76%, adjusted OR=0.74 [CI95% 0.55 to 0.99], p=0.05). Furthermore, the introduction of PAs to general surgery residents (group 3 versus group 1) decreased overall mortality (2.32% versus 3.82%, adjusted OR=0.6 [CI95% 0.45 to 0.81], p=0.003)                                                                      | 100%             | <ul style="list-style-type: none"> <li>Not all the covariates which could be significantly associated with outcomes were collected (e.g. changes in care)</li> <li>The group 1 period was characterised by a transition from on-call attending surgeons to in-house surgeons and the outcomes may not be homogenous across the study period</li> <li>Other changes were made, not just individual staff type</li> </ul> | Mains 2009[39]    |
|                         | Mortality for patients with injury severity score (ISS) >15 | The introduction of PAs to the core trauma panel (group 3 versus group 2) decreased overall mortality for patients with injury severity score (ISS) >15 (9.67% versus 12.21%, adjusted OR=0.77 [CI95% 0.55 to 0.99], p=0.13). Furthermore, the introduction of PAs to general surgery residents (group 3 versus group 1) decreased overall mortality in this patients (9.03% versus 14.83%, adjusted OR=0.6 [CI95% 0.41 to 0.80], p=0.003) |                  |                                                                                                                                                                                                                                                                                                                                                                                                                         |                   |
|                         | Hospital LOS                                                | The introduction of PAs to the core trauma panel (group 3 versus group 2) reduced mean and median hospital LOS (4.32 days versus 4.69 days, p=0.05; and 3.74 days versus 3.88 days, p= 0.02, respectively). As well, the introduction of PAs to general surgery residents (group 3 versus group 1) reduced mean and median hospital LOS (4.32 days versus 4.62 days, p=0.05; and 3.74 days versus 3.94 days, p= 0.003, respectively)       |                  |                                                                                                                                                                                                                                                                                                                                                                                                                         |                   |
| Trauma and orthopaedics | Collaborative relationship                                  | Participation during trauma alert calls: PA 100%; resident 51% overall, 88% during on duty hours; Involvement in minor procedures PA 100% when residents off-duty, 91% overall; resident 95% during on duty hours, 83% overall.                                                                                                                                                                                                            | Before-after 82% | <ul style="list-style-type: none"> <li>Investigators not blinded and all work in the trauma centre investigated.</li> <li>No sample size calculation versus multiple</li> <li>Single site with two PAs</li> <li>Minimal description of</li> </ul>                                                                                                                                                                       | Oswanski 2004[40] |
|                         | Transfer time                                               | When controlling for age, gender, race and severity of illness, there was no significant difference in the mean transfer rate overall or for any subpopulation (destination) between years 1998 and 1999                                                                                                                                                                                                                                   |                  |                                                                                                                                                                                                                                                                                                                                                                                                                         |                   |
|                         | LOS                                                         | When controlling for age, gender, race and severity of injury, there was no significant                                                                                                                                                                                                                                                                                                                                                    |                  |                                                                                                                                                                                                                                                                                                                                                                                                                         |                   |



1  
2  
3  
4  
5  
6  
7  
8  
9  
10  
11  
12  
13  
14  
15  
16  
17  
18  
19  
20  
21  
22  
23  
24  
25  
26  
27  
28  
29  
30  
31  
32  
33  
34  
35  
36  
37  
38  
39  
40  
41  
42  
43  
44  
45  
46  
47

-----  
difference in the mean LOS overall between years 1998 and 1999  
-----

data collection method

Mortality rate      Mortality rate for all patients admitted to the trauma service was 2.2% for both 1998 (8/293) and 1999 (13/479)

|                   |                              |                                                                                                                                                                                                                                                                                                                                                                                                                                                                                                                                                                                                                                                                                                                          |                                 |                                                                                                                                                   |                   |
|-------------------|------------------------------|--------------------------------------------------------------------------------------------------------------------------------------------------------------------------------------------------------------------------------------------------------------------------------------------------------------------------------------------------------------------------------------------------------------------------------------------------------------------------------------------------------------------------------------------------------------------------------------------------------------------------------------------------------------------------------------------------------------------------|---------------------------------|---------------------------------------------------------------------------------------------------------------------------------------------------|-------------------|
| Internal medicine | Relative value units (costs) | 1) Radiology RVUs: There were no statistically significant differences between PAs and residents; 2) Total RVUs (excluding pharmacy data): PAs used significantly fewer resources when compared to resident services for pneumonia care (p = .004), although had a higher mortality rate (% and p value not reported). For all other diagnoses there were no statistically significant differences in total relative value units between PAs and residents; 3) Laboratory RVUs: There were statistically significant differences between PAs and residents in laboratory relative value units for stroke (p = .015), pneumonia (p = .003) and CHF (p = .004). In each case PAs' RVUs were lower than those of residents. | Prospective cohort study<br>86% | <ul style="list-style-type: none"> <li>• RVU figures are not explained</li> <li>• Non-random group assignment</li> <li>• Single centre</li> </ul> | Van Rhee 2002[41] |
|                   | LOS                          | There were no significant differences in LOS between PAs and residents after adjusting for admitting physician effect and other covariates                                                                                                                                                                                                                                                                                                                                                                                                                                                                                                                                                                               |                                 |                                                                                                                                                   |                   |

231

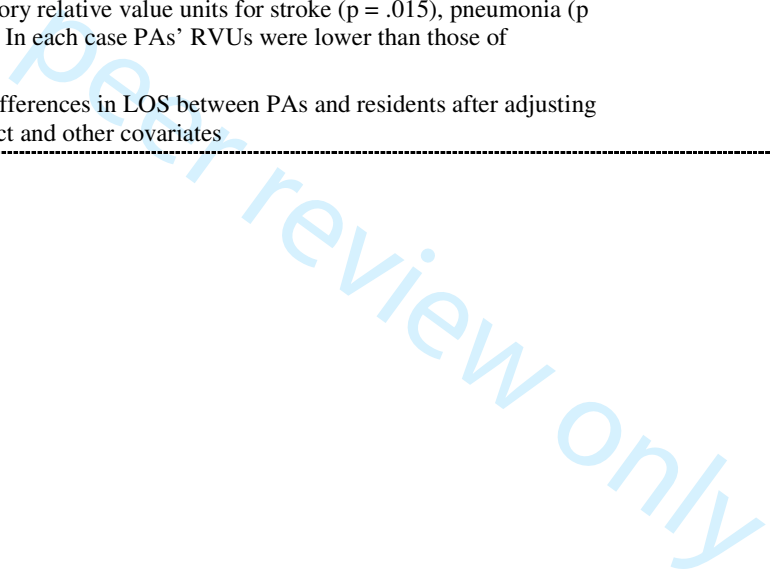

1  
2  
3 One study employed mixed methods; [38] the remainder employed quantitative approaches.  
4  
5 Five studies analysed prospectively collected data [34,36,38,39,41] and four used a  
6  
7 retrospective analysis.[31,32,33,37] All studies bar one [41] were observational.  
8  
9

### 10 11 **Methodological quality**

12  
13 The studies were of variable methodological quality. The mean score was 80% (SD 19),  
14  
15 median 73%, minimum 32%, [38] maximum 100%, [35,39] IQR 73,92. Figure 2 presents a  
16  
17 summary of the degree to which the included studies met the criteria of methodological  
18  
19 quality and shows that the most important methodological flaws in the included studies were  
20  
21 the failure to adjust the analysis for confounding variables, the absence of information to  
22  
23 evaluate participants' selection adequacy, and the lack of information about baseline and/or  
24  
25 demographic information of the investigated patients or PAs.  
26  
27  
28  
29  
30

### 31 **Synthesis of findings on the impact of physician associates**

32  
33 We organised our findings by secondary care specialty. Within each specialty, we described  
34  
35 the findings within the quality dimensions, [20] presenting the dimension with the largest  
36  
37 number of studies within each specialty.  
38  
39  
40  
41

#### 42 **Emergency medicine**

43  
44 The six studies in emergency medicine compared clinical care offered by PAs and physicians  
45  
46 of various grades[33,34,35,36] and two operational/service measures.[31,32] In only one of  
47  
48 these studies was the comparison of PAs and other physicians in a system where the PAs  
49  
50 were described as working 'solo', substituting for physicians at particular times of the  
51  
52 day.[31]  
53  
54  
55  
56  
57  
58

1  
2  
3 Waiting or access\_outcomes were reported in one Canadian study; [32] the outcomes were  
4 leaving without being seen and waiting times. The presence of a PA was reported as  
5 significantly reducing the likelihood of a patient leaving without being seen by 44% (the  
6 crude rate being 6.5 without and 4.9% with a PA). and the odds of a patient being seen  
7 within their benchmark wait time was 1.6 times greater when the PA was involved in the  
8 patient's care, with these analyses strengthened by adjustment for hospital, time of patient  
9 visit and acuity level.[32] However, the PA was an additional staff resource rather than a  
10 substitute in this study, giving extra coverage at the busiest times, alongside also newly  
11 appointed nurse practitioners, who increased the odds of being seen on target more than the  
12 PAs did, with an odds ratio of 2.1. .

13  
14  
15  
16  
17  
18  
19  
20  
21  
22  
23  
24  
25 Length of stay was considered in two studies,[31,32] with contradictory results in the  
26 comparison against physicians, from different interventions in terms of PAs. Arnopolin and  
27 Smithline (2000)[31] reported experienced ED PAs and physicians working solo at different  
28 times of day in a satellite unit. This study provided a direct comparison (and control for  
29 patient age in the analysis), with a result of a statistically significantly mean longer length of  
30 visit (eight minutes) for patients of PAs but also noted that differences in length of visit  
31 varied by diagnostic group, with PAs' patients between five and 32 minutes longer. In  
32 contrast, Ducharme et al[32] reported that where PAs were an additional staff resource  
33 alternating with nurse practitioners, PAs reduced length of stay the by 30% (mean 80 minute  
34 reduction).

35  
36  
37  
38  
39  
40  
41  
42  
43  
44  
45  
46  
47 Cost was considered through total charge (hospital and physician charge) for the visit, [31]  
48 with a small but statistically significant decrease per patient reported when patients were  
49 treated by a PA, with differences (not statistically significant) by diagnostic groups.  
50  
51  
52  
53  
54  
55  
56  
57  
58

1  
2  
3 Treatments offered, in terms of analgesia prescribing, were reported in three studies,  
4 [33,34,35] with conflicting findings. Secondary analysis of national (USA) ED survey data  
5 (1995 to 2004) reported no significant difference by type of provider in frequency of  
6 prescribing narcotic and non-narcotic analgesics and in the mean number of prescriptions per  
7 visit, but did observe a statistically significantly higher proportion of PAs' cases receiving a  
8 prescription compared with those of physicians and nurse practitioners. [33] No adjustment  
9 for potential confounders was made. Using the same national survey data but for a subset for  
10 long bone fractures, secondary analysis for 1998 to 2003 reported similarly, with those seen  
11 by a PA having adjusted odds of 2.05 for receiving opiate analgesia in the ED. This well  
12 powered retrospective cohort study of high quality differs from another study of similar  
13 quality with somewhat contrasting findings [34]. For patients contacted at an undefined time,  
14 on average three days following their ED visit, those attended by an emergency physician had  
15 adjusted odds of 3.52 for receiving pain medication while in the ED (29% of their patients)  
16 compared to those attended by PAs (10% of their patients), in a prospective cohort study  
17 based on patient self-report.[34] Although the period of time for this study is not specified, it  
18 first reported in 1998, perhaps suggesting the same decade of data was involved. These three  
19 studies did not report the PAs' place in the team or whether they added to, substituted for  
20 members of the medical team, nor whether they saw patients as part of a team or solo.  
21  
22  
23  
24  
25  
26  
27  
28  
29  
30  
31  
32  
33  
34  
35  
36  
37  
38  
39  
40

41  
42 The only study that considered a clinical outcome of care was the oldest study in the review  
43 [36], from 1995. PAs were reported to have no statistically significant difference in wound  
44 infection rates, in a large sample of patients presenting with lacerations at the ED, compared  
45 to other medical staff providers (medical students, residents and attending physicians).[36]  
46  
47  
48  
49  
50  
51 However, the authors noted a potential Hawthorne effect as all wounds had been evaluated  
52 by an attending physician prior to allocation to one of the medical team members, based on  
53  
54  
55  
56  
57  
58  
59  
60

1  
2  
3 their level of training. It was noted that PAs in this study, with nine to 12 years' experience,  
4  
5 were classified as experienced (not junior) practitioners.  
6  
7  
8  
9

## 10 Trauma and orthopaedics

11  
12  
13 Four papers reported on PAs working in trauma and orthopaedics. These spanned a 10 year  
14  
15 period. Three [37,39,40] focused on an aspect of provision of a hospital trauma service; and  
16  
17 one considered planned inpatient care.[38]  
18  
19

20  
21 Two studies described how PAs were substituting for doctors, for residents [40] or GP  
22  
23 surgical assistants [38], whilst the others presented service re-organisations of which PAs  
24  
25 were a part, seemingly an addition to the pre-existing medical team [37, 39] The outcomes  
26  
27 assessed were numerous - patient satisfaction, perceptions of other clinical staff, costs, time  
28  
29 of various aspects of care, length of stay, operative complications and mortality. The strength  
30  
31 of evidence for each outcome is now assessed.  
32  
33

34  
35 One prospective study reported both patient satisfaction and acceptability of PAs to other  
36  
37 clinical staff from surveys of these groups. Positive results were presented from the patient  
38  
39 satisfaction survey, although the number of respondents was small and no comparator data  
40  
41 were collected. The reports of staff were more mixed, with physician team members being  
42  
43 positive and nursing staff more equivocal, expressing concern about the overlap of tasks  
44  
45 traditionally considered to be the responsibility of nurses.  
46  
47

48  
49 Operational measures were addressed in all four of the studies in this specialty, split into a  
50  
51 number of outcomes pertaining to time [37-40] and to cost. [37,38]  
52  
53

54  
55 The evidence of the impact of PAs on access times was equivocal. One study reported how  
56  
57 the wait to be seen and the length of treatment by the orthopaedic service in the emergency  
58  
59

1  
2  
3 department section of their orthopaedic pathway were significantly shortened when PAs were  
4 substituted directly for doctors, although the authors attributed this to a combination of factors, and  
5 not just to the PAs, including more registered nurse cover, introduction of a family practice resident  
6 and other changing practices.[40] Another found the same when PAs were added to the team as  
7 part of larger trauma team re-organisation.[37] Median number of weeks to wait for surgical  
8 procedures were also reported to be reduced,[38] attributed by the authors to the use of two  
9 operating theatres by the surgeon, made possible by the PA preparing and finishing the case.  
10 In terms of time, Althausen et al (2013)[37] reported in detail on operating room times – set  
11 up, wound closure to out of theatre, average operating room time – and only noted a minimal  
12 (not statistically significant) difference for set up time in a direct comparison study. PAs  
13 also released time for supervising physicians and general practitioners (GPs), who had  
14 previously acted as surgical assistants [38].

15  
16  
17  
18  
19  
20  
21  
22  
23  
24  
25  
26  
27  
28  
29 Three high quality studies [37,39,40] reported variably on length of hospital stay, with one  
30 showing a significant reduction (three to four hours, a fraction of one day) for all patients  
31 when PAs were an addition to either the resident physician team or reorganised trauma  
32 panel[39] and two replacement studies finding no difference – when carrying out adjusted  
33 analyses of one year against another[40] or when PAs were present or not.[37]

34  
35  
36  
37  
38  
39  
40  
41 Evidence regarding cost was again mixed. Bohm[38] suggests the actual costs of employment  
42 were similar to those of the GPs they replaced in the operating room but argue an opportunity  
43 cost for others through released time for supervising physicians. However, a non-  
44 replacement model, Althausen[37] reported specific cost savings in the ED and operating  
45 room based on time reduction and PA charges (although they noted that only 50% of PA  
46 costs were covered through charges).  
47  
48  
49  
50  
51  
52  
53  
54  
55  
56  
57  
58  
59  
60

1  
2  
3 As well as these operational measures, these studies also reported health outcomes, and all  
4 reported improvement in these.[37,39,40] One considered the rate of complication from  
5 procedures involving physician associates [37] and two reported on mortality.[39,40] In  
6 terms of operating room complication rates, these did not differ significantly, but  
7 postoperative complications were reported to have decreased and antibiotic use and DVT  
8 prophylaxis increased (statistically significantly) for cases with a physician associate present  
9 (although it is noted that the tables in this paper presented the findings contradictory to the  
10 text and abstract).[37] One study assessing mortality in two, year long periods reported that  
11 involvement of PAs in the clinical team had no effect on overall mortality rates[40] while  
12 another found that mortality decreased by approximately one per cent with the introduction of  
13 PAs to a trauma panel and 1.5% to general surgery residents' teams.[39] However, this could  
14 not be directly attributable to the addition of the PA because contemporaneous improvements  
15 in efficiency of the trauma service occurred.

#### 34 Internal (acute) medicine

35  
36  
37 The only study [41] considering PAs in internal (acute) medicine examined resource use.  
38 This study measured length of stay, direct costs, and outcomes for patients with diagnoses of  
39 cerebrovascular accident, pneumonia, acute myocardial infarction discharged alive,  
40 congestive heart failure and gastrointestinal haemorrhage. In this controlled comparative  
41 replacement (PAs for interns/residents) study no significant differences in length of stay were  
42 found between patients admitted by attending physicians to teams with a physician associate  
43 or team with an intern/resident, with length of stay considered to be a proxy for severity of  
44 illness. Cost in terms of relative value units (RVUs, based on billing information for  
45 physician-ordered items, excluding administrative costs outside of the physician's control)

1  
2  
3 was also mostly similar although laboratory RVUs were lower for PAs, that is, they ordered  
4  
5 fewer investigations after adjustment for demographics in each diagnostic group. The  
6  
7 authors concluded that PAs used resources as effectively as, or more effectively than,  
8  
9 residents.  
10

## 15 **DISCUSSION**

### 18 Principal findings

21 This systematic review identified a large number of studies of PAs working in secondary care  
22  
23 settings, internationally. However, once studies were excluded that did not meet the inclusion  
24  
25 criteria, only 11 papers remained. Most of the included studies were from the emergency  
26  
27 medicine and trauma and orthopaedics specialties, with one from internal medicine. We  
28  
29 found no studies in our other specialties of interest – care of the elderly and mental health –  
30  
31 where other larger groupings of physician associates worked in the UK according to national  
32  
33 survey[16] at the time of planning this review. Several of the studies were of high quality,  
34  
35 providing comparative data, and some contained statistical adjustments to address  
36  
37 confounding; however all findings were observational. While we recognise that trials are  
38  
39 rarely feasible in this type of workforce intervention, adjustment for confounding by  
40  
41 indication is a serious challenge in this setting, especially when using a limited routine data  
42  
43 source, and there was evidence of both residual confounding from imperfect measures of  
44  
45 severity[42] and bias from adjusting for co-variables that were not confounders.[43] Quality  
46  
47 also varied widely. This is noteworthy considering that this was a relatively recent set of  
48  
49 papers. In addition, comparison and synthesis has been limited by the mix in the papers of  
50  
51 those who measure outcomes where PAs are an addition to a team (presenting difficulties in  
52  
53 attributing the outcomes to PAs as opposed to any other increase in team capacity) and those  
54  
55  
56  
57  
58



1  
2  
3 where PAs substitute for other physicians where the contribution of PAs is actually being  
4 measured. Although every paper reported the contribution of PAs in its  
5 speciality/subspecialty as overall positive, it is important that the following summary of the  
6 main findings of the review is considered in the context of the issues of method and  
7 methodological quality.  
8  
9  
10  
11  
12

13  
14 Results were spread across a number of outcomes, though those related to operational  
15 measures were most prevalent. Outcomes reported when employing PAs in emergency  
16 medicine were varied. Operational performance results reported were decreased waiting time  
17 and reduced length of stay in the emergency department,[32] and an increase in length of visit  
18 for those seen by PAs[31] and reduced charges.[31] Health care outcomes reported were no  
19 difference in wound infection rate,[36] and differences which were difficult to interpret, for  
20 example an increased prescription rate[33], or increase[35] or decrease in analgesia  
21 prescribing.[34] The messages are remarkably similar for trauma and orthopaedics.  
22  
23  
24  
25  
26  
27  
28  
29  
30

31 Operational measures highlighted no difference to [40] or reduced [37,38,39] waiting times in  
32 the emergency, operative and post-operative phases of care; released physician time[38] and  
33 reduced cost.[37] Here the evidence on health outcomes was mostly positive – increased  
34 adherence to treatment processes such as antibiotic administration[37] and reduced post-  
35 operative complications[37] and either no difference[40] or a reduction[39] in mortality. High  
36 patient satisfaction and staff acceptability were also reported.[38]  
37  
38  
39  
40  
41  
42  
43  
44

45 The one study in internal (acute) medicine was one of the few using a prospective design, and  
46 found few differences in efficiency measures between PAs and residents, although there were  
47 lower costs for some conditions.[41]  
48  
49  
50  
51

52 Summarising across the specialties we have reported three studies where PAs were an  
53 addition to the team.[32,37,39] In these more patients are reported to have been treated;  
54  
55  
56  
57  
58

1  
2  
3 waiting, ED and operating room times are said to have been shorter and mortality to be  
4  
5 lower; assessment of the contribution of PAs as opposed to any increase in team capacity is  
6  
7 limited. Six studies which compared outcomes of care by PAs and physicians either when  
8  
9 one or the other was providing care or when PAs were substituting overall for physicians  
10  
11 [31,34,36,38,40,41] presented mixed results: either no or a very small difference to length of  
12  
13 stay, reduced resource used but at equal cost, some time savings to senior physicians, lower  
14  
15 analgesia prescribing, no difference in wound infection rate or in acceptability to staff and  
16  
17 patients. In the two studies carrying out secondary data analysis we do not know if the PAs  
18  
19 were additions or substitutions but both reported higher prescribing by PAs.  
20  
21  
22  
23  
24  
25

#### 26 Strengths and weaknesses

27  
28  
29 This review has systematically assessed the body of PA literature most immediately  
30  
31 applicable to the current UK secondary care setting. We selected the five specialties in which  
32  
33 PAs in the UK were mostly reported to be working[16] and therefore drew together the  
34  
35 evidence of most relevance in that context and noted prominent gaps in evidence. However,  
36  
37 this excluded evidence from other specialties. We excluded any studies including intensive  
38  
39 care data as this overlapped with acute medicine in many abstracts and we could not  
40  
41 separately draw this out. We note that this literature appeared to include a greater proportion  
42  
43 of studies with stronger study designs, including prospective and randomised designs.  
44  
45

46  
47 All of the included papers were from North America, with the majority from USA, where  
48  
49 health service organisation and the PA role may differ from that in other countries developing  
50  
51 the PA role. In the USA PAs can prescribe and are, as a body, more experienced than in  
52  
53 countries more recently embracing this role.  
54  
55  
56  
57  
58

1  
2  
3 We planned to carry out meta-analysis as appropriate to the literature included. The diversity  
4 of intervention as in initiation of PAs or change to PA practice being measured prevented  
5 this, as did identifying the effect of PAs when there were other simultaneous changes, even  
6 where a body of literature pertaining to a particular outcome measure, such as length of stay,  
7 was included. Although narrative review is more limited in its precision, in following a  
8 framework for this, we have aimed to provide a clear rationale for the synthesis and  
9 conclusions we draw from it.  
10  
11  
12  
13  
14  
15  
16  
17  
18  
19  
20  
21

## 22 Meaning of the study

23  
24 This evidence is heavily weighted towards process times and patient satisfaction, with much  
25 less on health outcomes, although outcomes are crucial to assess safety of practice for all  
26 clinicians. Similar findings have been reported in a systematic review of new (non-medical)  
27 roles in emergency medicine – reductions in waiting times in emergency departments, high  
28 level of patient satisfaction, confidence and acceptance of the roles. [44] Evidence also  
29 suggests that the perception of waiting times and satisfaction are correlated. [45]  
30  
31  
32  
33  
34  
35  
36  
37

38 Evidence within the parameters of this review from outside of the USA is very slim, as is  
39 evidence from multi-centre studies. The case for PAs in the UK secondary care setting is  
40 made on the stability they might offer to medical teams and their broad knowledge in the face  
41 of hyper-specialisation.[46] Our recently-acquired knowledge suggests that PAs in England  
42 work in teams of multiple medical and other clinical staff grades[47] and that they are seen  
43 primarily as a resource where there are significant medical staffing issues.[48] When we  
44 place this emerging evidence alongside the exponential growth in training numbers for PAs  
45 in England (alongside other UK countries),[49] government support for their professional  
46 regulation[50] and increased numbers (in primary care at least)[51] we suggest that this  
47  
48  
49  
50  
51  
52  
53  
54  
55  
56  
57  
58  
59  
60

1  
2  
3 professional group is judged by increasing numbers of employers and workforce planners to  
4  
5 be of value, alongside other medical associate professions.[52].  
6  
7

8 The studies included in this review can be seen as complex interventions in complex systems  
9  
10 and yet this has not been considered in the conclusions the authors draw. Well-controlled  
11  
12 studies are needed to fill in the gaps in our knowledge about the outcomes of PAs'  
13  
14 contribution to the secondary care. High quality substitution evidence from the Netherlands,  
15  
16 [53,54] published since we conducted this review, suggests that the role differs in offering  
17  
18 greater continuity and PA-managed wards are similarly cost effective to resident-managed  
19  
20 wards. More such evidence is required as well as further evaluation from a realist perspective  
21  
22 – considering context, mechanisms and outcome - if PAs cannot be separated from service;  
23  
24 measurement would utilise the principles of realist complex intervention science[55] or  
25  
26 process evaluation to “Clearly describe the intervention and clarify causal assumptions (in  
27  
28 relation to how it will be implemented, and the mechanisms through which it will produce  
29  
30 change, in a specific context).”[56]  
31  
32  
33  
34  
35  
36  
37  
38  
39  
40  
41  
42  
43  
44  
45  
46  
47  
48  
49  
50  
51  
52  
53  
54  
55  
56  
57  
58  
59  
60

## Conclusion

Limited research evidence on physician associates working in emergency medicine, trauma and orthopaedics and internal (acute) medicine exists, with a lack of evidence in other specialties. The studies report mostly positive results but these are difficult to interpret in studies where cause and effect cannot be attributed as the PAs worked as additions as well as substitutes in complex systems where work is organised in teams. Physician associate employment is often part of wider service re-design or staffing recalibration as a result of other changes, for example, availability of medical staff. Rigorous evaluation is required to address the complexity of the PA role, reporting on more than one setting and should include comparators. Clinicians, managers, service commissioners and service users need more evidence about the contribution of physician associates/assistants.

## COMPETING INTERESTS

SdeL is Head of Department of Clinical and Experimental Medicine; one of the Sections in this Department – Medical Education - runs a Physician Associate course.

- JP chairs the UK and Ireland Board for Physician Associate Education and is director of the Physician Associate programme at the University of Birmingham.

## FUNDING AND DISCLAIMER

This project was funded by the National Institute for Health Research Health Services and Delivery Research Programme (project number 14/19/26).

The views and opinions expressed herein are those of the authors and do not necessarily reflect those of the HS&DR Programme, NIHR, NHS or the Department of Health.

## DATA SHARING STATEMENT

No further data are available

## CONTRIBUTOR STATEMENT

MH led the design, execution and writing of this paper, under the direction of the study's PI VMD and supported by discussion with and written feedback from all co-authors' (CW, FP, HG, SdeL, JP, RG, JG, LN) on the design of the review and interpretation of findings. In addition, MH, CW, FP and VMD searched for literature and carried out data extraction and quality assessment. All authors (CW, FP, HG, SdeL, JP, RG, JG, LN, VMD) contributed intellectual content to the paper.

1  
2  
3 **TABLES AND FIGURES:**

4  
5 Figure 1: PRISMA flow chart

6  
7 Figure 2: 'Risk of bias' graph: review authors' judgements about each risk of bias item  
8  
9 presented as percentages across all included studies

10  
11 Supplementary file 1: Scoping review (Preliminary Medline search strategy – 24/11/2015)  
12  
13 and MeSH (Medical Subject Headings) definition of search terms used  
14  
15

16  
17  
18  
19  
20  
21  
22  
23  
24  
25  
26  
27  
28  
29  
30  
31  
32  
33  
34  
35  
36  
37  
38  
39  
40  
41  
42  
43  
44  
45  
46  
47  
48  
49  
50  
51  
52  
53  
54  
55  
56  
57  
58  
59  
60

For peer review only

## REFERENCES

1. World Health Organisation Global strategy on human resources for health: Workforce 2030. Draft (2015) Accessed last 12-09-2016  
[http://www.who.int/hrh/resources/pub\\_globstrathrh-2030/en/](http://www.who.int/hrh/resources/pub_globstrathrh-2030/en/)
2. World Health Organisation. Task shifting: rational redistribution of tasks among health workforce teams - global recommendations and guidelines. Geneva: World Health Organisation; 2008.
3. Mittman DE, Cawley JF, Fenn WH. Physician assistants in the United States. *BMJ* 2002;325:485-487.
4. AAPA. 2013 Annual Survey Report. Accessed March 22 2017 at [https://www.aapa.org/wp-content/uploads/2016/12/Annual\\_Server\\_Data\\_Tables-S.pdf](https://www.aapa.org/wp-content/uploads/2016/12/Annual_Server_Data_Tables-S.pdf)
5. AAPA. What is a PA? Accessed March 22 2017 at <https://www.aapa.org/what-is-a-pa/>
6. Hooker RS, Hogan K, Leeker E. The globalization of the physician assistant profession. *J Physician Assist Educ* 2007;18:76–85.
7. Health Education England. HEE Business Plan 2015/16. 201515. Accessed 02-09-2016 <https://hee.nhs.uk/sites/default/files/documents/HEE-Business-Plan-2015-16.pdf>
8. Healthforce Ontario 2009 Ontario's Physician Assistant Initiative: An Overview. Accessed on 13-09-2016 at [http://www.healthforceontario.ca/en/M4/Ontario%27s\\_Physician\\_Assistant\\_Initiative](http://www.healthforceontario.ca/en/M4/Ontario%27s_Physician_Assistant_Initiative)



- 1  
2  
3 9. Synergia Limited. 2015. Phase II of the Physician Assistant Demonstrations  
4  
5 Evaluation Report: Report for Health Workforce New Zealand. Wellington: Ministry  
6  
7 of Health. Accessed last 2-9-2016 at [http://www.health.govt.nz/publication/phase-ii-](http://www.health.govt.nz/publication/phase-ii-physician-assistant-demonstrations-evaluation-report)  
8  
9 [physician-assistant-demonstrations-evaluation-report](http://www.health.govt.nz/publication/phase-ii-physician-assistant-demonstrations-evaluation-report)  
10
- 11  
12 10. U.S. Department of Health and Human Services Health Resources and Services  
13  
14 Administration. National Center for Health Workforce Analysis. The U.S. Health  
15  
16 workforce chartbook. 2013 Accessed last on 13-09-2016 at  
17  
18 [http://bhpr.hrsa.gov/healthworkforce/supplydemand/usworkforce/chartbook/chartboo](http://bhpr.hrsa.gov/healthworkforce/supplydemand/usworkforce/chartbook/chartbookpart1.pdf)  
19  
20 [kpart1.pdf](http://bhpr.hrsa.gov/healthworkforce/supplydemand/usworkforce/chartbook/chartbookpart1.pdf)  
21  
22
- 23  
24 11. Velde FVD, Windt WVD. Alumni van de masteropleiding Physician Assistant.  
25  
26 Utrecht: Kiwa Prismant; 2013. Cited in Timmermans MJ, van Vught AJ, Wensing M,  
27  
28 Laurant MG. The effectiveness of substitution of hospital ward care from medical  
29  
30 doctors to physician assistants: a study protocol. *BMC Health Serv Res* 2014;14:43.  
31  
32 doi: 10.1186/1472-6963-14-43.  
33  
34
- 35  
36 12. Ross N, Parle J, Begg P, Kuhns D. The case for the physician assistant. *Clin Med*  
37  
38 2012;12:200-6.  
39
- 40  
41 13. Hooker RS, Everett CM. The contributions of physician assistants in primary care  
42  
43 systems. *Health Soc Care Community* 2012;20–31.
- 44  
45 14. Halter M, Drennan V, Chattopadhyay K, et al. The contribution of physician  
46  
47 assistants in primary care: a systematic review. *BMC Health Serv Res* 2013;18:223.  
48  
49 doi: 10.1186/1472-6963-13-223.
- 50  
51 15. Doan Q, Sabhaney V, Kissoon N, et al. A systematic review: the role and impact of  
52  
53 the physician assistant in the emergency department. *Emerg Med Australas*  
54  
55 2011;23:7-15.  
56  
57  
58  
59

- 1  
2  
3 16. Ritsema TS. Faculty of Physician Associates Census Results 2016. Accessed 10  
4  
5 September 2017 at <http://www.fparcp.co.uk/about-fpa/fpa-census>  
6  
7
- 8 17. Merkle F, Ritsema TS, Bauer S, Kuilman L. The physician assistant: Shifting the  
9  
10 Paradigm of European medical practice? *HSR Proc Intensive Care Cardiovasc Anesth*  
11  
12 2011;3:255-262.  
13
- 14 18. Moher D, Liberati A, Tetzlaff J et al. The PRISMA Group. Preferred reporting items  
15  
16 for systematic reviews and meta-analyses: the PRISMA statement. *J Clin Epidemiol*  
17  
18 2009;62:1006–12.  
19
- 20 19. Halter M, Wheeler C, Drennan V, et al. Evidence of impact of physician associates in  
21  
22 secondary care: a systematic mixed studies review. PROSPERO  
23  
24 2016:CRD42016032895. Accessed on 10 September  
25  
26 at 2017 [http://www.crd.york.ac.uk/PROSPERO/display\\_record.asp?ID=CRD42016032](http://www.crd.york.ac.uk/PROSPERO/display_record.asp?ID=CRD42016032895)  
27  
28 [895](http://www.crd.york.ac.uk/PROSPERO/display_record.asp?ID=CRD42016032895).  
29  
30
- 31 20. Greenhalgh T, Peacock R. Effectiveness and efficiency of search methods in  
32  
33 systematic reviews of complex evidence: audit of primary sources. *BMJ* 2005;  
34  
35 331:1064–1065  
36  
37
- 38 21. Department of Health. The Competence and Curriculum Framework for the Physician  
39  
40 Assistant. London: Department of Health 2006.  
41
- 42 22. Maxwell R. Dimensions of quality revisited: from thought to action. *Qual Health*  
43  
44 *Care* 1992;1:171-177.  
45  
46
- 47 23. Department of Health. High Quality Care For All NHS Next Stage Review Final  
48  
49 Report. 2008.  
50  
51 [https://www.gov.uk/government/uploads/system/uploads/attachment\\_data/file/228836](https://www.gov.uk/government/uploads/system/uploads/attachment_data/file/228836/7432.pdf)  
52  
53 [/7432.pdf](https://www.gov.uk/government/uploads/system/uploads/attachment_data/file/228836/7432.pdf) Accessed 10 December 2015.  
54  
55  
56  
57  
58  
59  
60

- 1  
2  
3 24. International Monetary Fund. Table B1. Advanced Economies: Unemployment,  
4  
5 Employment, and Real GDP per Capita.  
6  
7 <https://www.imf.org/external/pubs/ft/weo/2015/01/pdf/tblpartb.pdf> Accessed on 14  
8  
9 December 2015.  
10  
11 25. Kmet LM, Lee RC, Cook LS. Standard quality assessment criteria for evaluating  
12  
13 primary research papers from a variety of fields. *Alberta Herit Found Med Res*  
14  
15 2004;13:1–11. <http://files.deslibris.ca/cppc/200/200548.pdf> Accessed November 24  
16  
17 2015.  
18  
19 26. Pluye P, Robert E, Cargo M, et al. Proposal: A mixed methods appraisal tool for  
20  
21 systematic mixed studies reviews. 2011. Retrieved on 24 November 2015 from  
22  
23 <http://mixedmethodsappraisaltoolpublic.pbworks.com>  
24  
25  
26 27. Centre for Reviews and Dissemination, University of York. Systematic Reviews.  
27  
28 CRD's guidance for undertaking reviews in healthcare. 2009.  
29  
30 28. Thomas J, Harden A: Methods for the thematic synthesis of qualitative research in  
31  
32 systematic reviews. *BMC Med Res Meth* 2008;8:45.  
33  
34  
35 29. Popay J, Roberts H, Sowden A, et al. Guidance on the conduct of narrative synthesis  
36  
37 in systematic reviews. ESRC Research Methods Programme. 2006.  
38  
39  
40 30. Noyes J & Lewin S. Chapter 6: Supplemental Guidance on Selecting a Method of  
41  
42 Qualitative Evidence Synthesis, and Integrating Qualitative Evidence with Cochrane  
43  
44 Intervention Reviews. In: Noyes J, Booth A, Hannes K, et al (editors), Supplementary  
45  
46 Guidance for Inclusion of Qualitative Research in Cochrane Systematic Reviews of  
47  
48 Interventions. Version 1 (updated August 2011). Cochrane Collaboration Qualitative  
49  
50 Methods Group, 2011. Available from URL [http://cqrng.cochrane.org/supplemental-](http://cqrng.cochrane.org/supplemental-handbook-guidance)  
51  
52 [handbook-guidance](http://cqrng.cochrane.org/supplemental-handbook-guidance) Last accessed January 2015.  
53  
54  
55  
56  
57  
58  
59  
60

- 1  
2  
3 31. Arnopolin SL, Smithline HA. Patient care by physician assistants and by physicians in  
4  
5 an emergency department. *JAAPA* 2000;13:39-40, 49-50, 53-4 passim.  
6
- 7 32. Ducharme J, Alder RJ, Pelletier C, et al. The impact on patient flow after the  
8  
9 integration of nurse practitioners and physician assistants in 6 Ontario emergency  
10  
11 departments. *CJEM*. 2009;11:455-461.  
12
- 13 33. Hooker RS, Cipher DJ, Cawley JF, et al. Emergency medicine services:  
14  
15 Interprofessional care trends. *J Interprof Care* 2009;22: 167-178.  
16
- 17 34. Kozlowski MJ, Wiater JG, Pasqual RG, et al. Painful discrimination: The differential  
18  
19 use of analgesia in isolated lower limb injuries. *Am J Emerg Med*.2002;20:502-5.  
20  
21
- 22 35. Ritsema TS, Kelen GD, Pronovost PJ, et al. The National Trend in Quality of  
23  
24 Emergency Department Pain Management for Long Bone Fractures. *Acad Emerg*  
25  
26 *Med* 2007;14:163-9.  
27
- 28 36. Singer AJ, Hollander JE, Cassara G, et al. Level of training, wound care practices, and  
29  
30 infection rates. *Am J Emerg Med* 1995;13:265-8.  
31  
32
- 33 37. Althausen PL, Shannon S, Owens B, et al. Impact of hospital-employed physician  
34  
35 assistants on a level II community-based orthopaedic trauma system. *J Orthop*  
36  
37 *Trauma*. 2013;27:e87-91. doi: 10.1097/BOT.0b013e3182647f29.  
38
- 39 38. Bohm ER, Dunbar M, Pitman D, et al. Experience with physician assistants in a  
40  
41 Canadian arthroplasty program. *Can J Sur*. 2010;53:103-8.  
42  
43
- 44 39. Mains C Scarborough K, Baror R, et al. Staff commitment to trauma care improves  
45  
46 mortality and length of stay at a level i trauma center. *J Trauma* 2009;66:1315-20.  
47  
48 doi: 10.1097/TA.0b013e31819d96d8.  
49
- 50 40. Oswanski MF, Sharma OP, Raj SS. Comparative review of use of physician assistants  
51  
52 in a level I trauma center. *Am Surg* 2004 Mar;70:272-9.  
53  
54  
55  
56  
57  
58

- 1  
2  
3 41. Van Rhee J, Ritchie J, Eward A. Resource use by physician assistant services versus  
4 teaching services *JAAPA* 2002;15:33-8,40,42.  
5  
6  
7 42. Greenland S, Robins JM, Pearl J. Confounding and collapsibility in causal inference.  
8  
9 *Statistical Science* 14:29-46.  
10  
11 [http://www.biostat.harvard.edu/robins/publications/Confounding\\_and\\_collapsibility.p](http://www.biostat.harvard.edu/robins/publications/Confounding_and_collapsibility.pdf)  
12 [df](http://www.biostat.harvard.edu/robins/publications/Confounding_and_collapsibility.pdf)] Accessed March 30th 2017.  
13  
14  
15 43. Greenland S, Pearl J, Robins JM. Causal diagrams for epidemiological research.  
16  
17 *Epidemiology* 1999;10:37-48.  
18  
19 <http://www.biostat.harvard.edu/robins/publications/causaldia.pdf>] Accessed March  
20  
21 30th 2017.  
22  
23  
24 44. Hoskins R. Evaluating new roles within emergency care: a literature review. *Int*  
25  
26 *Emerg Nurs* 2011;19):125-40. doi: 10.1016/j.ienj.2010.09.003.  
27  
28  
29 45. Saxon K, London K, Bacharouch A, et al. Patients' Perceptions of Waiting Times and  
30  
31 the Effect on Patient Satisfaction in the Emergency Department. *Ann Emer Med*  
32  
33 2013;62,4 Supplement:S82  
34  
35 46. Ross N, Parle J, Begg P et al. The case for the physician assistant. *Clinical Medicine*  
36  
37 2012;12:200-6.  
38  
39 47. Wheeler C, Halter M, Drennan VM, et al. Physician associates working in secondary  
40  
41 care teams in England: Interprofessional implications from a national survey. *J*  
42  
43 *Interprof Care* 2017;6:1-3. doi: 10.1080/13561820.2017.1341390.  
44  
45  
46 48. Halter M, Wheeler C, Drennan V, et al. Physician Associates in England's hospitals: a  
47  
48 survey of medical directors exploring current usage and supporting/inhibiting factors  
49  
50 to their recruitment. *Clin Med* 2017;17:126-131. doi: 10.7861/clinmedicine.17-2-126.  
51  
52 49. Ritsema T. (2016) Faculty of Physician Associates Census Results 2016. Accessed  
53  
54 last 1-11-2016 at <http://www.fparcp.co.uk/censusresults>  
55  
56  
57  
58  
59  
60

- 1  
2  
3 50. Lind S. Physician associate legislation waiting for 'parliamentary slot', says Jeremy  
4  
5 Hunt. Pulse, 21 December 2016. [http://www.pulsetoday.co.uk/your-](http://www.pulsetoday.co.uk/your-practice/regulation/physician-associate-legislation-waiting-for-parliamentary-slot-says-jeremy-hunt/20033474.article)  
6  
7 [practice/regulation/physician-associate-legislation-waiting-for-parliamentary-slot-](http://www.pulsetoday.co.uk/your-practice/regulation/physician-associate-legislation-waiting-for-parliamentary-slot-says-jeremy-hunt/20033474.article)  
8  
9 [says-jeremy-hunt/20033474.article](http://www.pulsetoday.co.uk/your-practice/regulation/physician-associate-legislation-waiting-for-parliamentary-slot-says-jeremy-hunt/20033474.article) Accessed 7<sup>th</sup> Feb 2017.  
10  
11 51. Department of Health and The Rt Hon Jeremy Hunt MP. New Deal for General  
12  
13 Practice, <https://www.gov.uk/government/speeches/new-deal-for-general-practice>  
14  
15 (2015, accessed 8<sup>th</sup> August 2016).  
16  
17 52. Health Education England. Medical Associate Professionals.  
18  
19 [https://hee.nhs.uk/printpdf/our-work/developing-our-workforce/medical-associate-](https://hee.nhs.uk/printpdf/our-work/developing-our-workforce/medical-associate-professions)  
20  
21 [professions](https://hee.nhs.uk/printpdf/our-work/developing-our-workforce/medical-associate-professions). Accessed 7 February 2017.  
22  
23 53. Timmermans MJC, van Vught AJAH, Van den Berg M, et al. Physician assistants in  
24  
25 medical ward care: a descriptive study of the situation in the Netherlands. *J Eval Clin*  
26  
27 *Pract* 2016;22:395-402.  
28  
29 54. Timmermans MJC, van den Brink GT, van Vught AJAH, et al. The involvement of  
30  
31 physician assistants in inpatient care in hospitals in the Netherlands: a cost-  
32  
33 effectiveness analysis. *BMJ Open*. 2017;7:e016405. doi: 10.1136/bmjopen-2017-  
34  
35 016405.  
36  
37 55. Fletcher A, Jamal F, Moore G, et al. Realist complex intervention science: Applying  
38  
39 realist principles across all phases of the Medical Research Council framework for  
40  
41 developing and evaluating complex interventions. *Evaluation* 2016;22:286-303  
42  
43 56. Moore GF, Audrey S, Barker M, et al. Process evaluation of complex interventions:  
44  
45 Medical Research Council guidance. *BMJ* 2015;350:p.h1258.  
46  
47  
48  
49  
50  
51  
52  
53  
54  
55  
56  
57  
58  
59  
60

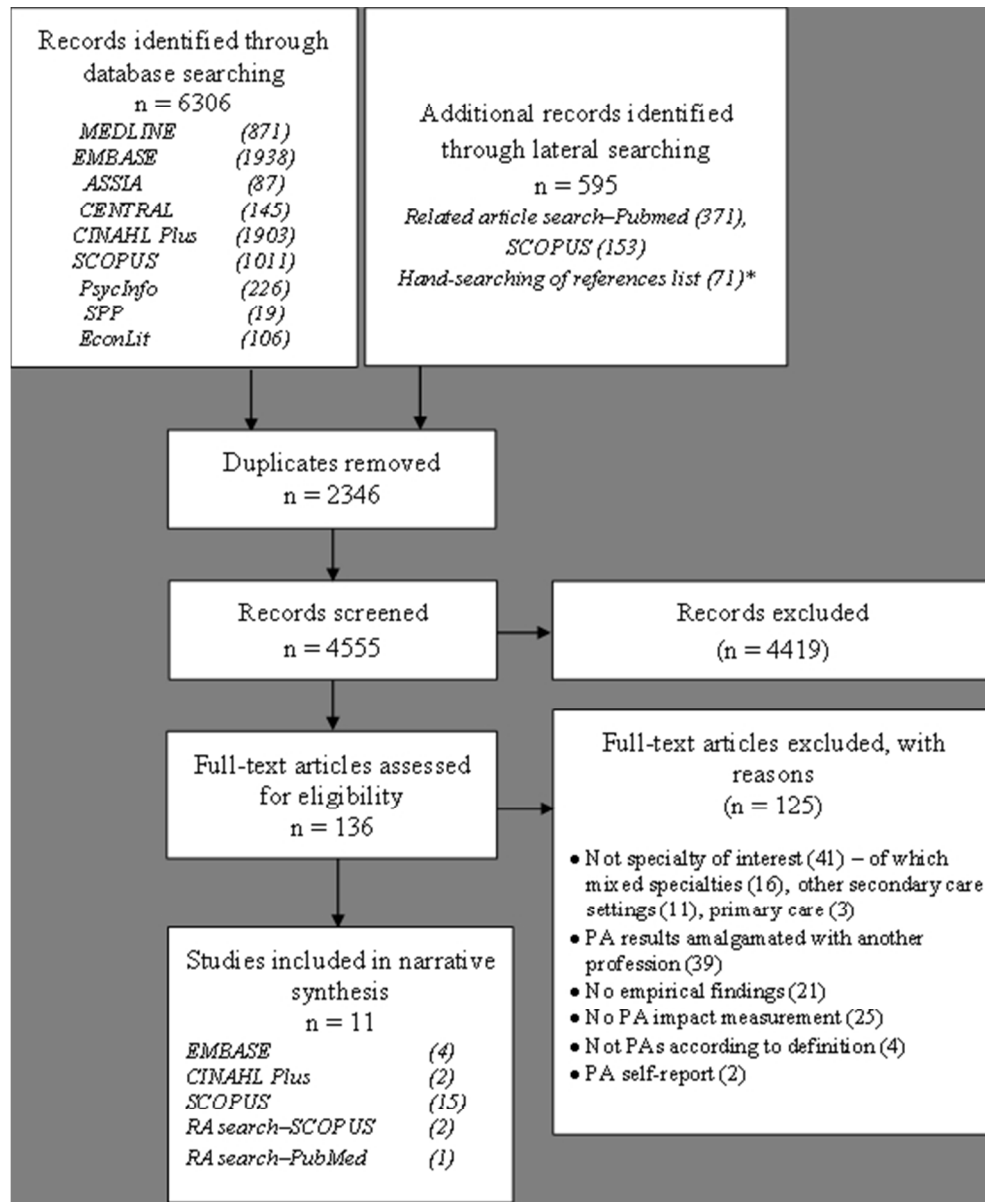

Figure 1: PRISMA flow chart

154x187mm (96 x 96 DPI)

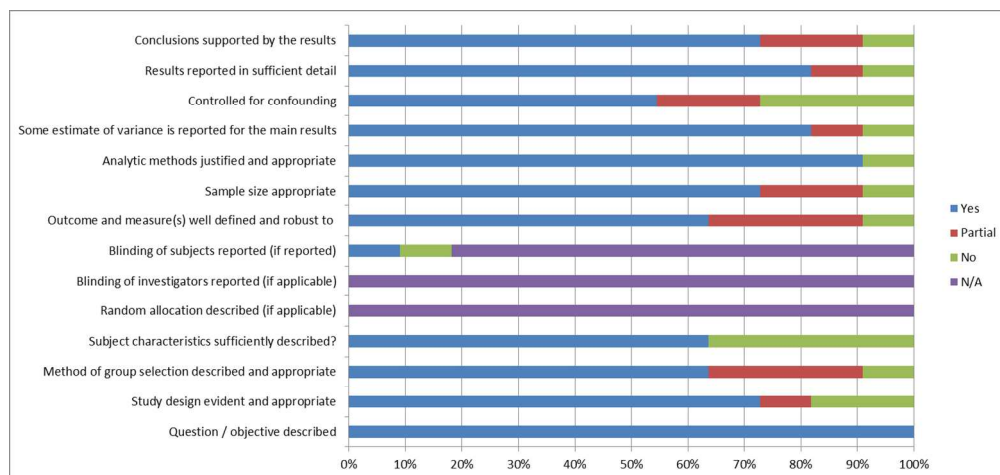

Figure 2: 'Risk of bias' graph: review authors' judgements about each risk of bias item presented as percentages across all included studies

Peer review only



1  
2  
3  
4  
5  
6  
7  
8  
9  
10  
11  
12  
13  
14  
15  
16  
17  
18  
19  
20  
21  
22  
23  
24  
25  
26  
27  
28  
29  
30  
31  
32  
33  
34  
35  
36  
37  
38  
39  
40  
41  
42  
43  
44  
45  
46  
47

**SUPPLEMENTARY FILE 1: Scoping review (Preliminary Medline search strategy – 24/11/2015)**

| #  | Concept                       | Search Terms                                                                                                                                                  | Results |
|----|-------------------------------|---------------------------------------------------------------------------------------------------------------------------------------------------------------|---------|
| 1  |                               | exp Physician Assistants/                                                                                                                                     | 2410    |
| 2  |                               | exp Pediatric Assistants/                                                                                                                                     | 26      |
| 3  |                               | Physician Assistant\$.tw.                                                                                                                                     | 1498    |
| 4  |                               | Feldsher\$.tw.                                                                                                                                                | 17      |
| 5  |                               | Clinical Officer\$.tw.                                                                                                                                        | 135     |
| 6  | <b>Physician Associates</b>   | Paramedical Practitioner&.tw.                                                                                                                                 | 0       |
| 7  |                               | Medical Assistant\$.tw.                                                                                                                                       | 324     |
| 8  |                               | Allied Health Personnel.tw.                                                                                                                                   | 48      |
| 9  |                               | physician associate\$.tw.                                                                                                                                     | 37      |
| 10 |                               | (mid level adj3 provider\$.tw.                                                                                                                                | 124     |
| 11 |                               | ((assistant* or technician* or officer* or associate\$) adj2 (physician\$ or surgical or clinical\$ or practitioner\$ or medical\$ or provider\$)).tw.        | 24985   |
| 12 |                               | exp Emergency Medicine/ and (speciali?ed or specialty or hospital\$ or secondary or care or medicine).tw.                                                     | 4983    |
| 13 | <b>Emergency Medicine</b>     | ((accident and emergency) or A&E department or emergency department or casualty or emergency Medicine).tw.                                                    | 47842   |
| 14 |                               | (emergency adj3 (medic* or servic* or ward* or department)).tw.                                                                                               | 54262   |
| 15 |                               | (exp critical care/ or exp intensive care/) and (speciali?ed or specialty or hospital\$ or secondary or care or medicine).tw.                                 | 23791   |
| 16 |                               | ((intensive adj3 care) and (speciali?ed or specialty or hospital\$ or secondary or care or medicine)).tw.                                                     | 71552   |
| 17 |                               | exp Internal Medicine/ and (speciali?ed or specialty or hospital\$ or secondary or care or medicine).tw.                                                      | 16968   |
| 18 | <b>Secondary Care</b>         | (internal medicine and (speciali?ed or specialty or hospital\$ or secondary or care or medicine)).tw.                                                         | 10752   |
| 19 |                               | (Acute Medicine or acute internal medicine or acute medical unit\$ or medical assessment unit\$ or acute ward\$).tw.                                          | 690     |
| 20 | <b>Trauma or Orthopaedics</b> | (exp Orthopedics/ or exp Traumatology/) and (speciali?ed or specialty or hospital\$ or secondary or care or medicine).tw.                                     | 3015    |
| 21 |                               | ((Trauma or Orthop?dic\$) adj3 (speciali?ed or specialty or hospital\$ or secondary or care or medicine)).tw.                                                 | 7280    |
| 22 |                               | (Orthop?dic surgery or trauma surgery).tw.                                                                                                                    | 4466    |
| 23 |                               | ((bone\$ or joint\$ or ligament\$ or tendon\$ or muscle\$ or nerve\$) adj3 (operation\$ or surgery or replacement\$)).tw.                                     | 13668   |
| 24 | <b>Care of the Elderly</b>    | (exp geriatrics/ or Aging/ or exp Aged/ or older people.mp. or exp Frail Elderly/) and (speciali?ed or specialty or hospital\$ or secondary or care).tw.      | 361294  |
| 25 |                               | ((Older adult or Aged or elderly or geriatric* or older people* or ag?ng) adj3 (speciali?ed or specialty or hospital\$ or secondary or care or medicine)).tw. | 15561   |

|    |    |                                                                                                                                          |        |
|----|----|------------------------------------------------------------------------------------------------------------------------------------------|--------|
| 1  |    |                                                                                                                                          |        |
| 2  |    |                                                                                                                                          |        |
| 3  |    |                                                                                                                                          |        |
| 4  |    |                                                                                                                                          |        |
| 5  | 26 | or/12-25                                                                                                                                 | 508965 |
| 6  | 27 | exp Primary Health Care/ or exp preventive medicine/ or exp physicians, Primary Care/                                                    | 75166  |
| 7  | 28 | (primary care or primary healthcare or primary health care or primary health service\$.tw.                                               | 68593  |
| 8  | 29 | 27 or 28                                                                                                                                 | 111510 |
| 9  | 30 | <b>Primary</b> exp Family Practice/ or exp Physicians, Family/ or exp General Practitioners/ or exp General Practice/                    | 47498  |
| 10 | 31 | <b>care</b> (family practice\$ or family practitioner\$ or family physician\$ family medicine\$ or General practice\$ or General         | 47129  |
| 11 |    | practitioner\$ or GPs).tw.                                                                                                               |        |
| 12 | 32 | 30 or 31                                                                                                                                 | 72038  |
| 13 | 33 | 29 not 32                                                                                                                                | 91680  |
| 14 | 34 | <b>Outpatie</b> (exp Outpatients/ or Outpatient Clinics, Hospital/ or ambulatory care/) and (speciali?ed or specialty or hospital\$ or   | 18427  |
| 15 |    | <b>nt and</b> secondary or care or medicine).tw.                                                                                         |        |
| 16 | 35 | <b>inpatient</b> (exp Inpatients/ or Hospitalization/) and (speciali?ed or specialty or hospital\$ or secondary or care or medicine).tw. | 49797  |
| 17 | 36 | <b>care</b> (ambulatory care or ambulatory emergency care).tw.                                                                           | 3948   |
| 18 | 37 | ((outpatient\$ or out-patient\$) adj3 (speciali?ed or specialty or hospital\$ or secondary or care or medicine)).tw.                     | 11455  |
| 19 | 38 | ((inpatient\$ or in-patient\$) adj3 (speciali?ed or specialty or hospital\$ or secondary or care or medicine)).tw.                       | 24157  |
| 20 | 39 | Treatment Outcome/ or "Outcome and Process Assessment (Health Care)"/ or "Outcome Assessment (Health                                     | 769470 |
| 21 |    | Care)"/ or Medical Audit/ or Program Evaluation/                                                                                         |        |
| 22 | 40 | exp Patient Readmission/ or exp Length of Stay/ or exp Clinical Audit/ or exp Medical Audit/                                             | 68267  |
| 23 | 41 | Health Planning/ and (organi?ation* or system* or hospital* or Physician* or workforce or staff or                                       | 2686   |
| 24 |    | professional*).tw.                                                                                                                       |        |
| 25 | 42 | Efficiency, Organizational/ and (organi?ation* or system* or hospital* or Physician* or workforce or staff or                            | 8952   |
| 26 |    | professional*).tw.                                                                                                                       |        |
| 27 | 43 | Resource Allocation/ and (organi?ation* or system* or hospital* or Physician* or workforce or staff or                                   | 1377   |
| 28 |    | professional*).tw.                                                                                                                       |        |
| 29 | 44 | <b>Impact</b> Health Personnel/ and (organi?ation* or system* or hospital* or Physician* or workforce or staff or                        | 11958  |
| 30 |    | professional*).tw.                                                                                                                       |        |
| 31 | 45 | Health Manpower/ and (organi?ation* or system* or hospital* or Physician* or workforce or staff or                                       | 2123   |
| 32 |    | professional*).tw.                                                                                                                       |        |
| 33 | 46 | Medical Staff/ and (organi?ation* or system* or hospital* or Physician* or workforce or staff or professional*).tw.                      | 899    |
| 34 | 47 | Delivery of Health Care/ and (productivity or efficiency or performance or guideline* or quality).tw.                                    | 8411   |
| 35 | 48 | ((equity or difference\$ disparit\$ or inequalit\$ or inequit\$) adj5 (experience\$ or perception\$ or view\$ or rates or                | 2048   |
| 36 |    | rating or review or audit or impact or influence or effect or outcome or performance or quality)).tw.                                    |        |
| 37 |    | ((Acceptability or compassion or dignity or satisfaction or dissatisfaction) adj5 (experience\$ or perception\$ or                       |        |
| 38 | 49 | view\$ or rates or rating or review or audit or impact or influence or effect or outcome or performance or                               | 16604  |
| 39 |    | quality)).tw.                                                                                                                            |        |
| 40 |    |                                                                                                                                          |        |
| 41 |    |                                                                                                                                          |        |
| 42 |    |                                                                                                                                          |        |
| 43 |    |                                                                                                                                          |        |
| 44 |    |                                                                                                                                          |        |
| 45 |    |                                                                                                                                          |        |
| 46 |    |                                                                                                                                          |        |
| 47 |    |                                                                                                                                          |        |

1  
2  
3  
4  
5  
6  
7  
8  
9  
10  
11  
12  
13  
14  
15  
16  
17  
18  
19  
20  
21  
22  
23  
24  
25  
26  
27  
28  
29  
30  
31  
32  
33  
34  
35  
36  
37  
38  
39  
40  
41  
42  
43  
44  
45  
46  
47

50  
51  
52  
53  
54  
55  
56  
57  
58  
59  
60

**Impact in  
Secondary Care  
of Physician  
Associates**

|                                                                                                                                                                                                                          |        |
|--------------------------------------------------------------------------------------------------------------------------------------------------------------------------------------------------------------------------|--------|
| ((Efficiency or productivity or economic\$ or benefit) adj5 (experience\$ or perception\$ or view\$ or rates or rating or review or audit or impact or influence or effect or outcome or performance or quality)).tw.    | 34565  |
| ((Effectiveness or efficacy or effectivity or capability) adj5 (experience\$ or perception\$ or view\$ or rates or rating or review or audit or impact or influence or effect or outcome or performance or quality)).tw. | 35758  |
| ((Effectiveness or efficacy or effectivity or capability) adj5 (experience\$ or perception\$ or view\$ or rates or rating or review or audit or impact or influence or effect or outcome or performance or quality)).tw. | 35758  |
| ((Access\$ or responsiveness or timely or timeliness) adj5 (experience\$ or perception\$ or view\$ or rates or rating or review or audit or impact or influence or effect or outcome or performance or quality)).tw.     | 16251  |
| ((Appropriate\$ or relevance or relevant) adj5 (experience\$ or perception\$ or view\$ or rates or rating or review or audit or impact or influence or effect or outcome or performance or quality)).tw.                 | 32405  |
| ((Cost\$ or afford\$ value for money or financ\$) adj5 (experience\$ or perception\$ or view\$ or rates or rating or review or audit or impact or influence or effect or outcome or performance or quality)).tw.         | 33373  |
| or/1-11                                                                                                                                                                                                                  | 26515  |
| 26 or 33 or 34 or 35 or 36 or 37 or 38                                                                                                                                                                                   | 621770 |
| or/39-55                                                                                                                                                                                                                 | 959419 |
| 56 and 57 and 58                                                                                                                                                                                                         | 1575   |
| limit 59 to (english language and last 20 years)                                                                                                                                                                         | 1513   |

PA-SCer systematic review narrative synthesis: first draft T&O and internal med 160806

1  
2  
3  
4 **SUPPLEMENTARY FILE 1 continued: MeSH --Medical Subject Headings definition of search**  
5 **terms used**

6  
7  
8 (alphabetical [US spellings])  
9

10 <http://www.ncbi.nlm.nih.gov/mesh>  
11

12  
13 **Aged:** A person 65 through 79 years of age. For a person older than 79 years, AGED, 80 AND OVER  
14 is available. Year introduced: 1966. By exploding this term, we do include MeSH terms found below  
15 it in the MeSH hierarchy as follows: Aged, 80 and over; Frail Elderly.  
16  
17

18 **Ageing:** The gradual irreversible changes in structure and function of an organism that occur as a result  
19 of the passage of time. By exploding this term, we do include MeSH terms found below it in the  
20 MeSH hierarchy as follows: Longevity.  
21  
22

23  
24 **Ambulatory care:** Health care services provided to patients on an ambulatory basis, rather than by  
25 admission to a hospital or other health care facility. The services may be a part of a hospital,  
26 augmenting its inpatient services, or may be provided at a free-standing facility. Year introduced:  
27 1968(1966)  
28  
29

30  
31 **Behavioral Disciplines and Activities:** The specialties in psychiatry and psychology, their diagnostic  
32 techniques and tests, their therapeutic methods, and psychiatric and psychological services. Year  
33 introduced: 1998  
34  
35

36  
37 **Clinical Audit:** A detailed review and evaluation of selected clinical records by qualified professional  
38 personnel to improve the quality of patient care and outcomes. The clinical audit was formally  
39 introduced in 1993 into the United Kingdom's National Health Service. Year introduced: 2008  
40  
41

42 **Critical Care:** Health care provided to a critically ill patient during a medical emergency or crisis.  
43 Year introduced: 1975  
44

45 **Emergency medicine:** The branch of medicine concerned with the evaluation and initial treatment of  
46 urgent and emergent medical problems, such as those caused by accidents, trauma, sudden illness,  
47 poisoning, or disasters. Emergency medical care can be provided at the hospital or at sites outside the  
48 medical facility.  
49  
50

51  
52 **Family Practice:** A medical specialty concerned with the provision of continuing, comprehensive  
53 primary health care for the entire family.  
54  
55

PA-SCer systematic review narrative synthesis: first draft T&O and internal med 160806

1  
2  
3 **Frail Elderly:** Older adults or aged individuals who are lacking in general strength and are unusually  
4 susceptible to disease or to other infirmity. Year introduced: 1991  
5

6 **General Practice:** Patient-based medical care provided across age and gender or specialty  
7 boundaries. Year introduced: 2011  
8  
9

10 **General Practitioners:** Physicians whose practice is not restricted to a specific field of medicine  
11

12 **Geriatrics:** The branch of medicine concerned with the physiological and pathological aspects of the  
13 aged, including the clinical problems of senescence and senility.  
14  
15

16 **Hospitalization:** The confinement of a patient in a hospital.  
17

18 **Inpatients:** Persons admitted to health facilities which provide board and room, for the purpose of  
19 observation, care, diagnosis or treatment.  
20  
21

22 **Intensive care:** Advanced and highly specialized care provided to medical or surgical patients whose  
23 conditions are life-threatening and require comprehensive care and constant monitoring. It is usually  
24 administered in specially equipped units of a health care facility. Year introduced: 1992  
25  
26

27 **Internal Medicine:** A medical specialty concerned with the diagnosis and treatment of diseases of the  
28 internal organ systems of adults. By exploding this term, we do include MeSH terms found below it in  
29 the MeSH hierarchy as follows: Cardiology; Cardiac electrophysiology; Endocrinology;  
30 Gastroenterology; Hematology; Transfusion Medicine; Infectious Disease Medicine; Medical  
31 Oncology Radiation; Oncology; Nephrology; Pulmonary Medicine; Rheumatology; Sleep Medicine  
32 Specialty.  
33  
34  
35  
36

37 **Medical Audit:** A detailed review and evaluation of selected clinical records by qualified professional  
38 personnel for evaluating quality of medical care. Year introduced: 1968  
39  
40

41 **Mental Disorders:** Psychiatric illness or diseases manifested by breakdowns in the adaptational  
42 process expressed primarily as abnormalities of thought, feeling, and behavior producing either  
43 distress or impairment of function. Year introduced: use pre-explosion 1974-1997  
44  
45  
46

47 **Mental Health Services:** Organized services to provide **mental health** care. Year introduced: 1967  
48 Mental Health: The state wherein the person is well adjusted. Year introduced: 1967  
49  
50

51 **Orthopedics:** A surgical specialty which utilizes medical, surgical, and physical methods to treat and  
52 correct deformities, diseases, and injuries to the skeletal system, its articulations, and associated  
53 structures.  
54  
55  
56  
57  
58  
59  
60

PA-SCer systematic review narrative synthesis: first draft T&O and internal med 160806

1  
2  
3  
4  
5 **Outcome and Process Assessment (Health Care):** Evaluation procedures that focus on both the  
6 outcome or status (OUTCOMES ASSESSMENT) of the patient at the end of an episode of care -  
7 presence of symptoms, level of activity, and mortality; and the process (ASSESSMENT, PROCESS) -  
8 what is done for the patient diagnostically and therapeutically. Year introduced: 1979. By exploding  
9 this term, we do include MeSH terms found below it in the MeSH hierarchy as follows: Outcome  
10 Assessment (Health Care); Patient Outcome Assessment; Treatment Outcome; Process Assessment  
11 (Health Care)  
12  
13  
14  
15

16 **Outcome Assessment (Health Care):** Research aimed at assessing the quality and effectiveness of  
17 health care as measured by the attainment of a specified end result or outcome. Measures include  
18 parameters such as improved health, lowered morbidity or mortality, and improvement of abnormal  
19 states (such as elevated blood pressure). Year introduced: 1992  
20  
21  
22

23 **Outpatient Clinics, Hospital:** Organized services in a hospital which provide medical care on an  
24 outpatient basis. Year introduced: 1978  
25

26 **Outpatients:** Persons who receive ambulatory care at an outpatient department or clinic without room  
27 and board being provided. Year introduced: 1991(1980)  
28  
29

30 **Pediatric Assistants:** Persons academically trained to provide medical care, under the supervision of  
31 a physician, to infants and children. Year introduced: 1991(1975)  
32  
33

34 **Physician Assistants:** Health professionals who practice medicine as members of a team with their  
35 supervising physicians. They deliver a broad range of medical and surgical services to diverse  
36 populations in rural and urban settings. Duties may include physical exams, diagnosis and treatment  
37 of disease, interpretation of tests, assist in surgery, and prescribe medications. (from  
38 <http://www.aapa.org/about-pas> accessed 21/4/2011) Year introduced: 1995  
39  
40  
41

42 **Physicians, Family:** Those physicians who have completed the education requirements specified by  
43 the American Academy of Family Physicians. Year introduced: 1974(1972)  
44  
45

46 **Physicians, Primary Care:** Providers of initial care for patients. These PHYSICIANS refer patients  
47 when appropriate for secondary or specialist care. Year introduced: 2011  
48  
49

50 **Preventive medicine:** A medical specialty primarily concerned with prevention of disease  
51 (PRIMARY PREVENTION) and the promotion and preservation of health in the individual. By  
52 exploding this term, we do include MeSH terms found below it in the MeSH hierarchy as follows:  
53 Environmental Medicine; Occupational Medicine; Preventive Psychiatry.  
54  
55  
56  
57  
58  
59  
60

PA-SCer systematic review narrative synthesis: first draft T&O and internal med 160806

1  
2  
3  
4  
5 **Primary Health Care:** Care which provides integrated, accessible health care services by clinicians  
6 who are accountable for addressing a large majority of personal health care needs, developing a  
7 sustained partnership with patients, and practicing in the context of family and community. (JAMA  
8 1995;273(3):192) Year introduced: 1974(1972).  
9  
10

11 **Program Evaluation:** Studies designed to assess the efficacy of programs. They may include the  
12 evaluation of cost-effectiveness, the extent to which objectives are met, or impact. Year introduced:  
13 1989. By exploding this term, we do include MeSH terms found below it in the MeSH hierarchy as  
14 follows: benchmarking.  
15  
16  
17

18 **Psychiatry:** The medical science that deals with the origin, diagnosis, prevention, and treatment of  
19 mental disorders.  
20  
21  
22

23 **Traumatology:** The medical specialty which deals with wounds and injuries as well as resulting  
24 disability and disorders from physical traumas.  
25  
26

27 **Treatment Outcome:** Evaluation undertaken to assess the results or consequences of management  
28 and procedures used in combating disease in order to determine the efficacy, effectiveness, safety, and  
29 practicability of these interventions in individual cases or series. Year introduced: 1992  
30  
31  
32  
33  
34  
35  
36  
37  
38  
39  
40  
41  
42  
43  
44  
45  
46  
47  
48  
49  
50  
51  
52  
53  
54  
55  
56  
57  
58  
59  
60

PA-SCer systematic review narrative synthesis: first draft T&O and internal med 160806

SUPPLEMENTARY FILE 2: DEFINITIONS used in this review

As this review question contained broad terms, these were defined at the outset, as follows:

- Physician Associates: trained in a medical model to work in all settings and undertake physical examinations, investigations, diagnosis, treatment, and prescribe within their scope of practice as agreed with their supervising doctor.[1,2] Physician Associates are sometimes described within the term ‘mid-level providers’ in developed economies: ‘...the term mid-level practitioner means an individual practitioner, other than a physician, dentist, veterinarian, or podiatrist, who is licensed, registered, or otherwise permitted by the United States or the jurisdiction in which he/she practices, to dispense a controlled substance in the course of professional practice. Examples of mid-level practitioners include, but are not limited to, health-care providers such as nurse practitioners, nurse midwives, nurse anaesthetists, clinical nurse specialists and physician assistants who are authorized to dispense controlled substances by the state in which they practice.’ [3] While this term is contested as an appropriate umbrella term due to its hierarchical connotations [4,5] and international variation in usage,[6] it appears in the literature regarding Physician Associates.
- Impact: using the broad headings of the components of quality as suggested by Maxwell (1992),[7] augmenting that of Donabedian,[8] that is, effectiveness, efficiency, acceptability, access, equity and relevance; further consolidated in the aspects of quality set out in the NHS Next stage Review (2008)[9]: patient safety, patient experience and effectiveness of care.
- Specialties most frequently employing PAs in England:
  - acute medicine  
‘Acute medicine is the part of general (internal) medicine concerned with the immediate and early specialist management of adult patients who present to, or from within, hospitals as urgencies or emergencies’.[10]
  - care of the elderly  
‘...geriatric medicine is mainly concerned with people over the age of 75, although many ‘geriatric’ patients are much older. However, geriatric medicine in the UK is broadly from the age of 65 onwards. Frail older people are those with multiple diseases, that often includes dementia, with reduced functional reserve who tend to present to hospital with ‘geriatric syndromes’ such as falls, confusion and immobility.’[11]
  - emergency medicine  
‘Emergency medicine is a field of practice based on the knowledge and skills required for the prevention, diagnosis and management of acute and urgent aspects of illness and injury affecting patients of all age groups with a full spectrum of episodic undifferentiated physical and behavioural disorders; it further encompasses an understanding of the development of



PA-SCer systematic review narrative synthesis: first draft T&O and internal med 160806

1  
2  
3           prehospital and in hospital emergency medical systems and the skills necessary for this  
4           development.’ [12]

5  
6       – mental health /psychiatry

7           ‘Mental health problems can take many forms including depression, schizophrenia, eating  
8           disorders, anxieties, phobias, drug and alcohol abuse, post-traumatic stress disorder, and  
9           dementia.’[13] Psychiatry includes the sub specialties of child and adolescent, forensic,  
10           general adult, old age, psychotherapy and psychiatry of learning disabilities. [14]

11  
12  
13       - trauma and orthopaedics

14           Trauma and orthopaedics is an area of surgery concerned with injuries and conditions that  
15           affect the musculoskeletal system (the bones, joints, ligaments, tendons, muscles and  
16           nerves).[15]

17  
18  
19  
20  
21  
22  
23       References

- 24  
25  
26       1. Department of Health. The Competence and Curriculum Framework for the Physician Assistant.  
27           London: Department of Health 2006.
- 28       2. Physician Assistant Managed Voluntary Register The Revised Competence and Curriculum  
29           Framework for the Physician Assistant. 2012 Accessed at [http://www.ukapa.co.uk/files/CCF-27-](http://www.ukapa.co.uk/files/CCF-27-03-12-for-PAMVR.pdf)  
30           03-12-for-PAMVR.pdf.
- 31       3. United States Department of Justice. (n.d.). Mid-level practitioners authorization by state.  
32           Retrieved from <http://www.deadiversion.usdoj.gov/drugreg/practioners/index.html>
- 33       4. Bishop CS. Advanced Practitioners Are Not Mid-Level Providers. Vol 3 No 5 Sep/Oct 2012 287-  
34           8. J Adv Pract Oncol AdvancedPractitioner.com  
35           <http://www.advancedpractitioner.com/media/152572/287.pdf>
- 36       5. Pappas MD. Stop calling nurse practitioners mid-level providers. 2014 Kevin MD.com.  
37           <http://www.kevinmd.com/blog/2014/07/stop-calling-nurse-practitioners-mid-level-providers.html>.  
38           Accessed 24 November 2015.
- 39       6. Brown A, Cornetto G, Cumbi A, de Pinho H, Kamwendo F, Lehmann U et al. Mid-level health  
40           providers: a promising resource. Rev Peru Med Exp Salud Publica. 2011; 28(2): 308-15.
- 41       7. Maxwell R. Dimensions of quality revisited: from thought to action. Quality in Health Care  
42           1992;1:171-177.
- 43       8. Donabedian A. The quality of care. How can it be assessed? JAMA 1988;260:1743–8.  
44           <http://dx.doi.org/10.1001/jama.1988.03410120089033>
- 45  
46  
47  
48  
49  
50  
51  
52  
53  
54  
55  
56  
57  
58  
59  
60

PA-SCer systematic review narrative synthesis: first draft T&O and internal med 160806

- 1  
2  
3 9. Department of Health. High Quality Care For All NHS Next Stage Review Final Report. 2008.  
4 [https://www.gov.uk/government/uploads/system/uploads/attachment\\_data/file/228836/7432.pdf](https://www.gov.uk/government/uploads/system/uploads/attachment_data/file/228836/7432.pdf)  
5  
6 Accessed 10 December 2015.
- 7  
8 10. Royal College of Physicians. *Acute medical care; the right person, in the right setting—first time*.  
9 Report of a working party. London: RCP, 2007.
- 10  
11 11. Conroy S, Cooper N. Executive summary. British Geriatrics Society, 2012.  
12 <http://www.bgs.org.uk/index.php/topresources/publicationfind/goodpractice/44-gpgacutecare%20>  
13  
14 Accessed 24 Nov 2015.
- 15  
16 12. International Federation for Emergency Medicine. About IFEM IFEM Definition of Emergency  
17  
18 Medicine. 2008. [http://www.ifem.cc/About\\_IFEM.aspx](http://www.ifem.cc/About_IFEM.aspx) Accessed Nov 24 2015.
- 19  
20 13. Royal College of Psychiatrists. Glossary of Terms Professionals involved in the care of people  
21  
22 with mental health problems. 2015.  
23 <http://www.rcpsych.ac.uk/healthadvice/moreinformation/definitions/professionalsinpsychiatry.aspx>  
24  
25 [x. Accessed 10 December](http://www.rcpsych.ac.uk/healthadvice/moreinformation/definitions/professionalsinpsychiatry.aspx) 2015.
- 26  
27 14. Royal College of Psychiatrists. A Career in Psychiatry. 2015.  
28 <http://www.rcpsych.ac.uk/discoverpsychiatry/acareerinpsychiatry.aspx> Accessed 10 December  
29  
30 2015.
- 31  
32 15. NHS Choices. Trauma and Orthopaedics (Orthopaedic Surgery) 2015.  
33  
34 <http://www.nhs.uk/Conditions/orthopaedics/Pages/Introduction.aspx>  
35  
36  
37  
38  
39  
40  
41  
42  
43  
44  
45  
46  
47  
48  
49  
50  
51  
52  
53  
54  
55  
56  
57  
58  
59  
60

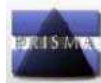

# PRISMA 2009 Checklist

| Section/topic                      | #  | Checklist item                                                                                                                                                                                                                                                                                              | Reported on page # |
|------------------------------------|----|-------------------------------------------------------------------------------------------------------------------------------------------------------------------------------------------------------------------------------------------------------------------------------------------------------------|--------------------|
| <b>TITLE</b>                       |    |                                                                                                                                                                                                                                                                                                             |                    |
| Title                              | 1  | Identify the report as a systematic review, meta-analysis, or both.                                                                                                                                                                                                                                         | 1                  |
| <b>ABSTRACT</b>                    |    |                                                                                                                                                                                                                                                                                                             |                    |
| Structured summary                 | 2  | Provide a structured summary including, as applicable: background; objectives; data sources; study eligibility criteria, participants, and interventions; study appraisal and synthesis methods; results; limitations; conclusions and implications of key findings; systematic review registration number. | 4                  |
| <b>INTRODUCTION</b>                |    |                                                                                                                                                                                                                                                                                                             |                    |
| Rationale                          | 3  | Describe the rationale for the review in the context of what is already known.                                                                                                                                                                                                                              | 6-7                |
| Objectives                         | 4  | Provide an explicit statement of questions being addressed with reference to participants, interventions, comparisons, outcomes, and study design (PICOS).                                                                                                                                                  | 9                  |
| <b>METHODS</b>                     |    |                                                                                                                                                                                                                                                                                                             |                    |
| Protocol and registration          | 5  | Indicate if a review protocol exists, if and where it can be accessed (e.g., Web address), and, if available, provide registration information including registration number.                                                                                                                               | 8                  |
| Eligibility criteria               | 6  | Specify study characteristics (e.g., PICOS, length of follow-up) and report characteristics (e.g., years considered, language, publication status) used as criteria for eligibility, giving rationale.                                                                                                      | 8                  |
| Information sources                | 7  | Describe all information sources (e.g., databases with dates of coverage, contact with study authors to identify additional studies) in the search and date last searched.                                                                                                                                  | 8                  |
| Search                             | 8  | Present full electronic search strategy for at least one database, including any limits used, such that it could be repeated.                                                                                                                                                                               | Supplementary file |
| Study selection                    | 9  | State the process for selecting studies (i.e., screening, eligibility, included in systematic review, and, if applicable, included in the meta-analysis).                                                                                                                                                   | 8-9                |
| Data collection process            | 10 | Describe method of data extraction from reports (e.g., piloted forms, independently, in duplicate) and any processes for obtaining and confirming data from investigators.                                                                                                                                  | 10                 |
| Data items                         | 11 | List and define all variables for which data were sought (e.g., PICOS, funding sources) and any assumptions and simplifications made.                                                                                                                                                                       | 10                 |
| Risk of bias in individual studies | 12 | Describe methods used for assessing risk of bias of individual studies (including specification of whether this was done at the study or outcome level), and how this information is to be used in any data synthesis.                                                                                      | 10                 |
| Summary measures                   | 13 | State the principal summary measures (e.g., risk ratio, difference in means).                                                                                                                                                                                                                               | 10-11              |
| Synthesis of results               | 14 | Describe the methods of handling data and combining results of studies, if done, including measures of consistency (e.g., $I^2$ for each meta-analysis).                                                                                                                                                    | 10-11              |

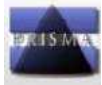

# PRISMA 2009 Checklist

Page 1 of 2

| Section/topic                 | #  | Checklist item                                                                                                                                                                                           | Reported on page #        |
|-------------------------------|----|----------------------------------------------------------------------------------------------------------------------------------------------------------------------------------------------------------|---------------------------|
| Risk of bias across studies   | 15 | Specify any assessment of risk of bias that may affect the cumulative evidence (e.g., publication bias, selective reporting within studies).                                                             |                           |
| Additional analyses           | 16 | Describe methods of additional analyses (e.g., sensitivity or subgroup analyses, meta-regression), if done, indicating which were pre-specified.                                                         |                           |
| <b>RESULTS</b>                |    |                                                                                                                                                                                                          |                           |
| Study selection               | 17 | Give numbers of studies screened, assessed for eligibility, and included in the review, with reasons for exclusions at each stage, ideally with a flow diagram.                                          | 11+figure1                |
| Study characteristics         | 18 | For each study, present characteristics for which data were extracted (e.g., study size, PICOS, follow-up period) and provide the citations.                                                             | Table 1                   |
| Risk of bias within studies   | 19 | Present data on risk of bias of each study and, if available, any outcome level assessment (see item 12).                                                                                                | Table 2 + Figure2         |
| Results of individual studies | 20 | For all outcomes considered (benefits or harms), present, for each study: (a) simple summary data for each intervention group (b) effect estimates and confidence intervals, ideally with a forest plot. | Table 1 + 2 + pages 24-30 |
| Synthesis of results          | 21 | Present results of each meta-analysis done, including confidence intervals and measures of consistency.                                                                                                  | n/a                       |
| Risk of bias across studies   | 22 | Present results of any assessment of risk of bias across studies (see Item 15).                                                                                                                          | 24                        |
| Additional analysis           | 23 | Give results of additional analyses, if done (e.g., sensitivity or subgroup analyses, meta-regression [see Item 16]).                                                                                    | n/a                       |
| <b>DISCUSSION</b>             |    |                                                                                                                                                                                                          |                           |
| Summary of evidence           | 24 | Summarize the main findings including the strength of evidence for each main outcome; consider their relevance to key groups (e.g., healthcare providers, users, and policy makers).                     | 30-31                     |
| Limitations                   | 25 | Discuss limitations at study and outcome level (e.g., risk of bias), and at review-level (e.g., incomplete retrieval of identified research, reporting bias).                                            | 32-33                     |
| Conclusions                   | 26 | Provide a general interpretation of the results in the context of other evidence, and implications for future research.                                                                                  | 33-34                     |
| <b>FUNDING</b>                |    |                                                                                                                                                                                                          |                           |
| Funding                       | 27 | Describe sources of funding for the systematic review and other support (e.g., supply of data); role of funders for the systematic review.                                                               | 36                        |

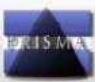

# PRISMA 2009 Checklist

- 1
- 2
- 3
- 4
- 5
- 6
- 7
- 8
- 9
- 10
- 11
- 12
- 13
- 14
- 15
- 16
- 17
- 18
- 19
- 20
- 21
- 22
- 23
- 24
- 25
- 26
- 27
- 28
- 29
- 30
- 31
- 32
- 33
- 34
- 35
- 36
- 37
- 38
- 39
- 40
- 41
- 42
- 43
- 44
- 45
- 46
- 47

For more information, visit: [www.prisma-statement.org](http://www.prisma-statement.org).

Page 2 of 2

For peer review only

# BMJ Open

## The contribution of physician assistants/associates to secondary care: a systematic review

|                                 |                                                                                                                                                                                                                                                                                                                                                                                                                                                                                                                                                                                                                                                                                                                                                                                                                                                                                                                                                                                                                                                                                |
|---------------------------------|--------------------------------------------------------------------------------------------------------------------------------------------------------------------------------------------------------------------------------------------------------------------------------------------------------------------------------------------------------------------------------------------------------------------------------------------------------------------------------------------------------------------------------------------------------------------------------------------------------------------------------------------------------------------------------------------------------------------------------------------------------------------------------------------------------------------------------------------------------------------------------------------------------------------------------------------------------------------------------------------------------------------------------------------------------------------------------|
| Journal:                        | <i>BMJ Open</i>                                                                                                                                                                                                                                                                                                                                                                                                                                                                                                                                                                                                                                                                                                                                                                                                                                                                                                                                                                                                                                                                |
| Manuscript ID                   | bmjopen-2017-019573.R1                                                                                                                                                                                                                                                                                                                                                                                                                                                                                                                                                                                                                                                                                                                                                                                                                                                                                                                                                                                                                                                         |
| Article Type:                   | Research                                                                                                                                                                                                                                                                                                                                                                                                                                                                                                                                                                                                                                                                                                                                                                                                                                                                                                                                                                                                                                                                       |
| Date Submitted by the Author:   | 08-Feb-2018                                                                                                                                                                                                                                                                                                                                                                                                                                                                                                                                                                                                                                                                                                                                                                                                                                                                                                                                                                                                                                                                    |
| Complete List of Authors:       | Halter, Mary; St Georges University Hospital, Faculty of Health and Social Care Sciences<br>Wheeler, Carly; Kingston University Faculty of Health Social Care and Education, Centre for Health and Social Care Research<br>Pelone, Ferruccio; Royal College of Obstetricians and Gynaecologists, National Guidelines Alliance<br>Gage, Heather; University of Surrey, School of Economics<br>de Lusignan, Simon; University of Surrey, Department of Health Care Management and Policy; St. Georges University of London, Division of Population Health Sciences and Education<br>Parle, Jim; University of Birmingham, Institute of Clinical Sciences<br>Grant, Robert; Kingston University Faculty of Health Social Care and Education, Centre for Health and Social Care Research<br>Gabe, Jonathan; Royal Holloway, University of London, Criminology and Sociology<br>Nice, Laura; University of Birmingham, Institute of Clinical Sciences<br>Drennan, Vari; Kingston University Faculty of Health Social Care and Education, Centre for Health and Social Care Research |
| <b>Primary Subject Heading</b>: | Health services research                                                                                                                                                                                                                                                                                                                                                                                                                                                                                                                                                                                                                                                                                                                                                                                                                                                                                                                                                                                                                                                       |
| Secondary Subject Heading:      | Emergency medicine, Geriatric medicine, Mental health, Surgery                                                                                                                                                                                                                                                                                                                                                                                                                                                                                                                                                                                                                                                                                                                                                                                                                                                                                                                                                                                                                 |
| Keywords:                       | GENERAL MEDICINE (see Internal Medicine), Quality in health care < HEALTH SERVICES ADMINISTRATION & MANAGEMENT, ORTHOPAEDIC & TRAUMA SURGERY, Physician Assistant                                                                                                                                                                                                                                                                                                                                                                                                                                                                                                                                                                                                                                                                                                                                                                                                                                                                                                              |
|                                 |                                                                                                                                                                                                                                                                                                                                                                                                                                                                                                                                                                                                                                                                                                                                                                                                                                                                                                                                                                                                                                                                                |

SCHOLARONE™  
Manuscripts

1

2 **The contribution of physician assistants/associates to secondary care: a systematic**  
3 **review**

4  
5 **Authors**

6 *Corresponding author*

7 Halter M, PhD

8 Faculty of Health, Social Care and Education

9 Kingston University and St George's, University of London

10 Cranmer Terrace

11 London SW17 0RE

12 00 44 (0)20 8725 0337

13 [m.halter@sgul.kingston.ac.uk](mailto:m.halter@sgul.kingston.ac.uk)

14 ORCID: 0000-0001-6636-0621

15

16 Wheeler C, PhD

17 Faculty of Health, Social Care and Education, Kingston University and St George's,

18 University of London, London UK

1  
2  
3 19  
4  
5

6 20 Pelone F, PhD  
7

8  
9 21 National Guideline Alliance, Royal College of Obstetricians and Gynaecologists, London UK  
10

11  
12 22  
13

14  
15 23 Gage H, PhD  
16

17  
18 24 School of Economics, University of Surrey, Guildford, UK  
19

20  
21 25  
22

23  
24 26 de Lusignan S, MD, FRCGP  
25

26  
27 27 Department of Clinical and Experimental Medicine, University of Surrey, Guildford, UK  
28

29  
30 28  
31

32  
33 29 Parle J, MD, FRCGP  
34

35  
36 30 Institute of Clinical Sciences, University of Birmingham, Birmingham, UK  
37

38  
39 31  
40

41  
42 32 Grant R, MSc  
43

44  
45 33 Faculty of Health, Social Care and Education, Kingston University and St George's,  
46

47  
48 34 University of London, London UK  
49

50  
51 35  
52

53  
54 36 Gabe J, PhD  
55  
56  
57  
58



1  
2  
3  
4  
5  
6  
7  
8  
9  
10  
11  
12  
13  
14  
15  
16  
17  
18  
19  
20  
21  
22  
23  
24  
25  
26  
27  
28  
29  
30  
31  
32  
33  
34  
35  
36  
37  
38  
39  
40  
41  
42  
43  
44  
45  
46  
47  
48  
49  
50  
51  
52  
53  
54  
55  
56  
57  
58  
59  
60

37 Centre for Criminology & Sociology, School of Law, Royal Holloway, University of  
38 London, Egham, UK

40 Nice L, PhD  
41 Institute of Clinical Sciences, University of Birmingham, Birmingham, UK

42 Drennan VM, PhD  
43 Faculty of Health, Social Care and Education, Kingston University and St George's,  
44 University of London, London UK

46 **Word count:** 5832 excluding tables

For peer review only

1  
2  
3 48 **ABSTRACT**  
4  
5

6 49 **Objective:** to appraise and synthesise research on the impact of physician  
7  
8 50 assistants/associates in secondary care, specifically acute internal medicine, care of the  
9  
10 51 elderly, emergency medicine, trauma and orthopaedics, and mental health.  
11  
12

13 52 **Design** Systematic review  
14  
15

16 53 **Setting:** Electronic databases (Medline, Embase, ASSIA, CINAHL, SCOPUS, PsycINFO,  
17  
18 54 Social Policy and Practice, EconLit and Cochrane database), reference lists and related  
19  
20 55 articles.  
21  
22

23 56 **Included articles:** Peer reviewed articles of any study design, published in English, 1995 to  
24  
25 57 2017.  
26  
27

28 58 **Interventions:** Blinded parallel processes were used to screen abstracts and full text, data  
29  
30 59 extractions and quality assessments against published guidelines. A narrative synthesis was  
31  
32 60 undertaken.  
33  
34

35 61 **Outcome measures:** Impact on: patients' experience and outcomes, service organisation,  
36  
37 62 working practices, other professional groups and costs.  
38  
39

40 63 **Results:** 5472 references were identified and 161 read in full; 16 were included - emergency  
41  
42 64 medicine (seven), trauma and orthopaedics (six), acute internal medicine (two), mental health  
43  
44 65 (one) and care of the elderly (none). All studies were observational, with variable  
45  
46 66 methodological quality.  
47  
48

49 67 In emergency medicine and in trauma and orthopaedics, when PAs are added to teams,  
50  
51 68 reduced waiting and process times, lower charges, equivalent readmission rate and good  
52  
53 69 acceptability to staff and patients are reported. Analgesia prescribing, operative complications  
54  
55  
56  
57  
58

1  
2  
3 70 and mortality outcomes were variable. In internal medicine outcomes of care provided by  
4  
5 71 PAs and doctors were equivalent.  
6  
7

8 72 **Conclusions:** PAs have been deployed to increase the capacity of a team, enabling gains in  
9  
10 73 waiting time, throughput, continuity and medical cover. When PAs were compared to  
11  
12 74 medical staff, reassuringly there was little or no negative effect on health outcomes or cost.  
13  
14 75 The difficulty of attributing cause and effect in complex systems where work is organised in  
15  
16 76 teams is highlighted. Further rigorous evaluation is required to address the complexity of the  
17  
18 77 PA role, reporting on more than one setting, and including comparison between PAs and  
19  
20 78 roles for which they are substituting.  
21  
22  
23  
24  
25

## 26 80 ARTICLE SUMMARY

### 27 81 **STRENGTHS AND LIMITATIONS OF THIS STUDY**

- 28  
29  
30  
31  
32 82 • This study's strengths lie in systematically analysing the empirical evidence for the  
33  
34 83 contribution of physician associates to secondary care, following international  
35  
36 84 guidelines.  
37  
38 85 • Focusing on specialties in which physician associates are increasingly deployed in the  
39  
40 86 UK, while aiming for international applicability. This methodological approach  
41  
42 87 carries limitations in excluding closely related and sometimes high quality studies that  
43  
44 88 did not meet our strict inclusion criteria, but that are relevant to understanding the  
45  
46 89 impact of PAs in secondary care settings.  
47  
48 90 • The review was strengthened by using established guidelines to carry out quality  
49  
50 91 assessment of the included studies. Although our approach can be considered  
51  
52  
53  
54  
55  
56  
57  
58  
59  
60

1  
2  
3 92 reductionist, it provides decision makers with consistent information about the quality  
4  
5 93 of the evidence against which to weight the value of individual findings.  
6  
7  
8 94

9  
10  
11  
12  
13  
14  
15  
16  
17  
18  
19  
20  
21  
22  
23  
24  
25  
26  
27  
28  
29  
30  
31  
32  
33  
34  
35  
36  
37  
38  
39  
40  
41  
42  
43  
44  
45  
46  
47  
48  
49  
50  
51  
52  
53  
54  
55  
56  
57  
58  
59  
60

For peer review only

1  
2  
3 95 THE CONTRIBUTION OF PHYSICIAN ASSISTANTS/ASSOCIATES TO SECONDARY  
4  
5 96 CARE: A SYSTEMATIC REVIEW  
6  
7  
8 97  
9  
10  
11

12 98 **Introduction**  
13  
14

15 99 Health care systems internationally face substantial medical workforce challenges. [1] An  
16  
17 100 approach used in many countries has been to develop advanced clinical practitioner roles  
18  
19 101 (also sometimes known as mid-level non-physician clinicians), who undertake some of the  
20  
21 102 activities of doctors. [2] One of these roles is the physician assistant/associate (PA). The PA  
22  
23 103 role was first developed, by physicians, in the 1960s in the United States (US) in response to  
24  
25 104 medical shortages in certain specialties and regions.[3] As of the end of 2016, there were  
26  
27 105 115,547 nationally certified and state-licensed PAs in the US,[4] following 44% growth since  
28  
29 106 2010. In the US PAs practice as medical professionals in healthcare teams with physicians  
30  
31 107 and other providers in all 50 states.[5] Over the last two decades other countries have been  
32  
33 108 introducing PAs into their health workforce, including Australia, Canada, Germany, Ghana,  
34  
35 109 India, Kenya, the Netherlands, Saudi Arabia, South Africa, Taiwan, and the UK,[6] where  
36  
37 110 they are known as physicians associates. Some countries, including the UK, have national or  
38  
39 111 federal policy commitments to develop PA education programmes and significantly increase  
40  
41 112 their availability,[7,8] while others are determining the value of such roles through  
42  
43 113 demonstration projects.[9] The role has received increasing attention as a potential growth  
44  
45 114 area from the UK government, particularly in primary care[10] where there is evidence that  
46  
47 115 physician associates can be complementary to general practitioner and nursing roles, albeit  
48  
49 116 with limitations due to not currently having prescribing rights.[11] However, in the USA  
50  
51 117 only 21% of physician assistants work in family medicine/general practice;[4] similarly in the  
52  
53 118 UK and the Netherlands they report working in a range of secondary care specialties.[12,13]  
54  
55  
56  
57  
58

1  
2  
3 119 Like many aspects of workforce innovation and change, there is very limited published  
4  
5 120 evidence as to the contribution and impact PAs have within this setting. Existing systematic  
6  
7 121 reviews of the contribution PAs make to health care have considered evidence from primary  
8  
9 122 and secondary care together [14] just primary care, [15] rural healthcare and emergency  
10  
11 123 department [16] or considered PAs and nurse practitioners together in surgical services.[17].

12  
13 124 Given the recent trends to utilise PAs internationally in secondary care, our purpose in  
14  
15 125 conducting this new review was to systematically summarise the current evidence in  
16  
17 126 secondary care.

18  
19  
20  
21 127 The objective of the review was to appraise and synthesise the published literature on the  
22  
23 128 impact of physician associates on patient experience and outcomes, service organisation,  
24  
25 129 working practices, other professional groups and cost. The review was bounded by  
26  
27 130 consideration of the secondary care specialties in which PAs were most frequently reported to  
28  
29 131 be employed in the UK. Using the annual UK Association of Physician Associates Census  
30  
31 132 (conducted in 2016 with 150 PA respondents),[18] four specialties with relatively larger  
32  
33 133 numbers of PAs replying to the survey were clearly identifiable: acute internal medicine  
34  
35 134 (n=23), emergency medicine (n=23), care of the elderly (n=12) and trauma and orthopaedics  
36  
37 135 (n=10). While three other specialties (cardiology, neurology and general surgery) reported  
38  
39 136 five PAs in each, we selected mental health as our fifth specialty to explore, with four PAs  
40  
41 137 reported,[18] to provide a contrast to the focus on physical health in the other four specialties  
42  
43 138 selected. The concentration of PAs in these clinical areas is consistent with evidence from  
44  
45 139 other European countries developing a PA workforce.[19] The review is intended to inform  
46  
47 140 clinicians and managers considering innovation and change in their secondary care  
48  
49 141 workforce.

50  
51  
52  
53 142

## 143 **METHODS**

144

### 145 **Search strategy**

146 This systematic review was designed and reported to meet international guidelines: the  
147 Preferred Reporting Items for Systematic Reviews and Meta-Analyses (PRISMA).[20] Full  
148 details of the overall search strategy can be found in the research protocol, registered with the  
149 International Prospective Register of Systematic Reviews (PROSPERO),  
150 CRD42016032895.[21]  
151 Studies addressing the research question were identified by systematic searching for  
152 keywords in the following electronic databases: Medline (Ovid), Embase (Ovid), Applied  
153 Social Sciences Index and Abstracts (ASSIA), Cumulative Index to Nursing and Allied  
154 Health Literature (CINAHL) Plus (EBSCO), SCOPUS –V.4 (Elsevier), PsycINFO, Social  
155 Policy and Practice (Ovid), EconLit (EBSCO), and Cochrane Central Register of Controlled  
156 Trials (CENTRAL) from the beginning of January 1995 to the beginning of January 2018.  
157 The search strategy was performed on the 14<sup>th</sup> December 2015 and updated on 5<sup>th</sup> January  
158 2018.. No language or publication status restrictions were imposed at the electronic search  
159 strategy stage. We present the Medline search strategy, and the definitions of the MeSH terms  
160 employed, in Supplementary file 1.

161 In addition, we used ‘lateral searching’ techniques[22] including checking reference lists of  
162 systematic reviews identified at the abstract screening stage and papers selected for inclusion  
163 after full text reading; using the ‘Cited by’ option on Scopus, and the ‘Related articles’ option  
164 on PubMed, and tracking citations.

165

### 166 **Inclusion criteria and study selection**

1  
2  
3 167 Relevant studies were selected according to eligibility criteria using a two-step screening  
4  
5 168 process: 1) title and abstract screening; and 2) full-text screening. First, two authors (CW and  
6  
7 169 FP) in parallel sifted titles and abstracts of all the articles resulting from the searches to  
8  
9 170 ascertain their potential relevance, with disagreements resolved by a third author (MH or  
10  
11 171 VMD). All the full-texts of the potentially relevant citations were further examined in parallel  
12  
13 172 by two authors (pairings amongst CW, FP, or MH) to analyse whether they met all the  
14  
15 173 inclusion criteria. Disagreements were resolved by peer discussion and a third view from the  
16  
17 174 project lead (VMD) if required.

18  
19  
20 175 Peer-reviewed articles were considered for analysis if they fitted the following inclusion  
21  
22 176 criteria:

- 23  
24 177 • Population: Physician Associates (PAs) according to the UK definition [23]
- 25  
26 178 • Intervention: The implementation of PAs in the following secondary health care  
27  
28 179 specialties: acute medicine, care of the elderly, emergency medicine, mental health, and  
29  
30 180 trauma and orthopaedics (see supplementary file 2 for the definitions used).
- 31  
32 181 • Comparison: The comparison group was any health care professional to whom PAs were  
33  
34 182 compared.
- 35  
36 183 • Outcome: Any measure of impact, informed by recognised dimensions of quality -  
37  
38 184 effectiveness, efficiency, acceptability, access, equity and relevance.[24]
- 39  
40 185 • Study design: Any study design that allowed measurement of impact of PAs in secondary  
41  
42 186 care utilising a primary study.

43  
44  
45  
46 187

#### 47 48 188 **Screening exclusion criteria**

49  
50 189 Articles were excluded if they did not fulfil one or more inclusion criteria or if they: 1) were  
51  
52 190 not published in the English language, 2) reported on PAs working in countries that are not  
53  
54 191 defined by the International Monetary Fund as advanced economies;[25] 3) did not report



1  
2  
3 192 empirical findings or were published only in abstract form; 4) presented their results for PAs  
4  
5 193 in an amalgamated form with the results for other professions/mid-level providers or did not  
6  
7 194 describe the specialties they were reporting on; 5) contained only descriptive accounts of PA  
8  
9 195 demography, workload, clinical practice or productivity or PA self-report of any aspect of  
10  
11 196 their role; 6) focused on and measured an intervention delivered by PAs rather than PAs as  
12  
13 197 the intervention; 7) focused on and measured PA clinical practice or productivity before and  
14  
15 198 after a service redesign or educational intervention; 8) focused solely on educational  
16  
17 199 processes; and 9) presented literature reviews, commentaries, and/or non-peer-reviewed  
18  
19  
20 200 articles.  
21

22 201

## 23 24 202 **Data collection and quality assessment**

25  
26 203 Two authors (pairings amongst FP, CW and MH) independently extracted the data from  
27  
28 204 selected papers, with any disagreement resolved through discussion. A checklist was used to  
29  
30 205 extract the following information from the selected papers: 1) general characteristics of  
31  
32 206 studies and 2) results, limitations and conclusions as noted by authors and reviewers.  
33  
34 207 The same author pairings appraised the quality of included studies using the QualSyst quality  
35  
36 208 checklists for quantitative and qualitative studies, selected as a validated tool for the  
37  
38 209 evaluation of primary research papers from a variety of fields,[26] with additional questions  
39  
40 210 from the Mixed Methods Appraisal Tool, selected as a tool tested for its efficiency and  
41  
42 211 reliability,[27] where appropriate. For the quantitative studies, 12 items (Figure 1) were  
43  
44 212 scored depending on the degree to which the specific criteria were met (“yes” = 2, “partial” =  
45  
46 213 1, “no” = 0). Scores for the qualitative studies were calculated in a similar fashion, based on  
47  
48 214 the scoring of ten items. Any items not applicable to a particular study design were marked  
49  
50 215 “n/a” and were excluded from the calculation of the summary score. No study was excluded  
51  
52 216 on the basis of its quality score; the limitations of lower quality evidence are however  
53  
54  
55  
56  
57  
58  
59

1  
2  
3 217 explored in considering how much weight can be given to the evidence when we synthesise  
4  
5 218 studies. [28]

6  
7 219

## 8 9 220 **Data analysis**

10  
11 221 A meta-analysis was not performed due to the heterogeneity of the included studies in terms  
12  
13 222 of scope and outcomes investigated as found during data extraction. Therefore, narrative  
14  
15 223 synthesis was undertaken [29] conducted against the four elements in published, accepted  
16  
17 224 guidance on the conduct of narrative synthesis in systematic reviews [30,31]: developing a  
18  
19 225 theory of how the intervention works, why and for whom; developing a preliminary synthesis  
20  
21 226 of findings of included studies; exploring relationships within and between studies; assessing  
22  
23 227 the robustness of the synthesis (through formal quality assessment as well as reflection). For  
24  
25 228 the synthesis the included studies were grouped into specialty (that is, acute medicine, care of  
26  
27 229 the elderly, emergency medicine, mental health and trauma and orthopaedics) and then sub-  
28  
29 230 grouped into the outcomes they measured.

30  
31  
32  
33 231

## 34 35 232 **RESULTS**

36  
37 233

### 38 39 40 234 **Search results**

41  
42 235 The overall search strategy identified 5,472 references, from which we selected 161 articles  
43  
44 236 for more detailed reading. Figure 2 presents the PRISMA flowchart, illustrating the literature  
45  
46 237 search and selection process, and reasons for study exclusion on full text reading. A total of  
47  
48 238 16 articles were included for data collection, quality appraisal and data analysis.

49  
50 239 A summary of the included evidence is presented below in three subsections: characteristics  
51  
52 240 of included studies, methodological quality, and synthesis of findings on the impact of PAs.

53  
54  
55 241

1  
2  
3  
4  
5  
6  
7  
8  
9  
10  
11  
12  
13  
14  
15  
16  
17  
18  
19  
20  
21  
22  
23  
24  
25  
26  
27  
28  
29  
30  
31  
32  
33  
34  
35  
36  
37  
38  
39  
40  
41  
42  
43  
44  
45  
46  
47  
48  
49  
50  
51  
52  
53  
54  
55  
56  
57  
58  
59  
60

242 **Characteristics of included studies**

243 Table 1 presents the characteristics for each study in terms of the specialties they were drawn  
244 from.

For peer review only

245 **Table 1: Characteristics of studies included in full – studies presenting comparisons of PAS with other health care professionals**

246

| Specialty          | Aim(s)                                                                                                     | Study Setting                                                                                            | Intervention                                                                                                                    | Comparison                                                                                                                                 | Participants                                                                                                  | Study design              | Outcome measures                                                                            | First author and year |
|--------------------|------------------------------------------------------------------------------------------------------------|----------------------------------------------------------------------------------------------------------|---------------------------------------------------------------------------------------------------------------------------------|--------------------------------------------------------------------------------------------------------------------------------------------|---------------------------------------------------------------------------------------------------------------|---------------------------|---------------------------------------------------------------------------------------------|-----------------------|
| Emergency medicine | To determine whether PAs are an appropriate option for providing services rendered by physicians in the ED | USA<br>Walk in urgent care facility (satellite of an inner-city teaching hospital level 1 trauma centre) | PAs (n=5) rotate through the ED. PAs work solo from 08.00-12.00. No written diagnostic or therapeutic guidelines were followed. | 25 physicians rotate through the ED. Physicians work solo from 17.00-21.00. No written diagnostic or therapeutic guidelines were followed. | n= 5345 (seen by PAs)<br>n = 4256 (seen by physicians) during times of single coverage<br>June 1995-June 1996 | Comparative retrospective | <ul style="list-style-type: none"> <li>• Length of visit</li> <li>• Total charge</li> </ul> | Arnopolin 2000[32]    |

1  
2  
3  
4  
5  
6  
7  
8  
9  
10  
11  
12  
13  
14  
15  
16  
17  
18  
19  
20  
21  
22  
23  
24  
25  
26  
27  
28  
29  
30  
31  
32  
33  
34  
35  
36  
37  
38  
39  
40  
41  
42  
43  
44  
45  
46  
47

|                    |                                                             |                                                                         |                                                                                                                                                                                                                            |                    |                                                                                                                                                                                 |                           |                                                                                                                                                                    |                   |
|--------------------|-------------------------------------------------------------|-------------------------------------------------------------------------|----------------------------------------------------------------------------------------------------------------------------------------------------------------------------------------------------------------------------|--------------------|---------------------------------------------------------------------------------------------------------------------------------------------------------------------------------|---------------------------|--------------------------------------------------------------------------------------------------------------------------------------------------------------------|-------------------|
| Emergency medicine | To examine the impact of PAs and nurse practitioners in EDs | Canada<br>Six community hospitals with ED volumes between 23 and 66,000 | PAs were introduced as an unregulated provider without medical directives and worked under the supervision of a registered physician who was responsible for all patient care on predetermined busiest periods for each ED | Baseline two weeks | All ED patients: Baseline n=9,585; two week period six months post implementation June 2007 n=10,007, of which PAs were on duty for 1,076 visits and directly involved in n=376 | Descriptive retrospective | <ul style="list-style-type: none"> <li>• Leaving without being seen</li> <li>• Wait time (triage to initial assessment)</li> <li>• Length of stay in ED</li> </ul> | Ducharme 2009[33] |
|--------------------|-------------------------------------------------------------|-------------------------------------------------------------------------|----------------------------------------------------------------------------------------------------------------------------------------------------------------------------------------------------------------------------|--------------------|---------------------------------------------------------------------------------------------------------------------------------------------------------------------------------|---------------------------|--------------------------------------------------------------------------------------------------------------------------------------------------------------------|-------------------|

1  
2  
3  
4  
5  
6  
7  
8  
9  
10  
11  
12  
13  
14  
15  
16  
17  
18  
19  
20  
21  
22  
23  
24  
25  
26  
27  
28  
29  
30  
31  
32  
33  
34  
35  
36  
37  
38  
39  
40  
41  
42  
43  
44  
45  
46  
47

|                    |                                                                                                                                                                                                |                                                                                                                                                                                      |                                                                                                                        |                                    |                                                                              |              |                                                                                                                                                                                                                                                                                                                                               |                 |
|--------------------|------------------------------------------------------------------------------------------------------------------------------------------------------------------------------------------------|--------------------------------------------------------------------------------------------------------------------------------------------------------------------------------------|------------------------------------------------------------------------------------------------------------------------|------------------------------------|------------------------------------------------------------------------------|--------------|-----------------------------------------------------------------------------------------------------------------------------------------------------------------------------------------------------------------------------------------------------------------------------------------------------------------------------------------------|-----------------|
| Emergency medicine | To understand trends in emergency medicine and interprofessional roles in delivering this care [...] The focus was on how doctors, PAs and nurse practitioners share emergency medicine visits | USA<br>National sample of non-institutional general and short-stay hospitals in the 50 States and the District of Columbia from the National Hospital Ambulatory Medical Care Survey | PAs as providers of ED care and prescribers of medication in emergency medicine (7.9% of patients seen by PAs in 2004) | Physicians and Nurse Practitioners | Random sample of patient visits to hospital EDs (n=1,034,758,313), 1995-2004 | Longitudinal | <ul style="list-style-type: none"> <li>• Proportion of visits in which medications are prescribed</li> <li>• Mean number of prescriptions written per visit</li> <li>• Non-narcotic analgesics prescriptions</li> <li>• Narcotic analgesics/NSAID S prescription by type of provider</li> <li>• Patient contact growth by provider</li> </ul> | Hooker 2008[34] |
|--------------------|------------------------------------------------------------------------------------------------------------------------------------------------------------------------------------------------|--------------------------------------------------------------------------------------------------------------------------------------------------------------------------------------|------------------------------------------------------------------------------------------------------------------------|------------------------------------|------------------------------------------------------------------------------|--------------|-----------------------------------------------------------------------------------------------------------------------------------------------------------------------------------------------------------------------------------------------------------------------------------------------------------------------------------------------|-----------------|

For peer review only

1  
2  
3  
4  
5  
6  
7  
8  
9  
10  
11  
12  
13  
14  
15  
16  
17  
18  
19  
20  
21  
22  
23  
24  
25  
26  
27  
28  
29  
30  
31  
32  
33  
34  
35  
36  
37  
38  
39  
40  
41  
42  
43  
44  
45  
46  
47

|                    |                                                                                                                                                             |                                                                                                         |                                                                                                                                                                               |                                    |                                                                                                                                                                                                                                         |                           |                              |                    |
|--------------------|-------------------------------------------------------------------------------------------------------------------------------------------------------------|---------------------------------------------------------------------------------------------------------|-------------------------------------------------------------------------------------------------------------------------------------------------------------------------------|------------------------------------|-----------------------------------------------------------------------------------------------------------------------------------------------------------------------------------------------------------------------------------------|---------------------------|------------------------------|--------------------|
| Emergency medicine | To compare the analgesic practices of emergency physicians with that of PAs                                                                                 | USA<br>ED within a suburban teaching hospital in Michigan with 90,000 annual visits                     | PAs were deployed for seeing patients presenting at the ED with isolated lower extremity trauma. PAs work closely with emergency physicians in the Prompt Care Area of the ED | Emergency physicians               | n=384 survey respondents of patients of all ages who presented at the ED with an isolated lower extremity injury evaluated with a foot or ankle radiograph, n=227 PA patients, n=153 emergency physician patients in a nine week period | Prospective cohort        | • Analgesia prescribing      | Kozlowski 2002[35] |
| Emergency medicine | To evaluate PAs' management of paediatric patients in a general ED through examination of the 72-hour recidivism rates of their younger paediatric patients | USA<br>General urban ED treating approximately 58000 patients annually, 20% of which are under 18 years | PAs evaluate, treat and discharge patients of any age independent of emergency physicians and PAs treating patients with consult from the emergency physician                 | Attending emergency physician only | n=2798 PA only cases; n=984 PA with emergency physician; n=6587 emergency physician only                                                                                                                                                | Comparative retrospective | • 72-hour revisits to the ED | Pavlick 2017[36]   |

|                    |                                                                                                                                                                          |                                                                                             |                                                                                       |                                                                                                         |                                                                                                                                                                                                                                                                                                      |                      |                                                                      |                  |
|--------------------|--------------------------------------------------------------------------------------------------------------------------------------------------------------------------|---------------------------------------------------------------------------------------------|---------------------------------------------------------------------------------------|---------------------------------------------------------------------------------------------------------|------------------------------------------------------------------------------------------------------------------------------------------------------------------------------------------------------------------------------------------------------------------------------------------------------|----------------------|----------------------------------------------------------------------|------------------|
| Emergency medicine | To compare the quality of ED pain management before and after implementation of the Joint Commission on the Accreditation of Healthcare Organizations' standards in 2001 | USA<br>National sample EDs included in the National Hospital Ambulatory Medical Care Survey | The use of PAs in the care of patients presenting to the ED with a long bone fracture | Patients presenting to the ED with a long bone fracture not seen by PAs (medical residents, internists) | n=2064<br>Patients presenting at the ED with a long bone fracture (femur, humerus, tibia, fibula, radius, or ulna) in two time periods: 1998-2000, n=834 of which 3% were seen by a PA, 9% by resident/intern and 90% by staff physician ; 2001-2003 8% PA, 10% resident/intern, 90% staff physician | Retrospective cohort | • Proportion of patients with long bone fracture receiving analgesia | Ritsema 2007[37] |
|--------------------|--------------------------------------------------------------------------------------------------------------------------------------------------------------------------|---------------------------------------------------------------------------------------------|---------------------------------------------------------------------------------------|---------------------------------------------------------------------------------------------------------|------------------------------------------------------------------------------------------------------------------------------------------------------------------------------------------------------------------------------------------------------------------------------------------------------|----------------------|----------------------------------------------------------------------|------------------|



1  
2  
3  
4  
5  
6  
7  
8  
9  
10  
11  
12  
13  
14  
15  
16  
17  
18  
19  
20  
21  
22  
23  
24  
25  
26  
27  
28  
29  
30  
31  
32  
33  
34  
35  
36  
37  
38  
39  
40  
41  
42  
43  
44  
45  
46  
47

---

|                    |                                                                                                                                               |                                                                                |                                                                                                                                                                                       |                                                                                             |                                                                                                                                  |                           |                                |                 |
|--------------------|-----------------------------------------------------------------------------------------------------------------------------------------------|--------------------------------------------------------------------------------|---------------------------------------------------------------------------------------------------------------------------------------------------------------------------------------|---------------------------------------------------------------------------------------------|----------------------------------------------------------------------------------------------------------------------------------|---------------------------|--------------------------------|-----------------|
| Emergency medicine | To compare the wound care practices and infection rates of wounds managed in the ED by practitioners with varying levels of medical training. | USA<br>Department of Emergency Medicine within a teaching hospital in New York | All patients with lacerations were evaluated by an attending physician who determined whether wound could be managed by a junior practitioner (PAs, students, interns, and residents) | ED patients whose wounds were managed by other providers (students, interns, and residents) | All patients with lacerations attending the ED n=1163, n=901 seen by a PA, n=262 by other providers October 1992 – November 1993 | Prospective observational | • Patient wound infection rate | Singer 1995[38] |
|--------------------|-----------------------------------------------------------------------------------------------------------------------------------------------|--------------------------------------------------------------------------------|---------------------------------------------------------------------------------------------------------------------------------------------------------------------------------------|---------------------------------------------------------------------------------------------|----------------------------------------------------------------------------------------------------------------------------------|---------------------------|--------------------------------|-----------------|

---

Peer review only

|                                                                                                                                                                                                                                                                               |                         |                                                                                                                                |                                                                  |                                                                                                                                                                                                                                                                                                                                |                                                                                          |                                       |                           |                                                                                                                                                                                                                                                                                                                                                                                                                                                                                                                                                                                                                                                                                                                                            |                    |
|-------------------------------------------------------------------------------------------------------------------------------------------------------------------------------------------------------------------------------------------------------------------------------|-------------------------|--------------------------------------------------------------------------------------------------------------------------------|------------------------------------------------------------------|--------------------------------------------------------------------------------------------------------------------------------------------------------------------------------------------------------------------------------------------------------------------------------------------------------------------------------|------------------------------------------------------------------------------------------|---------------------------------------|---------------------------|--------------------------------------------------------------------------------------------------------------------------------------------------------------------------------------------------------------------------------------------------------------------------------------------------------------------------------------------------------------------------------------------------------------------------------------------------------------------------------------------------------------------------------------------------------------------------------------------------------------------------------------------------------------------------------------------------------------------------------------------|--------------------|
| 1<br>2<br>3<br>4<br>5<br>6<br>7<br>8<br>9<br>10<br>11<br>12<br>13<br>14<br>15<br>16<br>17<br>18<br>19<br>20<br>21<br>22<br>23<br>24<br>25<br>26<br>27<br>28<br>29<br>30<br>31<br>32<br>33<br>34<br>35<br>36<br>37<br>38<br>39<br>40<br>41<br>42<br>43<br>44<br>45<br>46<br>47 | Trauma and orthopaedics | To define the clinical and financial impact of hospital-based PAs on orthopaedic trauma care at a level II community hospital. | USA<br>Orthopaedic trauma care at a level II community hospital. | Hospital-employed PAs (n=2) were utilised to cover all orthopaedic trauma needs, under the supervision of one of 18 orthopaedic surgeons. Each PA performed 12-hour day shifts for three consecutive days, January to December 2007. PAs on call carried trauma pagers and reported to the emergency room as soon as possible. | Attending surgeon as the primary orthopaedic responder for emergency department consults | n=1104<br>•n=310: PA<br>•n=687: No PA | Comparative retrospective | <ul style="list-style-type: none"> <li>•Triage time to time seen by orthopaedic service in emergency department (minutes)</li> <li>•Triage time to time of surgery (minutes)</li> <li>•Operating room complication rates (%)</li> <li>•The use of deep vein thrombosis prophylaxis (%)</li> <li>•Post-operative antibiotic administration (%)</li> <li>•Postoperative complications (%)</li> <li>•Triage time to out of emergency department (minutes)</li> <li>•Operating room set up time (minutes)</li> <li>•Average operating room time (minutes)</li> <li>•Time from wound closure to wheels out (operating room) (minutes)</li> <li>•Hospital length of stay (minutes)</li> <li>•Cost savings (emergency department) (\$)</li> </ul> | Althausen 2013[39] |
|-------------------------------------------------------------------------------------------------------------------------------------------------------------------------------------------------------------------------------------------------------------------------------|-------------------------|--------------------------------------------------------------------------------------------------------------------------------|------------------------------------------------------------------|--------------------------------------------------------------------------------------------------------------------------------------------------------------------------------------------------------------------------------------------------------------------------------------------------------------------------------|------------------------------------------------------------------------------------------|---------------------------------------|---------------------------|--------------------------------------------------------------------------------------------------------------------------------------------------------------------------------------------------------------------------------------------------------------------------------------------------------------------------------------------------------------------------------------------------------------------------------------------------------------------------------------------------------------------------------------------------------------------------------------------------------------------------------------------------------------------------------------------------------------------------------------------|--------------------|

1  
2  
3  
4  
5  
6  
7  
8  
9  
10  
11  
12  
13  
14  
15  
16  
17  
18  
19  
20  
21  
22  
23  
24  
25  
26  
27  
28  
29  
30  
31  
32  
33  
34  
35  
36  
37  
38  
39  
40  
41  
42  
43  
44  
45  
46  
47

247

|                         |                                                                                                                                                                                                                                       |                                                                                                             |                                                                                                                                                                                                                                                                                                                                                                                                         |                                                                                                                              |                                                                                                                                                                                                                                                               |                           |                                                                                                                                                                                                                                        |                   |
|-------------------------|---------------------------------------------------------------------------------------------------------------------------------------------------------------------------------------------------------------------------------------|-------------------------------------------------------------------------------------------------------------|---------------------------------------------------------------------------------------------------------------------------------------------------------------------------------------------------------------------------------------------------------------------------------------------------------------------------------------------------------------------------------------------------------|------------------------------------------------------------------------------------------------------------------------------|---------------------------------------------------------------------------------------------------------------------------------------------------------------------------------------------------------------------------------------------------------------|---------------------------|----------------------------------------------------------------------------------------------------------------------------------------------------------------------------------------------------------------------------------------|-------------------|
| Trauma and orthopaedics | To describe the effect of PAs working in an arthroplasty practice from the perspective of patients and health care providers<br>To describe the costs, time savings for surgeons and effects on surgical throughput and waiting times | Canada<br>High-volume academic arthroplasty programme employing PAs (The Concordia Joint Replacement Group) | Addition of PAs (n=3) to the operating room team. The PAs were added to the team, replacing surgical assists (usually general practitioners). The PAs took first call with their supervising physician, provided first-assist services in the operating room (OR), write postoperative tests/investigations, generate operative notes, undertake daily working rounds and complete discharge summaries. | -Costs: GP first assists in the operating room<br>-Waiting times: Patients on the arthroplasty waiting list in 2004 and 2005 | Sample size varying by outcome:<br>-Patient satisfaction n=1070<br>-Perceptions of healthcare providers and patients n=44<br>-Costs n=402 surgical procedures performed in 2006<br>-Time savings n=1409 procedures carried out 2006<br>-Waiting times in 2006 | Mixed-methods             | <ul style="list-style-type: none"> <li>• Patient satisfaction</li> <li>• Perceptions of PAs among healthcare providers and patients</li> <li>• Costs</li> <li>• Time savings</li> <li>• Waiting times</li> <li>• Throughput</li> </ul> | Bohm 2010[40]     |
| Trauma and Orthopaedics | To assess whether the type of                                                                                                                                                                                                         | USA<br>Children's                                                                                           | PAs carrying out nonoperative management of                                                                                                                                                                                                                                                                                                                                                             | Attending physician                                                                                                          | Patient charts of those aged 3 to 17 years                                                                                                                                                                                                                    | Comparative retrospective | • Fracture malunion (maximum angulation criteria) at last clinic                                                                                                                                                                       | Garrison 2017[41] |

---

provider (attending physician versus PA) or number of providers involved in the nonoperative management of a paediatric forearm fracture influenced the risk of that fracture healing as a malunion.

hospital medical centre

forearm fractures at orthopaedic clinic visits

seen at the orthopaedics department February 2012 to January 2013 n = 141

visit

---

|                         |                                                                                                                                                |                                                                                                                                                                |                                                                                                                                                                                                         |                                                                                                                                                      |                                                                                     |               |                                                                                                                                                                                                                                 |               |
|-------------------------|------------------------------------------------------------------------------------------------------------------------------------------------|----------------------------------------------------------------------------------------------------------------------------------------------------------------|---------------------------------------------------------------------------------------------------------------------------------------------------------------------------------------------------------|------------------------------------------------------------------------------------------------------------------------------------------------------|-------------------------------------------------------------------------------------|---------------|---------------------------------------------------------------------------------------------------------------------------------------------------------------------------------------------------------------------------------|---------------|
| Trauma and Orthopaedics | To describe the role of the PA in the upper-extremity surgical programme; describe the role of the PA in an operating room study; and show the | Canada<br>Subspecialised upper-extremity surgical programme at a peripheral hospital, as part of a Physician Assistant Demonstration project where 12 PAs were | One PA filling provider gaps in four areas: preoperative patient screening, assisting in operating room care (including a double room experiment), aiding in aftercare of surgery and attending to post | Pre-operative – surgeon working alone; operating room – team with surgical assistant or role unfilled and single operating room; surgery aftercare – | n=38 interviews; n=75 surveys (n= 28 from health care provider and 47 from patients | Mixed methods | <ul style="list-style-type: none"> <li>• Perceptions and experiences with the PA</li> <li>• Patient rating of quality of care</li> <li>• Expected and actual operating room times</li> <li>• Total new patients seen</li> </ul> | Hepp 2017[42] |
|-------------------------|------------------------------------------------------------------------------------------------------------------------------------------------|----------------------------------------------------------------------------------------------------------------------------------------------------------------|---------------------------------------------------------------------------------------------------------------------------------------------------------------------------------------------------------|------------------------------------------------------------------------------------------------------------------------------------------------------|-------------------------------------------------------------------------------------|---------------|---------------------------------------------------------------------------------------------------------------------------------------------------------------------------------------------------------------------------------|---------------|

---

1  
2  
3  
4  
5  
6  
7  
8  
9  
10  
11  
12  
13  
14  
15  
16  
17  
18  
19  
20  
21  
22  
23  
24  
25  
26  
27  
28  
29  
30  
31  
32  
33  
34  
35  
36  
37  
38  
39  
40  
41  
42  
43  
44  
45  
46  
47

---

|                         |                                                                                                                                                              |                                                         |                                                                               |                                                                                                                                                                                                                                                                                                               |                                                                                                          |                    |                                                                                                                                                                      |                |
|-------------------------|--------------------------------------------------------------------------------------------------------------------------------------------------------------|---------------------------------------------------------|-------------------------------------------------------------------------------|---------------------------------------------------------------------------------------------------------------------------------------------------------------------------------------------------------------------------------------------------------------------------------------------------------------|----------------------------------------------------------------------------------------------------------|--------------------|----------------------------------------------------------------------------------------------------------------------------------------------------------------------|----------------|
|                         | impact of the PA role on patients, providers and the system                                                                                                  | introduced to various healthcare settings               | discharge follow up care                                                      | replacing a post unfilled surgical extender; post discharge – surgeon only                                                                                                                                                                                                                                    |                                                                                                          |                    |                                                                                                                                                                      |                |
| Trauma and orthopaedics | To assess whether staffing changes within a Level 1 trauma centre improved mortality and shortened hospital and ICU length of stay for patients with trauma. | USA<br><br>Urban, community-based level I trauma centre | core trauma panel (consisting of full-time, in-house trauma surgeons) and PAs | Group 1: general surgery residents (staffed by full-time, in-house post-graduate year-4 general surgery residents with attending back up from home, followed by a transition to a trauma service staffed with in-house independent general surgeon attendings) ;<br>Group 2: core trauma panel (consisting of | n=15297 Trauma patients 18 years or older and not transferred from the ED to another acute care facility | Prospective cohort | <ul style="list-style-type: none"> <li>•Overall mortality</li> <li>•Mortality for patients with injury severity score (ISS) &gt;15</li> <li>•Hospital LOS</li> </ul> | Mains 2009[43] |

---

|                         |                                                                                                                                                 |                                                                        |                                                                                                                                                                             |                                                                                                                                |                                                                                                                                                                                        |                           |                                                                                                                                                                                                       |                   |
|-------------------------|-------------------------------------------------------------------------------------------------------------------------------------------------|------------------------------------------------------------------------|-----------------------------------------------------------------------------------------------------------------------------------------------------------------------------|--------------------------------------------------------------------------------------------------------------------------------|----------------------------------------------------------------------------------------------------------------------------------------------------------------------------------------|---------------------------|-------------------------------------------------------------------------------------------------------------------------------------------------------------------------------------------------------|-------------------|
|                         |                                                                                                                                                 |                                                                        |                                                                                                                                                                             | full-time, in-house trauma surgeons, without PAs or residents)                                                                 |                                                                                                                                                                                        |                           |                                                                                                                                                                                                       |                   |
| Trauma and orthopaedics | To analyze patient outcomes and efficiency of care provided for trauma patients during transition from resident physician support to PA support | USA<br>Level I Trauma Center                                           | PAs substituting for doctors in trauma alerts: PA's role was to assist the trauma surgeon at trauma alerts and trauma patient rounds, update the trauma patient census list | General and orthopaedic residents who attend in trauma alerts                                                                  | n=293-before<br>n=476-after<br>All patients evaluated by the trauma surgeons and on the trauma registry, excluding those transferred to another facility for treatment of severe burns | Before-after              | <ul style="list-style-type: none"> <li>• Collaborative relationship</li> <li>• Transfer time</li> <li>• LOS</li> <li>• Mortality rate</li> </ul>                                                      | Oswanski 2004[44] |
| Internal medicine       | To compare outcomes directly from the expanded use of PAs to those of a hospitalist group staffed with a greater proportion of attending        | USA<br>Community hospital with 26,000 adult patient discharge annually | Expanded PA group: used three physicians and three PAs daily for ward rounds with PAs expected to see 14 patients daily plus one more PA responsible for day shift          | Conventional group: Used nine physicians and two PAs for rounding, with PAs expected to see nine patient daily, plus day shift | Patients discharged between January 2012 and June 2013; n=6612 expanded PA group and n=10352 in the conventional                                                                       | Retrospective comparative | <ul style="list-style-type: none"> <li>• 30 day all-cause readmission</li> <li>• Inpatient mortality</li> <li>• Cost of care</li> <li>• Consultant/attending use</li> <li>• Length of stay</li> </ul> | Capstack 2016[45] |

1  
2  
3  
4  
5  
6  
7  
8  
9  
10  
11  
12  
13  
14  
15  
16  
17  
18  
19  
20  
21  
22  
23  
24  
25  
26  
27  
28  
29  
30  
31  
32  
33  
34  
35  
36  
37  
38  
39  
40  
41  
42  
43  
44  
45  
46  
47

---

|                                                      |                                                                                                                                                                                              |                                                                                                                                                                                                                    |
|------------------------------------------------------|----------------------------------------------------------------------------------------------------------------------------------------------------------------------------------------------|--------------------------------------------------------------------------------------------------------------------------------------------------------------------------------------------------------------------|
| physicians at the same hospital during the same time | admissions. PAs worked in dyads with ward round physician; PAs discussed the treatment plans at least once a day with the physician to a written protocol for PA-physician dyad expectations | admissions by group the physician. PAs worked in dyads with ward round physician; PAs discussed the treatment plans at least once a day with the physician. No written protocol for PA-physician dyad expectations |
|------------------------------------------------------|----------------------------------------------------------------------------------------------------------------------------------------------------------------------------------------------|--------------------------------------------------------------------------------------------------------------------------------------------------------------------------------------------------------------------|

---

|                   |                                                                                                                                                                        |                                                               |                                                                                                                                                                                                                               |                                                                                                                 |                                                                                                                                                                            |                          |                                                                                                            |                   |
|-------------------|------------------------------------------------------------------------------------------------------------------------------------------------------------------------|---------------------------------------------------------------|-------------------------------------------------------------------------------------------------------------------------------------------------------------------------------------------------------------------------------|-----------------------------------------------------------------------------------------------------------------|----------------------------------------------------------------------------------------------------------------------------------------------------------------------------|--------------------------|------------------------------------------------------------------------------------------------------------|-------------------|
| Internal medicine | To examine and compare costs, between a PA service and an intern/resident (teaching) service in the provision of inpatient care for five high-volume internal medicine | USA<br>Two general internal medicine units, teaching hospital | The use of PAs (n=16) in the provision of care within internal medicine department (64 attending physicians on rotation coverage, scheduled to admit to either a PA or teaching service, with group assignment determined one | The teaching service (32 interns/residents with an average experience of one year post-graduate medical school) | Adult patients discharged in the following diagnostic-related groups: cerebrovascular accident/stroke, pneumonia, acute myocardial infarction discharged alive, congestive | Prospective cohort study | <ul style="list-style-type: none"> <li>• Relative value units (costs)</li> <li>• Length of stay</li> </ul> | Van Rhee 2002[46] |
|-------------------|------------------------------------------------------------------------------------------------------------------------------------------------------------------------|---------------------------------------------------------------|-------------------------------------------------------------------------------------------------------------------------------------------------------------------------------------------------------------------------------|-----------------------------------------------------------------------------------------------------------------|----------------------------------------------------------------------------------------------------------------------------------------------------------------------------|--------------------------|------------------------------------------------------------------------------------------------------------|-------------------|

---

1  
2  
3  
4  
5  
6  
7  
8  
9  
10  
11  
12  
13  
14  
15  
16  
17  
18  
19  
20  
21  
22  
23  
24  
25  
26  
27  
28  
29  
30  
31  
32  
33  
34  
35  
36  
37  
38  
39  
40  
41  
42  
43  
44  
45  
46  
47

|               |                                                                                              |                                                                                                                                      |                                                                                                                                                                                        |               |                                                                                                                                                                             |                       |                                                                                                                                    |                     |
|---------------|----------------------------------------------------------------------------------------------|--------------------------------------------------------------------------------------------------------------------------------------|----------------------------------------------------------------------------------------------------------------------------------------------------------------------------------------|---------------|-----------------------------------------------------------------------------------------------------------------------------------------------------------------------------|-----------------------|------------------------------------------------------------------------------------------------------------------------------------|---------------------|
|               | diagnostic related groups                                                                    |                                                                                                                                      | year in advance).                                                                                                                                                                      |               | heart failure, gastro-intestinal haemorrhage: n=923, of which n=409 PA and n=514 teaching service                                                                           |                       |                                                                                                                                    |                     |
| Mental health | To examine the role of PAs in the care of patients with severe and persistent mental illness | Canada<br>Assertive community treatment team, providing multidisciplinary care to patients with severe and persistent mental illness | A PA was hired to assist with intake psychiatric assessments, physical examinations, and follow-up of psychiatric and medical complaints in a model of PA supervised by a psychiatrist | No comparison | Assertive community treatment team members (three social workers, one psychiatrist, two psychiatric nurses, one occupational therapist, one recreational therapist, the PA) | Qualitative interview | <ul style="list-style-type: none"> <li>Perceived effect and challenges of delivering psychiatric care with the PA model</li> </ul> | McCutcheon 2017[47] |



1  
2  
3 248 In summary, seven studies were included from emergency medicine,[32-38] six studies  
4  
5 249 reported from trauma and orthopaedics,[39-44] two from acute internal medicine,[44,45] and  
6  
7 250 one from mental health.[47] No studies were identified from care of the elderly medicine.  
8  
9 251 .  
10  
11 252 The publication year ranged from 1995[38] to 2017,[36,41,42,47]. The majority were from  
12  
13 253 the USA (n=12), with four from Canada.[32,38,42,47]. The studies measured a number of  
14  
15  
16 254 outcomes; results are shown in Table 2.  
17  
18  
19  
20  
21  
22  
23  
24  
25  
26  
27  
28  
29  
30  
31  
32  
33  
34  
35  
36  
37  
38  
39  
40  
41  
42  
43  
44  
45  
46  
47  
48  
49  
50  
51  
52  
53  
54  
55  
56  
57  
58  
59  
60

255 **Table 2: Main findings of included studies**

| Specialty          | Outcome measures                                         | Finding(s)                                                                                                                                                                                                                                                                                                         | Quality score | Key limitations                                                                                                                                                   | Study details      |
|--------------------|----------------------------------------------------------|--------------------------------------------------------------------------------------------------------------------------------------------------------------------------------------------------------------------------------------------------------------------------------------------------------------------|---------------|-------------------------------------------------------------------------------------------------------------------------------------------------------------------|--------------------|
| Emergency medicine | Length of visit (LOV)                                    | Small but clinically insignificant differences (regression coefficient -8): LOV was 8 minutes longer when patients were treated by a PA (mean 82 minutes) than a physician (mean 75 minutes) (95% CI -10 to -6, p<0.001), although difference ranged from 5 to 32 minute difference dependent on patient condition | 82%           | <ul style="list-style-type: none"> <li>Not randomised</li> <li>Differences by patient condition not explained</li> <li>Limited control for confounders</li> </ul> | Arnopolin 2000[32] |
|                    | Total charge                                             | Mean total charge was \$159 when patients were treated by a PA and \$164 by a physician (95% CI: 2 to 14, p=0.013), regression coefficient -8                                                                                                                                                                      |               |                                                                                                                                                                   |                    |
| Emergency medicine | Leaving without being seen                               | Absolute improvement (not controlling for hospital or acuity) from 6.5 to 4.9%; when a PA was on duty, the likelihood that a patient left without being seen was less than half (44% [95% CI 31% to 63%] p < 0.01), controlling for hospital and patient acuity                                                    | 73%           | <ul style="list-style-type: none"> <li>Two months data</li> <li>Sample size unclear</li> </ul>                                                                    | Ducharme 2009[33]  |
|                    | Wait time (triage to initial assessment)                 | When a PA was involved in patient care, the odds of the patient being seen within the benchmark wait time was 1.6 times greater than when the PA was not involved (95%CI 1.3 to 2.1) p <0.05, adjusting for hospital, acuity and time of day                                                                       |               |                                                                                                                                                                   |                    |
|                    | LOS in ED                                                | When a PA was involved in patient care, the LOS in the ED was shorter (mean: 262.4 mins versus 182.9 mins) than when a PA was not present (30.3% [95% CI 21.6% to 39%]), p < 0.01                                                                                                                                  |               |                                                                                                                                                                   |                    |
| Emergency medicine | Proportion of visits in which medications are prescribed | Significant differences were observed between PAs if compared to physicians and to NPs in the proportion of visits in which medication was prescribed: PAs 77.9%, physicians 75.5%, nurse practitioners 75.4% (p=0.001)                                                                                            | 73%           | <ul style="list-style-type: none"> <li>Secondary data analysis</li> <li>No adjustment</li> <li>Treatment outcomes/appropriate</li> </ul>                          | Hooker 2008[34]    |
|                    | Mean number of                                           | There were no significant differences among the three providers in mean                                                                                                                                                                                                                                            |               |                                                                                                                                                                   |                    |

| Specialty          | Outcome measures                                                   | Finding(s)                                                                                                                                                                                                                            | Quality score | Key limitations                                                                                                                                  | Study details      |
|--------------------|--------------------------------------------------------------------|---------------------------------------------------------------------------------------------------------------------------------------------------------------------------------------------------------------------------------------|---------------|--------------------------------------------------------------------------------------------------------------------------------------------------|--------------------|
|                    | prescriptions written per visit                                    | number of prescriptions per visit (PA and physician 1.7, nurse practitioner 1.6)                                                                                                                                                      |               | ness not assessed                                                                                                                                |                    |
|                    | Non-narcotic analgesics prescriptions                              | There were no significant differences among the three providers in the frequency of prescribing non-narcotic analgesics (p=0.16).                                                                                                     |               |                                                                                                                                                  |                    |
|                    | Narcotic analgesics/NSAID S prescription by type of provider       | There were no significant differences among the three prescribers in the frequency of narcotic analgesics or NSAIDS recorded (p=0.15 and p=0.06, respectively)                                                                        |               |                                                                                                                                                  |                    |
| 256                |                                                                    |                                                                                                                                                                                                                                       |               |                                                                                                                                                  |                    |
| Emergency medicine | Analgesia prescribing                                              | Emergency physicians gave some form of ED analgesia to 29% of patients, as compared with 10% of patients seen by PAs (OR=3.58 [CI 95% 2.05 to 6.24]), adjusting for sex, reported degree of pain and fracture                         | 92%           | <ul style="list-style-type: none"> <li>Dependent on patient recall</li> </ul>                                                                    | Kozlowski 2002[35] |
| Emergency medicine | 72-hour revisits to the ED                                         | Patients treated only by PAs had significantly lower return rates (6.8%) than for the PA/emergency physician combined group (9.3%) and the emergency physician only group (8.0%), p=0.03.                                             | 77%           | <ul style="list-style-type: none"> <li>No adjustment for significant differences in patient age, admission rate or patient complexity</li> </ul> | Pavlick 2017[36]   |
| Emergency medicine | Proportion of patients with long bone fracture receiving analgesia | Patients seen by PAs had more than twice the odds of receiving opiates/narcotics (OR=2.05% [95%CI 1.24 to 3.29]) and were more likely to receive other analgesics (OR=1.72% [95%CI 0.94 to 3.17]) compared with those not seen by PAs | 100%          | <ul style="list-style-type: none"> <li>Changes in workload and documentation could have confounded results</li> </ul>                            | Ritsema 2007[37]   |
| Emergency medicine | Patient wound infection rate                                       | There were no significant differences in wound infection rates by practitioner level of training (medical students, 0/60[0%]; all residents, 17/547[3.1%]; physician assistants, 11/305[3.6%]; and attending                          | 67%           | <ul style="list-style-type: none"> <li>Hawthorne effect</li> <li>Differences in wounds not controlled for</li> </ul>                             | Singer 1995[38]    |

|                         |                                                                               |                                                                                                                                               |     |
|-------------------------|-------------------------------------------------------------------------------|-----------------------------------------------------------------------------------------------------------------------------------------------|-----|
|                         |                                                                               | physicians 14/251[5.6%]; p=0.14)                                                                                                              |     |
| Trauma and orthopaedics | Triage time to time seen by orthopaedic service (emergency department) (mins) | PA presence resulted in a 205 minutes faster orthopaedic service response time (366 versus 571 mins; p=0.0006)                                | 91% |
|                         | Triage time to time of surgery (ER) (mins)                                    | PA presence resulted in a 360 minutes improvement in time to surgery (1139 versus 1499 mins; p=0.03)                                          |     |
|                         | Operating room complication rates (%)                                         | There was no significant difference in the proportion of operating room complications with or without PAs (both 0.65%; p=0.9972)              |     |
|                         | The use of deep vein thrombosis prophylaxis (%)                               | The use of deep vein thrombosis prophylaxis increased by a mean of 6.73 percentage points (60.69 versus 53.96%; p = 0.0084) with PA presence. |     |
|                         | Post-operative antibiotic administration (%)                                  | Post-operative antibiotic administration increased by 2.88 percentage points with PA presence (94.35 versus 91.47%; p=0.0302)                 |     |
|                         | Postoperative                                                                 | There was a 4.67 percentage points decrease in postoperative                                                                                  |     |

- Exact cost savings difficult to determine
- Did not have a way of calculating savings for the time it took for patients to reach the OR from the time of triage
- Single site with two PAs

For peer review only

|                                                               |                                                                                                                                                                                                                 |  |
|---------------------------------------------------------------|-----------------------------------------------------------------------------------------------------------------------------------------------------------------------------------------------------------------|--|
| complications (%)                                             | complications with PA presence (8.16 versus 12.83%; p=0.0034)                                                                                                                                                   |  |
| Triage time to out of emergency department (mins)             | There was a 176 minutes decrease in total ER time with PA presence (270 versus 446 mins; p<0.001)                                                                                                               |  |
| Operating room set up time (mins)                             | There was a marginally improved operating room set up time by 0.43 minutes with PA presence (26.6 versus 24 mins; p=0.0034)                                                                                     |  |
| Time from wound closure to wheels out (operating room) (mins) | There was no significant difference for this outcome when the PA was present (7.8 versus 7.6 mins; p=0.5914)                                                                                                    |  |
| Average operating room time (mins)                            | There was no significant difference in the average operating room time when the PA was present (70 versus 74 mins; p=0.44)                                                                                      |  |
| Cost savings (emergency department) (\$)                      | Based on 50% collection of PA charges and emergency department time savings, per orthopaedic trauma patient seen, PAs saved the hospital \$133.53 per patient, resulting in \$41,394 in one year (310 patients) |  |
| Cost savings (operating room) (\$)                            | The presence of a PA in the operating room resulted in savings of \$3,207 based on operating room costs (only set up time was decreased with presence of the PA).                                               |  |
| Hospital length of stay (days)                                | There was no significant difference in the hospital LOS when the PA was present if compared to when the presence and the absence of PAs (7.96 versus 8.57 days; p=0.2662)                                       |  |

|                         |                                                            |                                                                                                                                                                                                                                                                                                                                      |     |                                                                                                                                                                                                                   |               |
|-------------------------|------------------------------------------------------------|--------------------------------------------------------------------------------------------------------------------------------------------------------------------------------------------------------------------------------------------------------------------------------------------------------------------------------------|-----|-------------------------------------------------------------------------------------------------------------------------------------------------------------------------------------------------------------------|---------------|
| Trauma and orthopaedics | Patient satisfaction                                       | 91.3% of hip patients (total= 626, 58.5% response) reported being satisfied or very satisfied and 87.7% of knee patients reported being satisfied or very satisfied with PAs at one year follow-up (after surgery)                                                                                                                   | 32% | <ul style="list-style-type: none"> <li>• Methods are not fully described e.g. no description of data analysis</li> <li>• Sample is not described</li> <li>• Is this a study about PAs or about the two</li> </ul> | Bohm 2010[40] |
|                         | Perceptions of healthcare providers and patients about PAs | <p>Patients: Overall patients expressed very positive opinions of PAs who were helpful in providing information and explaining aspects of their care</p> <p>Ward nurses: felt that patient care, information flow and patient rounds were enhanced by the PAs; ambiguous as to whether PA tasks fell within the scope of nursing</p> |     |                                                                                                                                                                                                                   |               |

Orthopaedic surgeons: overall the surgeons had very positive opinions of PAs – 100% agreement with all survey items: ‘a fully trained PA provides surgical assistance equal to an R5 (fifth year of a residency programme)’; ‘the presence of PA has improved your job satisfaction’; ‘the presence of a PA has safely allowed you to do more surgical volume’; ‘the care of your patients in the OR is improved by the assistance of PAs’; ‘PAs greatly decrease the amount of “scut work” that you have to do’

Operating room nurses: overall OR nurses reported that PAs were valuable team members; improved the care of orthopaedic surgery patients in the operating room; provided surgical assistance superior to family practitioners; and were necessary to run two operating rooms

Orthopaedic residents: nearly unanimous that PAs reduced their workload and they generally felt that PAs relieved them of clinical responsibilities so that they could attend teaching.

room operating model?

- Patient satisfaction with the surgery at one year cannot be attributed to the PA

|                         |                                                                                                                                                                                                                                                          |                                                                                                                                                                |     |                                                                                                                                                   |
|-------------------------|----------------------------------------------------------------------------------------------------------------------------------------------------------------------------------------------------------------------------------------------------------|----------------------------------------------------------------------------------------------------------------------------------------------------------------|-----|---------------------------------------------------------------------------------------------------------------------------------------------------|
| Costs                   | The cost of employing three PAs in 2006 (between \$270,000 AND \$327000) was found to be similar to the foregone general practitioner (GP) surgical assist fees of \$270226.88.                                                                          |                                                                                                                                                                |     |                                                                                                                                                   |
| Time savings            | PAs were found to “free up” 204 hours per year (the equivalent of four 50-hour work weeks), for their supervising physician (p=not reported). Furthermore, they potentially freed GPs from the operating room to spend more time delivering primary care |                                                                                                                                                                |     |                                                                                                                                                   |
| Throughput              | Increased the volume from three to seven primary joint surgeries per day through the use of double rooms in 2006                                                                                                                                         |                                                                                                                                                                |     |                                                                                                                                                   |
| Waiting time            | Median wait time for surgery decreased from 44 to 30 weeks                                                                                                                                                                                               |                                                                                                                                                                |     |                                                                                                                                                   |
| Trauma and orthopaedics | Fracture malunion (maximum angulation criteria) at last clinic visit                                                                                                                                                                                     | Likelihood of malunion did not differ significantly if the providers included a PA or not (28% versus 56%, Fishers exact p=0.13) or by number of PAs (p=0.11). | 82% | <ul style="list-style-type: none"> <li>• Unadjusted comparisons</li> <li>• Difficult to assess how much of the care was carried out by</li> </ul> |

1  
2  
3  
4  
5  
6  
7  
8  
9  
10  
11  
12  
13  
14  
15  
16  
17  
18  
19  
20  
21  
22  
23  
24  
25  
26  
27  
28  
29  
30  
31  
32  
33  
34  
35  
36  
37  
38  
39  
40  
41  
42  
43  
44  
45  
46  
47

|                         |                                                                                            |                                                                                                                                                                                                                                                                                                                                                                                                                                                                                                                                                                                                                                                                                                                                     |      |                                                                                                                                                     |                                                                                     |
|-------------------------|--------------------------------------------------------------------------------------------|-------------------------------------------------------------------------------------------------------------------------------------------------------------------------------------------------------------------------------------------------------------------------------------------------------------------------------------------------------------------------------------------------------------------------------------------------------------------------------------------------------------------------------------------------------------------------------------------------------------------------------------------------------------------------------------------------------------------------------------|------|-----------------------------------------------------------------------------------------------------------------------------------------------------|-------------------------------------------------------------------------------------|
|                         |                                                                                            |                                                                                                                                                                                                                                                                                                                                                                                                                                                                                                                                                                                                                                                                                                                                     |      |                                                                                                                                                     | PAs (analysis is cases with any PA involvement versus cases with no PA involvement) |
| Trauma and orthopaedics | <ul style="list-style-type: none"> <li>Perceptions and experiences with the PA</li> </ul>  | <ul style="list-style-type: none"> <li>Preoperative care: PA triages, conducts most activities without direct supervision</li> <li>Operating room: PAs' integration into the OR went well; staff appreciate consistency of the PA; PA acquired skills in a graduated manner – now “preps and closes with patients in OR”</li> <li>Postoperative care: takes on some of surgical extender role but the role is missed after hours; PA sees 60-70% of all inpatients, freeing up the surgeon; full integration limited by needs for co-signature and verification of orders</li> <li>Follow-up outpatient care: clinic flow improved</li> <li>PA is a collaborative member of the team (most mean ratings &gt;4 out of 5).</li> </ul> | 55%  | <ul style="list-style-type: none"> <li>Unable to ascertain which data are descriptive quantitative or gained from qualitative interviews</li> </ul> | Hepp 2017[42]                                                                       |
|                         | <ul style="list-style-type: none"> <li>Patient rating of quality of care</li> </ul>        | All patients responded positively to the PA role; overall rating of PA care of 9.65 of 10                                                                                                                                                                                                                                                                                                                                                                                                                                                                                                                                                                                                                                           |      |                                                                                                                                                     |                                                                                     |
|                         | <ul style="list-style-type: none"> <li>Expected and actual operating room times</li> </ul> | Double room experiment: actual preparation time 39% longer than expected and postsurgery time 37% less than expected (absolute times not given) surgeon time 21% less; two hour/day saving                                                                                                                                                                                                                                                                                                                                                                                                                                                                                                                                          |      |                                                                                                                                                     |                                                                                     |
|                         | Total new patients seen                                                                    | Preoperative care: 30% increase in numbers of patients seen, noticed in the first year                                                                                                                                                                                                                                                                                                                                                                                                                                                                                                                                                                                                                                              |      |                                                                                                                                                     |                                                                                     |
| Trauma and orthopaedics | Overall mortality                                                                          | The introduction of PAs to the core trauma panel (group 3 versus group 2) decreased overall mortality (2.80% versus 3.76%, adjusted OR=0.74 [CI95% 0.55 to 0.99], p=0.05). Furthermore, the introduction of PAs to general surgery residents (group 3 versus group 1) decreased overall mortality (2.32% versus 3.82%, adjusted OR=0.6 [CI95% 0.45 to 0.81], p=0.003)                                                                                                                                                                                                                                                                                                                                                               | 100% | <ul style="list-style-type: none"> <li>Not all the covariates which could be significantly associated with outcomes were</li> </ul>                 | Mains 2009[43]                                                                      |

|    |            |                  |                                                                              |     |                         |
|----|------------|------------------|------------------------------------------------------------------------------|-----|-------------------------|
| 1  |            |                  |                                                                              |     |                         |
| 2  |            |                  |                                                                              |     |                         |
| 3  |            |                  |                                                                              |     |                         |
| 4  |            |                  |                                                                              |     |                         |
| 5  |            | Mortality for    | The introduction of PAs to the core trauma panel (group 3 versus group       |     | collected (e.g.         |
| 6  |            | patients with    | 2) decreased overall mortality for patients with injury severity score (ISS) |     | changes in care)        |
| 7  |            | injury severity  | >15 (9.67% versus 12.21%, adjusted OR=0.77 [CI95% 0.55 to 0.99],             |     | • The group 1 period    |
| 8  |            | score (ISS) >15  | p=0.13). Furthermore, the introduction of PAs to general surgery             |     | was characterised by a  |
| 9  |            |                  | residents (group 3 versus group 1) decreased overall mortality in this       |     | transition from on-call |
| 10 |            |                  | patients (9.03% versus 14.83%, adjusted OR=0.6 [CI95% 0.41 to 0.80],         |     | attending surgeons to   |
| 11 |            |                  | p=0.003)                                                                     |     | in-house surgeons and   |
| 12 |            |                  |                                                                              |     | the outcomes may not    |
| 13 |            | Hospital LOS     | The introduction of PAs to the core trauma panel (group 3 versus group       |     | be homogenous across    |
| 14 |            |                  | 2) reduced mean and median hospital LOS (4.32 days versus 4.69 days,         |     | the study period        |
| 15 |            |                  | p=0.05; and 3.74 days versus 3.88 days, p= 0.02, respectively). As well,     |     | • Other changes were    |
| 16 |            |                  | the introduction of PAs to general surgery residents (group 3 versus         |     | made, not just          |
| 17 |            |                  | group 1) reduced mean and median hospital LOS (4.32 days versus 4.62         |     | individual staff type   |
| 18 |            |                  | days, p=0.05; and 3.74 days versus 3.94 days, p= 0.003, respectively)        |     |                         |
| 19 |            |                  |                                                                              |     |                         |
| 20 | Trauma     | Collaborative    | Participation during trauma alert calls: PA 100%; resident 51% overall,      | 82% | • Investigators not     |
| 21 | and        | relationship     | 88% during on duty hours; Involvement in minor procedures PA 100%            |     | blinded and all work    |
| 22 | orthopaedi |                  | when residents off-duty, 91% overall; resident 95% during on duty hours,     |     | in the trauma centre    |
| 23 | cs         |                  | 83% overall.                                                                 |     | investigated.           |
| 24 |            | Transfer time    | After controlling for age, gender, race and severity of illness, there was   |     | • No sample size        |
| 25 |            |                  | no significant difference in the mean transfer rate overall or for any       |     | calculation             |
| 26 |            |                  | subpopulation (destination) between years 1998 and 1999                      |     | • Single site with two  |
| 27 |            |                  |                                                                              |     | PAs                     |
| 28 |            | LOS              | After controlling for age, gender, race and severity of injury, there was no |     | • Minimal description   |
| 29 |            |                  | significant difference in the mean LOS overall between years 1998 and        |     | of data collection      |
| 30 |            |                  | 1999                                                                         |     | method                  |
| 31 |            |                  |                                                                              |     |                         |
| 32 |            |                  |                                                                              |     |                         |
| 33 |            | Mortality rate   | Mortality rate for all patients admitted to the trauma service was 2.2% for  |     |                         |
| 34 |            |                  | both 1998 (8/293) and 1999 (13/479)                                          |     |                         |
| 35 |            |                  |                                                                              |     |                         |
| 36 | Internal   | 30 day all-cause | No statistically significant difference in odds of readmission between       | 91% | • Non randomised        |
| 37 | medicine   | readmission      | expanded PA (14%) and conventional PA (13.7%) groups (OR 0.95 [95%           |     | patient allocation      |
| 38 |            |                  | CI, 0.87 -1.04]; p=0.27)                                                     |     | Capstack                |
| 39 |            |                  |                                                                              |     | 2016[45]                |
| 40 |            |                  |                                                                              |     |                         |
| 41 |            |                  |                                                                              |     |                         |
| 42 |            |                  |                                                                              |     |                         |
| 43 |            |                  |                                                                              |     |                         |
| 44 |            |                  |                                                                              |     |                         |
| 45 |            |                  |                                                                              |     |                         |
| 46 |            |                  |                                                                              |     |                         |
| 47 |            |                  |                                                                              |     |                         |



|                   |                                                                                  |                                                                                                                                                                                                                                                                                                                                                                                                                                                                                                                                                                                                                                                                                                          |     |                                                                                                                                                                          |
|-------------------|----------------------------------------------------------------------------------|----------------------------------------------------------------------------------------------------------------------------------------------------------------------------------------------------------------------------------------------------------------------------------------------------------------------------------------------------------------------------------------------------------------------------------------------------------------------------------------------------------------------------------------------------------------------------------------------------------------------------------------------------------------------------------------------------------|-----|--------------------------------------------------------------------------------------------------------------------------------------------------------------------------|
|                   | Inpatient mortality                                                              | No statistically significant difference in odds of mortality between expanded PA (1.3%) and conventional PA (0.99%) groups (OR 0.89 [95% CI, 0.66 -1.19]; p=0.42)                                                                                                                                                                                                                                                                                                                                                                                                                                                                                                                                        |     | <ul style="list-style-type: none"> <li>• Use of secondary data</li> <li>• Readmission to the same hospital only</li> </ul>                                               |
|                   | Cost of care                                                                     | Statistically significant difference in mean patient charge between expanded PA (\$7822) and conventional PA (\$7755) groups (3.52% lower [95% CI, 2.66% -4.39%]; p<0.001)                                                                                                                                                                                                                                                                                                                                                                                                                                                                                                                               |     |                                                                                                                                                                          |
|                   | Consultant use                                                                   | No statistically significant difference in utilisation of consultants between expanded PA (1.3%) and conventional PA (0.99%) groups (OR 1.0 [95% CI, 0.94 -1.07]; p=0.90)                                                                                                                                                                                                                                                                                                                                                                                                                                                                                                                                |     |                                                                                                                                                                          |
|                   | Length of stay                                                                   | No statistically significant difference in length of stay between expanded PA (4.1 +/- 3.9 days) and conventional PA (4.3 +/- 5.6 days) groups (effect size, 0.99 days shorter [95% CI, 0.97-1.01 days]; p=0.90)                                                                                                                                                                                                                                                                                                                                                                                                                                                                                         |     |                                                                                                                                                                          |
| Internal medicine | Relative value units (RVUs i.e. costs)                                           | 1) Radiology RVUs: There were no statistically significant differences between PAs and residents; 2) Total RVUs (excluding pharmacy data): PAs used significantly fewer resources when compared to resident services for pneumonia care (p = .004), although had a higher mortality rate (% and p value not reported). For all other diagnoses there were no statistically significant differences in total RVUs between PAs and residents; 3) Laboratory RVUs: There were statistically significant differences between PAs and residents in laboratory relative value units for stroke (p = .015), pneumonia (p = .003) and CHF (p = .004). In each case PAs' RVUs were lower than those of residents. | 86% | <ul style="list-style-type: none"> <li>• RVU figures are not explained</li> <li>• Non-random group assignment</li> <li>• Single centre</li> </ul>                        |
|                   | Length of Stay (LOS)                                                             | There were no significant differences in LOS between PAs and residents after adjusting for admitting physician effect and other covariates                                                                                                                                                                                                                                                                                                                                                                                                                                                                                                                                                               |     |                                                                                                                                                                          |
| Mental health     | Perceived effect and challenges of delivering psychiatric care with the PA model | Participants described: improved access to primary care for patients; more timely access to psychiatric appointments and longer appointments; equal team cohesion for the PA or the psychiatrist; decreased wait times and improved access to tertiary care and screening programmes; and implementation challenges of triage hierarchy and patient understanding of the term physician assistant                                                                                                                                                                                                                                                                                                        | 45% | <ul style="list-style-type: none"> <li>• Qualitative analysis methods described without detail</li> <li>• Short report with overview of themes; no quotations</li> </ul> |

1  
2  
3  
4  
5  
6  
7  
8  
9  
10  
11  
12  
13  
14  
15  
16  
17  
18  
19  
20  
21  
22  
23  
24  
25  
26  
27  
28  
29  
30  
31  
32  
33  
34  
35  
36  
37  
38  
39  
40  
41  
42  
43  
44  
45  
46  
47

257

For peer review only

1  
2  
3 Two studies employed mixed methods [40,42]; one study used a qualitative analysis [47], the  
4 remainder employed quantitative approaches. Five quantitative studies analysed  
5 prospectively collected data [35,38,40,43,46,] and seven used a retrospective  
6 analysis.[32,33,34,36,39,42,45]. All studies but one [46] were observational.  
7  
8  
9  
10

### 11 12 13 **Methodological quality**

14  
15 The studies were of variable methodological quality. The mean quality score was 79% (SD  
16 0,20), median 82%, minimum 32%, [40] maximum 100%, [37,43] IQR 73,92. Figure 1  
17 presents a summary of the degree to which the included evidence met the criteria of  
18 methodological quality and shows that the most important methodological flaws in the  
19 included quantitative studies were the failure to adjust the analysis for confounding variables,  
20 the absence of information to evaluate participants' selection adequacy, and the lack of  
21 information about baseline and/or demographic information of the investigated participants.  
22 Overall, the quality of the included qualitative evidence was low, mainly due to insufficient  
23 description of the sampling strategy, data collection and analysis methods.[40,44,47]  
24  
25  
26  
27  
28  
29  
30  
31  
32  
33  
34  
35  
36

### 37 **Synthesis of findings on the impact of physician associates**

38  
39 We organised our findings by secondary care specialty. Within each specialty, we described  
40 the findings within the quality dimensions, [24] presenting the dimension with the largest  
41 number of studies within each specialty.  
42  
43  
44  
45  
46  
47

#### 48 **Emergency medicine**

49  
50 The seven studies in emergency medicine variously compared clinical care offered by PAs  
51 and physicians of various grades[34,35, 36,37] and operational/service measures.[32,33] In  
52 only two of these studies was the comparison of PAs and other physicians in a system where  
53  
54  
55  
56  
57  
58

1  
2  
3 the PAs were described as working ‘solo’, substituting for physicians at particular times of  
4  
5 the day[32] or seeing patients without the input of the attending physician.[36]  
6  
7

8 Waiting or access\_outcomes were reported in one Canadian study; [33] the outcomes were  
9  
10 leaving without being seen and waiting times. The presence of a PA was reported as  
11  
12 significantly reducing the likelihood of a patient leaving without being seen by 44% (95% CI  
13  
14 31% to 63%,  $p < 0.01$ ), the crude rate being 6.5 without and 4.9% with a PA). The odds of  
15  
16 a patient being seen within their benchmark wait time was 1.6 times greater (95% CI 1.3 to  
17  
18 2.1,  $p < 0.05$ ) when the PA was involved in the patient’s care, with these analyses  
19  
20 strengthened by adjustment for hospital, time of patient visit and acuity level.[33] However,  
21  
22 the PA was an additional staff resource rather than a substitute in this study, giving extra  
23  
24 coverage at the busiest times, alongside also newly appointed nurse practitioners, who  
25  
26 increased the odds of being seen on target more than the PAs did, with an odds ratio of 2.1.  
27  
28

29  
30 Length of stay was considered in two studies,[32,33] with contradictory results in the  
31  
32 comparison against physicians, from different interventions in terms of PAs. Arnopolin and  
33  
34 Smithline (2000)[32] reported experienced ED PAs and physicians working solo at different  
35  
36 times of day in a satellite unit. This study provided a direct comparison (and control for  
37  
38 patient age in the analysis), with a result of a statistically significantly mean longer length of  
39  
40 visit (eight minutes) for patients of PAs (82 minutes versus the physicians’ 75 minutes, 95%  
41  
42 CI -10 to -6,  $p < 0.001$ ), but also noted that differences in length of visit varied by diagnostic  
43  
44 group, with PAs’ patients between five and 32 minutes longer. In contrast, Ducharme et  
45  
46 al[33] reported that where PAs were an additional staff resource alternating with nurse  
47  
48 practitioners, PAs reduced their length of stay by 30% (mean 80 minute reduction, 183  
49  
50 minutes versus 262 minutes, 95% CI 21.6% to 39%,  $p < 0.01$ ) .  
51  
52  
53  
54  
55  
56  
57  
58

1  
2  
3 Cost was considered through total charge (hospital and physician charge) for the visit, [32]  
4  
5 with a small but statistically significant decrease per patient reported when patients were  
6  
7 treated by a PA, with differences (not statistically significant) by diagnostic groups.  
8  
9

10 Treatments offered, in terms of analgesia prescribing, were reported in three studies,  
11  
12 [34,35,37] with conflicting findings. Secondary analysis of national (USA) ED survey data  
13  
14 (1995 to 2004) reported no significant difference by type of provider in frequency of  
15  
16 prescribing narcotic or non-narcotic analgesics and in the mean number of prescriptions per  
17  
18 visit, but did observe a statistically significantly higher proportion of PAs' cases receiving a  
19  
20 prescription compared with those of physicians and nurse practitioners (PAs 77.9%,  
21  
22 physicians 75.5%, nurse practitioners 75.4%,  $p=0.001$ ).[34] No adjustment for potential  
23  
24 confounders was made. Using the same national survey data but for a subset for long bone  
25  
26 fractures, secondary analysis for 1998 to 2003 reported similarly, with those seen by a PA  
27  
28 having adjusted odds of 2.05 for receiving opiate analgesia in the ED (95% CI 1.24 to  
29  
30 3.29).[37] This well powered retrospective cohort study of high quality differs from another  
31  
32 study of similar quality with somewhat contrasting findings [35] in which for patients  
33  
34 contacted at an undefined time (average three days following their ED visit) those attended  
35  
36 by an emergency physician had adjusted odds of 3.58 (95% CI 2.05 to 6.24) for receiving  
37  
38 pain medication while in the ED (29% of their patients) compared to those attended by PAs  
39  
40 (10% of their patients), in a prospective cohort study based on patient self-report.[35]  
41  
42  
43 Although the period of time for this study is not specified, it first reported in 1998, perhaps  
44  
45 suggesting the same decade of data was involved. These three studies did not report the PAs'  
46  
47 place in the team or whether they added to or substituted for members of the medical team,  
48  
49 nor whether they saw patients as part of a team or solo.  
50  
51  
52

53  
54 Two studies considered clinical outcomes of care. One, the oldest study in the review [38],  
55  
56 from 1995, reported that in a large sample of patients presenting with lacerations at the ED  
57  
58

1  
2  
3 and seen by PAs there was no statistically significant difference in wound infection rates, ,  
4  
5 compared to other medical staff providers (medical students, residents and attending  
6  
7 physicians).[38] However, the authors noted a potential Hawthorne effect as all wounds had  
8  
9 been evaluated by an attending physician prior to allocation to one of the medical team  
10  
11 members, based on their level of training. It was noted that PAs in this study, with nine to 12  
12  
13 years' experience, were classified as experienced (not junior) practitioners. The other, newer,  
14  
15 study[36] used a proxy measure of clinical safety, that is the 72-hour re-attendance  
16  
17 (recidivism) rate to the ED for children aged six and younger, and reports that this was  
18  
19 significantly lower for those patients treated only by a PA (6.8% versus emergency physician  
20  
21 8.0%,  $p=0.03$ ), in a large study. However, these rates were unadjusted, and the characteristics  
22  
23 of the study population show statistically significantly different mean ages and rate of  
24  
25 admission in the patients treated in each group, with PAs seeing the older of the children who  
26  
27 were much less likely to be admitted. Although analysis of the recidivism rates by  
28  
29 Emergency Severity Index score for patients seen by PAs versus doctors found no  
30  
31 statistically significant differences between groups and the authors conclude that PA  
32  
33 providers deliver comparable care; the authors themselves consider that it is not known if  
34  
35 PAs would have made the same decisions as physicians for the same group of patients.  
36  
37  
38  
39  
40  
41  
42  
43  
44  
45  
46  
47  
48  
49  
50  
51

52 Trauma and orthopaedics  
53  
54  
55  
56  
57  
58  
59  
60

1  
2  
3 Six papers reported on PAs working in trauma and orthopaedics. These spanned a 14 year  
4 period. Four [39,41,43,44] focused on an aspect of provision of a hospital trauma service;  
5  
6 and two considered planned inpatient care.[38,42]  
7  
8  
9

10  
11  
12  
13 Three studies described how PAs were substituting for doctors, for residents [44] or surgical  
14 assistants [40,42], whilst the others presented service re-organisations of which PAs were a  
15 part, seemingly an addition to the pre-existing medical team [39,41,43] The outcomes  
16 assessed were numerous - patient satisfaction, perceptions of other clinical staff, costs, time  
17 of various aspects of care, patient throughput, length of stay, fracture malunion and operative  
18 complications and mortality. The strength of evidence for each outcome is now assessed.  
19  
20  
21  
22  
23  
24  
25

26  
27 Two prospective studies of the addition of PAs to surgical teams, pre-, intra- and post-  
28 operatively [40,42] reported both patient satisfaction and acceptability of PAs to other  
29 clinical staff from surveys of these groups. Positive results were presented from both studies'  
30 patient satisfaction surveys, in large[40] and small[42] response numbers, reporting 91.3% of  
31 hip and 87.7% of knee patients being satisfied or very satisfied[40] and an overall rating of  
32 PA care of 9.65 out of 10[42] although no comparator data were collected. The reports of  
33 staff were more mixed by staff group in Bohm's study[40] with physician team members  
34 being positive (100% agreement with all survey items on the positive contribution of PAs)  
35 and nursing staff more equivocal, expressing concern about the overlap of tasks traditionally  
36 considered to be the responsibility of nurses; and by impact in different parts of the surgical  
37 journey in Hepp's[42] study, where staff ratings were mostly above four out of five, agreeing  
38 or strongly agreeing that the PA was a collaborative team member. Staff appreciated  
39 continuity and PA advances in skills in the operating room, but did not feel the role could  
40  
41  
42  
43  
44  
45  
46  
47  
48  
49  
50  
51  
52  
53  
54  
55  
56  
57  
58  
59  
60

1  
2  
3 offer everything a previous surgical extender did post-operatively, despite being a  
4 collaborative team member.[42]  
5  
6

7  
8 Operational measures were addressed in five of the studies in this specialty, split into a  
9 number of outcomes pertaining to time [39,40,42-44] and to cost. [39,40]  
10  
11

12  
13 The evidence of the impact of PAs on access times was equivocal. One study reported how  
14 the wait to be seen by the orthopaedic service in the emergency department section of their  
15 orthopaedic pathway were significantly shortened (366 minutes versus 571 mins;  $p=0.0006$ )  
16 when PAs were substituted directly for doctors, although the authors attributed this to a  
17 combination of factors, and not just to the PAs, including more registered nurse cover,  
18 introduction of a family practice resident and other changing practices.[39] Another found the  
19 same when PAs were added to the team as part of larger trauma team re-organisation.[39]  
20  
21  
22  
23  
24  
25  
26  
27

28 Median number of weeks to wait for surgical procedures was also reported to be reduced  
29 from 44 to 30 weeks,[40] attributed by the authors to the use of two operating theatres by the  
30 surgeon, made possible by the PA preparing and finishing the case, similarly to the 30%  
31 increased throughput in the number of new patients in the pre-operative stage.[42]  
32  
33  
34  
35  
36

37 In terms of time, two studies [39,42] reported in detail on operating room times– set up,  
38 wound closure to out of theatre, average operating room time, and post surgery time.  
39  
40

41 Althausen et al[39] only noted a minimal (not statistically significant - (26.6 versus 24 mins;  
42  $p=0.0034$ ) difference for set up time in a direct comparison study, while Hepp[42] describes a  
43 39% reduction in time at this stage. PAs also released time for supervising physicians – 204  
44 hours per year ( $p$ =not reported)[40] or two hours a day,[42] and for general practitioners  
45 (GPs) (not quantified), who had previously acted as surgical assistants [40], Three high  
46 quality studies [39,43,44] reported variably on length of hospital stay, with one showing a  
47 significant reduction (three to four hours, a fraction of one day) for all patients when PAs  
48  
49  
50  
51  
52  
53  
54  
55  
56  
57  
58



1  
2  
3 were an addition to either the resident physician team (mean 4.32 days versus 4.62 days,  
4  $p=0.05$ ; and median 3.74 days versus 3.94 days,  $p=0.003$ ) or reorganised trauma panel  
5  
6 (mean 4.32 days versus 4.69 days,  $p=0.05$ ; and median 3.74 days versus 3.88 days,  $p=0.02$ )  
7  
8 [43] and two replacement studies finding no difference – when carrying out adjusted analyses  
9  
10 of one year against another[44] or when PAs were present or not.[39]  
11  
12

13  
14 Evidence regarding cost was again mixed. Bohm[40] suggests the actual costs of employment  
15  
16 for three PAs (between \$270,000 and \$327,000) were similar to those of the GPs they  
17  
18 replaced (\$270,226.88) in the operating room but argue an opportunity cost for others through  
19  
20 released time for the supervising physicians. However, a non-replacement model,  
21  
22 Althausen[39] reported specific cost savings in the ED (\$133.53 saving per patient, \$41,394  
23  
24 in one year) and operating room (\$3,207 saving) based on time reduction and PA charges  
25  
26 (taking account that only 50% of PA costs were covered through charges).  
27  
28

29  
30 As well as these operational measures, these studies also reported health outcomes, and all  
31  
32 reported no difference[41] or improvement in these.[39,43,44] Two considered the rate of  
33  
34 complication from procedures involving physician associates [37,41] and two reported on  
35  
36 mortality.[43,44] In terms of operating room complication rates[39] or the likelihood of  
37  
38 fracture malunion if the providers included a PA[41], these did not differ significantly from  
39  
40 those of other providers, but postoperative complications were reported to have decreased  
41  
42 (8.16 versus 12.83%,  $p=0.0034$ ) and antibiotic use (94.35 versus 91.47%,  $p=0.0302$ ) and  
43  
44 DVT prophylaxis (60.69 versus 53.96%,  $p=0.0084$ ) increased (statistically significantly) for  
45  
46 cases with a physician associate present (although it is noted that the tables in this paper  
47  
48 presented findings contradictory to the text and abstract).[39] One study assessing mortality  
49  
50 in two, year-long periods reported that involvement of PAs in the clinical team had no effect  
51  
52 on overall mortality rates[44] while another found that mortality decreased by approximately  
53  
54 one per cent with the introduction of PAs to a trauma panel (9.67% versus 12.21%, adjusted  
55  
56  
57  
58

1  
2  
3 OR=0.77 [CI 95% 0.55 to 0.99], p=0.13) and 1.5% to general surgery residents' teams  
4  
5 (9.03% versus 14.83%, adjusted OR=0.6 [CI 95% 0.41 to 0.80], p=0.003).[43] However, this  
6  
7 could not be directly attributable to the addition of the PA because contemporaneous  
8  
9 improvements in efficiency of the trauma service occurred.  
10  
11  
12  
13  
14  
15  
16  
17  
18  
19  
20

## 21 Acute internal medicine

22  
23  
24 The two studies considering PAs in acute internal medicine both examined resource use and  
25  
26 clinical outcomes[45,46] in replacement studies, one prospectively examining the impact of  
27  
28 PAs in place of interns/residents[46], the other retrospectively comparing outcomes where  
29  
30 PAs made up a greater or lesser proportion of the medical team staff, in place of  
31  
32 physicians.[45] Both studies measured length of stay, direct costs, and inpatient mortality for  
33  
34 patients with diagnoses of cerebrovascular accident, pneumonia, acute myocardial infarction  
35  
36 discharged alive, congestive heart failure and gastrointestinal haemorrhage[46] and those  
37  
38 with a principal medical (non-surgical, non-obstetrical) diagnosis code.[45]; the latter study  
39  
40 also measuring 30-day all cause readmission Neither study reported any significant  
41  
42 differences in length of stay between groups, with length of stay considered to be a proxy for  
43  
44 severity of illness. Cost in terms of relative value units (RVUs, based on billing information  
45  
46 for physician-ordered items, excluding administrative costs outside of the physician's  
47  
48 control) was also mostly similar although laboratory RVUs were lower for PAs, that is, they  
49  
50 ordered fewer investigations after adjustment for demographics in each diagnostic group (for  
51  
52 stroke, p = .015, pneumonia p = .003 and CHF p = .004). In each case PAs' RVUs were  
53  
54  
55  
56  
57  
58  
59  
60

1  
2  
3 lower than those of residents.[46] Similarly, Capstack et al[45] reported a statistically  
4 significantly lower mean patient charge for the expanded PA group (\$7822 versus \$7755 for  
5 the conventional PA group (3.52% lower [95% CI, 2.66% -4.39%]; p<0.001). Inpatient  
6 mortality was stated to be higher for the PA group in pneumonia care only[46], although the  
7 authors reported neither the percentage nor statistical values, and the larger study reported no  
8 significant differences in mortality or 30 day all-cause readmission.[45] The authors  
9 concluded that PAs used resources as effectively as, or more effectively than, residents[46] at  
10 the same time as providing similar clinical quality.[45]  
11  
12  
13  
14  
15  
16  
17  
18  
19  
20  
21  
22  
23

## 24 **DISCUSSION**

### 25 Principal findings

26  
27  
28  
29 This systematic review identified a large number of studies of PAs working in secondary care  
30 settings, internationally. However, once studies were excluded that did not meet the inclusion  
31 criteria, only 16 papers remained. Most of the included studies were from the emergency  
32 medicine and trauma and orthopaedics specialties, with two from acute internal medicine and  
33 one from mental health. We found no studies in our other specialty of interest – care of the  
34 elderly– where another larger grouping of PAs worked in the UK according to a national  
35 survey[18] at the time of planning this review. Several of the studies were of high quality,  
36 providing comparative data, and some contained statistical adjustments to address  
37 confounding; however all findings were observational. While we recognise that trials are  
38 rarely feasible in this type of workforce intervention, adjustment for confounding by  
39 indication is a serious challenge in this setting, especially when using a limited routine data  
40 source, and residual confounding from imperfect measures of severity[48] and bias from  
41 adjusting for co-variates that were not confounders[49] were likely. Quality also varied  
42  
43  
44  
45  
46  
47  
48  
49  
50  
51  
52  
53  
54  
55  
56  
57  
58

1  
2  
3 widely. This is noteworthy considering that this was a relatively recent set of papers. In  
4  
5 addition, comparison and synthesis has been limited by the mix in the papers of those who  
6  
7 measure outcomes where PAs are an addition to a team (presenting difficulties in attributing  
8  
9 the outcomes to PAs as opposed to any other increase in team capacity) and those where PAs  
10  
11 substitute for other physicians where the contribution of PAs themselves is actually being  
12  
13 measured. Although every paper reported the contribution of PAs in its  
14  
15 speciality/subspecialty as overall positive, it is important that the following summary of the  
16  
17 main findings of the review is considered in the context of the issues of method and  
18  
19 methodological quality.  
20  
21

22  
23 Results were spread across a number of outcomes, though those related to operational  
24  
25 measures - waiting times or times taken for treatment, as well as patient satisfaction - were  
26  
27 most prevalent. Outcomes reported when employing PAs in emergency medicine were  
28  
29 varied. Operational performance results reported were decreased waiting time and reduced  
30  
31 length of stay in the emergency department,[33] an increase in length of visit for those seen  
32  
33 by PAs[32] and reduced charges.[32] Health care outcomes reported were no difference in  
34  
35 72-hour revisits to the ED[36] or wound infection rate,[39] and differences which were  
36  
37 difficult to interpret, for example an increased prescription rate[34], or increase[37] or  
38  
39 decrease in analgesia prescribing.[35] The messages are remarkably similar for trauma and  
40  
41 orthopaedics. Operational measures highlighted no difference to [44] or reduced  
42  
43 [39,40,42,43] waiting times in the emergency, operative and post-operative phases of care;  
44  
45 released physician time[40,42] and reduced cost.[39] Here the evidence on health outcomes  
46  
47 was mostly positive – increased adherence to treatment processes such as antibiotic  
48  
49 administration[39], reduced post-operative complications[39], no difference in fracture  
50  
51 malunion[41]and either no difference[44] or a reduction[43] in mortality. High patient  
52  
53 satisfaction and staff acceptability, albeit with some caveats, were also reported.[40,42]  
54  
55  
56  
57  
58

1  
2  
3 The two studies in internal (acute) medicine were of high quality and were among the few  
4 replacing physicians with PAs. Both found no differences in clinical outcomes between PAs  
5 and residents, or in length of stay, although lower costs were reported.[45,46] In mental  
6 health, the one study's qualitative evidence points also to acceptability of the role through  
7 team cohesion and improvements in whole system working.[47]  
8  
9

10  
11  
12  
13  
14 Summarising across the specialties we have reported five studies where PAs were an addition  
15 to the team.[33,39,42,43,47] In these more patients are reported to have been treated; waiting,  
16 ED and operating room times are said to have been shorter and mortality to be lower;  
17 however assessment of the contribution of PAs as opposed to any increase in team capacity is  
18 limited. Eight studies which compared outcomes of care by PAs and physicians either when  
19 one or the other was providing care or when PAs were substituting overall for physicians  
20 [32,35,36,38,40,44,45,46] presented mixed results: either no or a very small difference to  
21 length of stay, reduced resource used but at equal or reduced cost, some time savings to  
22 senior physicians, lower analgesia prescribing, no difference in wound infection rate,  
23 inpatient mortality or re-attendance, or in acceptability to staff and patients. In three of the  
24 studies we do not know if the PAs were additions or substitutions but two reported higher  
25 prescribing by PAs.[34,37] and one no difference in negative outcomes from fracture.[41]  
26  
27  
28  
29  
30  
31  
32  
33  
34  
35  
36  
37  
38  
39  
40  
41  
42  
43

#### 44 Strengths and weaknesses

45  
46  
47 This review has systematically assessed the body of PA literature most immediately  
48 applicable to the current UK secondary care setting. We selected the five specialties in which  
49 PAs in the UK were mostly reported to be working[18] and therefore drew together the  
50 evidence of most relevance in that context and noted prominent gaps in evidence. However,  
51 this excluded evidence from other specialties. We excluded any studies including intensive  
52  
53  
54  
55  
56  
57  
58

1  
2  
3 care data as this overlapped with acute medicine in many abstracts and we could not  
4  
5 separately draw this out, and similarly we excluded studies with medical and surgical  
6  
7 specialties combined. We note that this literature appeared to include a greater proportion of  
8  
9 studies with stronger study designs, including prospective and randomised designs; in  
10  
11 particular we have excluded the recent matched controlled large studies from the Netherlands  
12  
13 in which several specialties – some within and some without our inclusion criteria - were  
14  
15 studied.[50,51]  
16

17  
18 All of the included papers were from North America, with the majority from the USA, where  
19  
20 health service organisation and the PA role may differ from that in other countries developing  
21  
22 the PA role. In the USA PAs can prescribe and order ionising radiation, and are, as a body,  
23  
24 more experienced than in countries more recently embracing this role.  
25  
26

27  
28 We planned to carry out meta-analysis as appropriate to the literature included. The diversity  
29  
30 of intervention as in initiation of PAs or change to PA practice being measured prevented  
31  
32 this, as did identifying the effect of PAs when there were other simultaneous changes, even  
33  
34 where a body of literature pertaining to a particular outcome measure, such as length of stay,  
35  
36 was included. Although narrative review is more limited in its precision, in following a  
37  
38 framework for this, we have aimed to provide a clear rationale for the synthesis and  
39  
40 conclusions we draw from it.  
41  
42  
43  
44  
45  
46

#### 47 Meaning of the study

48  
49  
50 This evidence is heavily weighted towards process times and patient satisfaction, with much  
51  
52 less on health outcomes, although outcomes are crucial to assess safety of practice for all  
53  
54 clinicians. Similar findings have been reported in a systematic review of new (non-medical)  
55  
56  
57  
58

1  
2  
3 roles in emergency medicine – reductions in waiting times in emergency departments, high  
4 level of patient satisfaction, confidence and acceptance of the roles. [52] Evidence also  
5 suggests that the perception of waiting times and satisfaction are correlated. [53]  
6  
7

8  
9  
10 Evidence from outside of the USA is very slim, as is evidence from multi-centre studies. The  
11 implications of this for policy can be seen in two ways.  
12  
13

14  
15 Firstly, the limitations to evidence could be considered a cause for some concern, particularly  
16 in light of exponential growth in training numbers for PAs in England (alongside other UK  
17 countries),[54] government support for increased numbers (in primary care at least)[10] and  
18 for recent consultation on the introduction of statutory regulation for PAs, alongside  
19 judgment by employers and workforce planners of the role's value, alongside other medical  
20 associate professions.[55,56] Numbers of PAs are also rising rapidly in the US.[4] That said,  
21 the evidence presented in this review is positive and likely supportive of the direction of  
22 travel in policy. In addition, the case for PAs in the UK secondary care setting is made on the  
23 stability they might offer to medical teams and their broad knowledge in the face of hyper-  
24 specialisation[57] and recently-acquired knowledge – although not covered in this review due  
25 to its inclusion of PAs from across multiple specialties - suggests that PAs in England work  
26 in teams of multiple medical and other clinical staff grades[58] and that they are seen  
27 primarily as a resource where there are significant medical staffing issues.[59] High quality,  
28 multi-centre matched controlled substitution evidence from the Netherlands, [50,51]  
29 reassuringly also offers similar evidence to that included in our review regarding no  
30 difference in a large number of inpatient and post-discharge clinical outcomes, alongside an  
31 increase in patient satisfaction. The study found no difference in total healthcare costs or  
32 Quality Adjusted Life Years, despite lower personnel costs. The authors conclude that PA  
33 substitution appeared safe. The studies included in this review can be seen as complex  
34 interventions in complex systems and yet this has not been considered in the conclusions the  
35  
36  
37  
38  
39  
40  
41  
42  
43  
44  
45  
46  
47  
48  
49  
50  
51  
52  
53  
54  
55  
56  
57  
58

1  
2  
3 authors draw. Well-controlled studies are needed to fill in the gaps in our knowledge about  
4  
5 the outcomes of PAs' contribution to the secondary care. More such evidence is required as  
6  
7 well as further evaluation from a realist perspective – considering context, mechanisms and  
8  
9 outcome - if PAs cannot be separated from service; measurement would utilise the principles  
10  
11 of realist complex intervention science[60] or process evaluation to “Clearly describe the  
12  
13 intervention and clarify causal assumptions (in relation to how it will be implemented, and  
14  
15 the mechanisms through which it will produce change, in a specific context).”[61]  
16  
17

## 18 Conclusion

20  
21 Modest research evidence exists on physician associates working in emergency medicine,  
22  
23 trauma and orthopaedics. acute internal medicine; very limited evidence in mental health and  
24  
25 none meeting our criteria in care of the elderly. The focus of the research is mainly on  
26  
27 organisational and financial implications because increasing throughput of patients, whilst  
28  
29 containing costs and without adversely affecting outcomes is fundamental to the rationale for  
30  
31 the PA role. Evidence shows that use of PAs can achieve this objective. The PAs worked as  
32  
33 additions as well as substitutes in complex systems where work is organised in teams which  
34  
35 creates challenges for identifying cause and effect. Physician associate employment is also  
36  
37 often part of wider service re-design or staffing changes in response to other changes, for  
38  
39 example, availability of medical staff. The evidence here suggests that PAs can make a  
40  
41 positive contribution to medical care and medical teams. Further research to the standard of  
42  
43 more recent publications, is needed to elucidate the impact of PAs in different specialty areas,  
44  
45 including comparators, and reporting on more than one setting, including countries in which  
46  
47 the PA role is expanding rapidly. .  
48  
49  
50  
51  
52  
53  
54  
55  
56  
57  
58



## COMPETING INTERESTS

SdeL: University of Surrey runs a Physician Associate course.

- JP: chairs the UK and Ireland Board for Physician Associate Education and is director of the Physician Associate programme at the University of Birmingham.

## FUNDING AND DISCLAIMER

This project was funded by the National Institute for Health Research Health Services and Delivery Research Programme (project number 14/19/26).

The views and opinions expressed herein are those of the authors and do not necessarily reflect those of the HS&DR Programme, NIHR, NHS or the Department of Health.

## DATA SHARING STATEMENT

No further data are available

## CONTRIBUTOR STATEMENT

MH led the design, execution and writing of this paper, under the direction of the study's PI VMD and supported by discussion with and written feedback from all co-authors' (CW, FP, HG, SdeL, JP, RG, JG, LN) on the design of the review and interpretation of findings. In addition, MH, CW, FP and VMD searched for literature and carried out data extraction and quality assessment. All authors (CW, FP, HG, SdeL, JP, RG, JG, LN, VMD) contributed intellectual content to the paper.

1  
2  
3  
4  
5  
6 **TABLES AND FIGURES:**

7  
8 Figure 1: 'Risk of bias' graph: review authors' judgements about each risk of bias item  
9  
10 presented as percentages across all included studies

11  
12 Figure 2: PRISMA flow chart

13  
14 Supplementary file 1: Scoping review (Preliminary Medline search strategy – 24/11/2015)  
15  
16 and MeSH (Medical Subject Headings) definition of search terms used  
17  
18  
19  
20  
21  
22  
23  
24  
25  
26  
27  
28  
29  
30  
31  
32  
33  
34  
35  
36  
37  
38  
39  
40  
41  
42  
43  
44  
45  
46  
47  
48  
49  
50  
51  
52  
53  
54  
55  
56  
57  
58  
59  
60

**REFERENCES**

1. World Health Organisation Global strategy on human resources for health: Workforce 2030. Draft (2015) Accessed last 12-09-2016  
[http://www.who.int/hrh/resources/pub\\_globstrathrh-2030/en/](http://www.who.int/hrh/resources/pub_globstrathrh-2030/en/)
2. World Health Organisation. Task shifting: rational redistribution of tasks among health workforce teams - global recommendations and guidelines. Geneva: World Health Organisation; 2008.
3. Mittman DE, Cawley JF, Fenn WH. Physician assistants in the United States. *BMJ* 2002;325:485-487.
4. NCCPA. 2016 Statistical Profile of Certified Physician Assistants an Annual report of the National Commission on Certification of Physician Assistants. 2017 NCCPA. Accessed January 25 2018 at  
<https://prodcmsstoragesa.blob.core.windows.net/uploads/files/2016StatisticalProfileofCertifiedPhysicianAssistants.pdf>
5. AAPA. What is a PA? Accessed March 22 2017 at <https://www.aapa.org/what-is-a-pa/>
6. Hooker RS, Hogan K, Leeker E. The globalization of the physician assistant profession. *J Physician Assist Educ* 2007;18:76–85.
7. Health Education England. HEE Business Plan 2015/16. 201515. Accessed 02-09-2016 <https://hee.nhs.uk/sites/default/files/documents/HEE-Business-Plan-2015-16.pdf>

- 1  
2  
3 8. Healthforce Ontario 2009 Ontario's Physician Assistant Initiative: An Overview.  
4  
5 Accessed on 13-09-2016 at  
6  
7 [http://www.healthforceontario.ca/en/M4/Ontario%27s\\_Physician\\_Assistant\\_Initiative](http://www.healthforceontario.ca/en/M4/Ontario%27s_Physician_Assistant_Initiative)  
8  
9
- 10 9. Synergia Limited. 2015. Phase II of the Physician Assistant Demonstrations  
11  
12 Evaluation Report: Report for Health Workforce New Zealand. Wellington: Ministry  
13  
14 of Health. Accessed last 2-9-2016 at [http://www.health.govt.nz/publication/phase-ii-](http://www.health.govt.nz/publication/phase-ii-physician-assistant-demonstrations-evaluation-report)  
15  
16 [physician-assistant-demonstrations-evaluation-report](http://www.health.govt.nz/publication/phase-ii-physician-assistant-demonstrations-evaluation-report)  
17  
18
- 19 10. Department of Health and The Rt Hon Jeremy Hunt MP. New Deal for General  
20  
21 Practice, <https://www.gov.uk/government/speeches/new-deal-for-general-practice>  
22  
23 (2015, accessed 25th January 2018).  
24  
25
- 26 11. Drennan V, Halter M, Brearley S et al. Investigating the contribution of physician  
27  
28 assistants to primary care in England: a mixed-methods study. *Health Services and*  
29  
30 *Delivery Research* 2014;2.  
31  
32
- 33 12. Velde FVD, Windt WVD. Alumni van de masteropleiding Physician Assistant.  
34  
35 Utrecht: Kiwa Prismant; 2013. Cited in Timmermans MJ, van Vught AJ, Wensing M,  
36  
37 Laurant MG. The effectiveness of substitution of hospital ward care from medical  
38  
39 doctors to physician assistants: a study protocol. *BMC Health Serv Res* 2014;14:43.  
40  
41 doi: 10.1186/1472-6963-14-43.  
42  
43
- 44 13. Ritsema T. Faculty of Physician Associates Census results 2017. Royal College of  
45  
46 Physicians Faculty of Physician Associates. Accessed 25<sup>th</sup> January 2018 at  
47  
48 <http://www.fparcp.co.uk/about-fpa/fpa-census>  
49  
50  
51  
52  
53  
54  
55  
56  
57  
58

14. Hooker RS, Everett CM. The contributions of physician assistants in primary care systems. *Health Soc Care Community* 2012;20–31.
15. Halter M, Drennan V, Chattopadhyay K, et al. The contribution of physician assistants in primary care: a systematic review. *BMC Health Serv Res* 2013;18:223. doi: 10.1186/1472-6963-13-223.
16. Doan Q, Sabhaney V, Kissoon N, et al. A systematic review: the role and impact of the physician assistant in the emergency department. *Emerg Med Australas* 2011;23:7-15.
17. Johal J, Dodd A. Physician extenders on surgical services: a systematic review. *Can J Surg.* 2017;;60:172-178.
18. Ritsema TS. Faculty of Physician Associates Census Results 2016. Accessed 10 September 2017 at <http://www.fparcp.co.uk/about-fpa/fpa-census>
19. Merkle F, Ritsema TS, Bauer S, Kuilman L. The physician assistant: Shifting the Paradigm of European medical practice? *HSR Proc Intensive Care Cardiovasc Anesth* 2011;3:255-262.
20. Moher D, Liberati A, Tetzlaff J et al. The PRISMA Group. Preferred reporting items for systematic reviews and meta-analyses: the PRISMA statement. *J Clin Epidemiol* 2009;62:1006–12.
21. Halter M, Wheeler C, Drennan V, et al. Evidence of impact of physician associates in secondary care: a systematic mixed studies review. PROSPERO 2016:CRD42016032895. Accessed on 10 September 2017 [http://www.crd.york.ac.uk/PROSPERO/display\\_record.asp?ID=CRD42016032895](http://www.crd.york.ac.uk/PROSPERO/display_record.asp?ID=CRD42016032895).

- 1  
2  
3 22. Greenhalgh T, Peacock R. Effectiveness and efficiency of search methods in  
4  
5 systematic reviews of complex evidence: audit of primary sources. *BMJ* 2005;  
6  
7 331:1064–1065
- 8  
9 23. Department of Health. The Competence and Curriculum Framework for the Physician  
10  
11 Assistant. London: Department of Health 2006.
- 12  
13 24. Maxwell R. Dimensions of quality revisited: from thought to action. *Qual Health*  
14  
15 *Care* 1992;1:171-177.
- 16  
17 25. International Monetary Fund. Table B1. Advanced Economies: Unemployment,  
18  
19 Employment, and Real GDP per Capita.  
20  
21 <https://www.imf.org/external/pubs/ft/weo/2015/01/pdf/tblpartb.pdf> Accessed on 14  
22  
23 December 2015.
- 24  
25 26. Kmet LM, Lee RC, Cook LS. Standard quality assessment criteria for evaluating  
26  
27 primary research papers from a variety of fields. *Alberta Herit Found Med Res*  
28  
29 2004;13:1–11. <http://files.deslibris.ca/cppc/200/200548.pdf> Accessed November 24  
30  
31 2015.
- 32  
33 27. Pace R, Pluye P, Bartlett G, et al. Testing the reliability and efficiency of the pilot  
34  
35 Mixed Methods Appraisal Tool (MMAT) for systematic mixed studies review. *Int. J.*  
36  
37 *Nurs. Stud.* (2011), doi:10.1016/j.ijnurstu.2011.07.002
- 38  
39 28. Centre for Reviews and Dissemination, University of York. Systematic Reviews.  
40  
41 CRD's guidance for undertaking reviews in healthcare. 2009.
- 42  
43 29. Thomas J, Harden A: Methods for the thematic synthesis of qualitative research in  
44  
45 systematic reviews. *BMC Med Res Meth* 2008;8:45.
- 46  
47 30. Popay J, Roberts H, Sowden A, et al. Guidance on the conduct of narrative synthesis  
48  
49 in systematic reviews. ESRC Research Methods Programme. 2006.
- 50  
51  
52  
53  
54  
55  
56  
57  
58

- 1  
2  
3 31. Noyes J & Lewin S. Chapter 6: Supplemental Guidance on Selecting a Method of  
4 Qualitative Evidence Synthesis, and Integrating Qualitative Evidence with Cochrane  
5 Intervention Reviews. In: Noyes J, Booth A, Hannes K, et al (editors), Supplementary  
6 Guidance for Inclusion of Qualitative Research in Cochrane Systematic Reviews of  
7 Interventions. Version 1 (updated August 2011). Cochrane Collaboration Qualitative  
8 Methods Group, 2011. Available from URL [http://cqrng.cochrane.org/supplemental-](http://cqrng.cochrane.org/supplemental-handbook-guidance)  
9 [handbook-guidance](http://cqrng.cochrane.org/supplemental-handbook-guidance) Last accessed January 2015.  
10  
11  
12  
13  
14  
15  
16  
17  
18 32. Arnopolin SL, Smithline HA. Patient care by physician assistants and by physicians in  
19 an emergency department. *JAAPA* 2000;13:39-40, 49-50, 53-4 passim.  
20  
21  
22 33. Ducharme J, Alder RJ, Pelletier C, et al. The impact on patient flow after the  
23 integration of nurse practitioners and physician assistants in 6 Ontario emergency  
24 departments. *CJEM*. 2009;11:455-461.  
25  
26  
27  
28  
29 34. Hooker RS, Cipher DJ, Cawley JF, et al. Emergency medicine services:  
30 Interprofessional care trends. *J Interprof Care* 2009;22: 167-178.  
31  
32  
33 35. Kozlowski MJ, Wiater JG, Pasqual RG, et al. Painful discrimination: The differential  
34 use of analgesia in isolated lower limb injuries. *Am J Emerg Med*.2002;20:502-5.  
35  
36  
37 36. Pavlick D, Sacchetti A, Seymour A, et al. Physician assistant management of pediatric  
38 patients in a general community emergency department: A real-world analysis.  
39 *Pediatr Emerg Care* 2017;33:26-30.  
40  
41  
42  
43  
44 37. Ritsema TS, Kelen GD, Pronovost PJ, et al. The National Trend in Quality of  
45 Emergency Department Pain Management for Long Bone Fractures. *Acad Emerg*  
46 *Med* 2007;14:163-9.  
47  
48  
49  
50 38. Singer AJ, Hollander JE, Cassara G, et al. Level of training, wound care practices, and  
51 infection rates. *Am J Emerg Med* 1995;13:265-8.  
52  
53  
54  
55  
56  
57  
58

- 1  
2  
3 39. Althausen PL, Shannon S, Owens B, et al. Impact of hospital-employed physician  
4 assistants on a level II community-based orthopaedic trauma system. *J Orthop*  
5 *Trauma*. 2013;27:e87-91. doi: 10.1097/BOT.0b013e3182647f29.  
6  
7  
8  
9 40. Bohm ER, Dunbar M, Pitman D, et al. Experience with physician assistants in a  
10 Canadian arthroplasty program. *Can J Sur*. 2010;53:103-8.  
11  
12 41. Garrison S, Eismann EA, Cornwall R. Does using PAs in the closed treatment of  
13 pediatric forearm fractures increase malunion risk? *JAAPA* 2017;30:41-45.  
14  
15 42. Hepp SL, Suter E, Nagy D, et al. Utilizing the physician assistant role: case study in  
16 an upper-extremity orthopedic surgical program. *Can J Surg* 60:115-121.  
17  
18 43. Mains C Scarborough K, Baror R, et al. Staff commitment to trauma care improves  
19 mortality and length of stay at a level I trauma center. *J Trauma* 2009;66:1315-20.  
20  
21 doi: 10.1097/TA.0b013e31819d96d8.  
22  
23 44. Oswanski MF, Sharma OP, Raj SS. Comparative review of use of physician assistants  
24 in a level I trauma center. *Am Surg* 2004;Mar;70:272-9.  
25  
26 45. Capstack TM, Seguija C, Vollono LM, et al. A comparison of conventional and  
27 expanded physician assistant hospitalist staffing models at a community hospital. *J*  
28 *Clin Outcomes*. 2016 23: 455-461.  
29  
30 46. Van Rhee J, Ritchie J, Eward A. Resource use by physician assistant services versus  
31 teaching services *JAAPA* 2002;15:33-8,40,42.cheon  
32  
33 47. McCutchen B, Patel S, Copeland D. Expanding the role of PAs in the treatment of  
34 severe and persistent mental illness. *JAAPA* 2017;30:36-37.  
35  
36 48. Greenland S, Robins JM, Pearl J. Confounding and collapsibility in causal inference.  
37 *Statistical Science* 14:29-46.  
38  
39 [http://www.biostat.harvard.edu/robins/publications/Confounding\\_and\\_collapsibility.p](http://www.biostat.harvard.edu/robins/publications/Confounding_and_collapsibility.pdf)  
40 [df](http://www.biostat.harvard.edu/robins/publications/Confounding_and_collapsibility.pdf)] Accessed March 30th 2017.  
41  
42  
43  
44  
45  
46  
47  
48  
49  
50  
51  
52  
53  
54  
55  
56  
57  
58  
59  
60



- 1  
2  
3 49. Greenland S, Pearl J, Robins JM. Causal diagrams for epidemiological research.  
4  
5 *Epidemiology* 1999;10:37-48.  
6  
7 <http://www.biostat.harvard.edu/robins/publications/causaldia.pdf>] Accessed March  
8  
9 30th 2017.  
10  
11 50. Timmermans MJC, van Vught AJAH, Peters YAS, et al. The impact of the  
12 implementation of physician assistants in inpatient care: A multicenter matched-  
13 controlled study. *PLoS ONE* 2017;12:e0178212..  
14  
15 51. Timmermans MJC, van den Brink GT, van Vught AJAH, et al. The involvement of  
16 physician assistants in inpatient care in hospitals in the Netherlands: a cost-  
17 effectiveness analysis. *BMJ Open*. 2017;7:e016405. doi: 10.1136/bmjopen-2017-  
18 016405.  
19  
20 52. Hoskins R. Evaluating new roles within emergency care: a literature review. *Int*  
21 *Emerg Nurs* 2011;19):125-40. doi: 10.1016/j.ienj.2010.09.003.  
22  
23 53. Saxon K, London K, Bacharouch A, et al. Patients' Perceptions of Waiting Times and  
24 the Effect on Patient Satisfaction in the Emergency Department. *Ann Emer Med*  
25 2013;62,4 Supplement:S82  
26  
27 54. Health Education England. Medical Associate Professionals.  
28 [https://hee.nhs.uk/printpdf/our-work/developing-our-workforce/medical-associate-](https://hee.nhs.uk/printpdf/our-work/developing-our-workforce/medical-associate-professions)  
29 [professions](https://hee.nhs.uk/printpdf/our-work/developing-our-workforce/medical-associate-professions). Accessed 7 February 2017.  
30  
31 55. Department of Health and Social Care. The regulation of medical associate  
32 professions in the UK Closed consultation. Accessed 25<sup>th</sup> January 2018 at  
33 [https://www.gov.uk/government/consultations/regulating-medical-associate-](https://www.gov.uk/government/consultations/regulating-medical-associate-professions-in-the-uk)  
34 [professions-in-the-uk](https://www.gov.uk/government/consultations/regulating-medical-associate-professions-in-the-uk)  
35  
36 56. Department of Health The regulation of medical associate professions in the UK  
37 Consultation document, 2017. Accessed 25<sup>th</sup> January 2018 at  
38 [https://www.gov.uk/government/uploads/system/uploads/attachment\\_data/file/650554](https://www.gov.uk/government/uploads/system/uploads/attachment_data/file/650554/The_regulation_of_MAPs_in_the_UK.pdf)  
39 [/The\\_regulation\\_of\\_MAPs\\_in\\_the\\_UK.pdf](https://www.gov.uk/government/uploads/system/uploads/attachment_data/file/650554/The_regulation_of_MAPs_in_the_UK.pdf)  
40  
41  
42  
43  
44  
45  
46  
47  
48  
49  
50  
51  
52  
53  
54  
55  
56  
57  
58  
59  
60

- 1  
2  
3 57. Ross N, Parle J, Begg P et al. The case for the physician assistant. *Clinical Medicine*  
4  
5 2012;12:200–6.  
6  
7 58. Wheeler C, Halter M, Drennan VM, et al. Physician associates working in secondary  
8  
9 care teams in England: Interprofessional implications from a national survey. *J*  
10  
11 *Interprof Care* 2017;6:1-3. doi: 10.1080/13561820.2017.1341390.  
12  
13 59. Halter M, Wheeler C, Drennan V, et al. Physician Associates in England's hospitals: a  
14  
15 survey of medical directors exploring current usage and supporting/inhibiting factors  
16  
17 to their recruitment. *Clin Med* 2017;17:126-131. doi: 10.7861/clinmedicine.17-2-126.  
18  
19  
20  
21  
22 60. Fletcher A, Jamal F, Moore G, et al. Realist complex intervention science: Applying  
23  
24 realist principles across all phases of the Medical Research Council framework for  
25  
26 developing and evaluating complex interventions. *Evaluation* 2016;22:286-303  
27  
28  
29 61. Moore GF, Audrey S, Barker M, et al. Process evaluation of complex interventions:  
30  
31 Medical Research Council guidance. *BMJ* 2015;350:p.h1258.  
32  
33  
34  
35  
36  
37  
38  
39  
40  
41  
42  
43  
44  
45  
46  
47  
48  
49  
50  
51  
52  
53  
54  
55  
56  
57  
58  
59  
60

1  
2  
3  
4  
5  
6  
7  
8  
9  
10  
11  
12  
13  
14  
15  
16  
17  
18  
19  
20  
21  
22  
23  
24  
25  
26  
27  
28  
29  
30  
31  
32  
33  
34  
35  
36  
37  
38  
39  
40  
41  
42  
43  
44  
45  
46  
47  
48  
49  
50  
51  
52  
53  
54  
55  
56  
57  
58  
59  
60

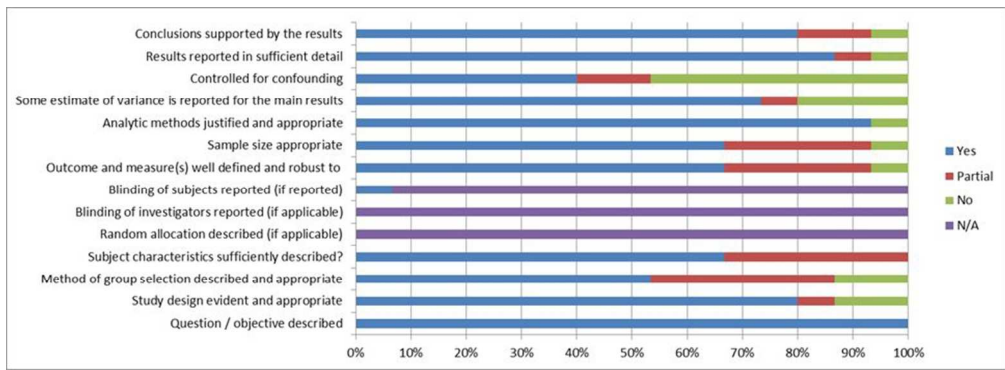

Study selection

81x29mm (300 x 300 DPI)

Peer review only

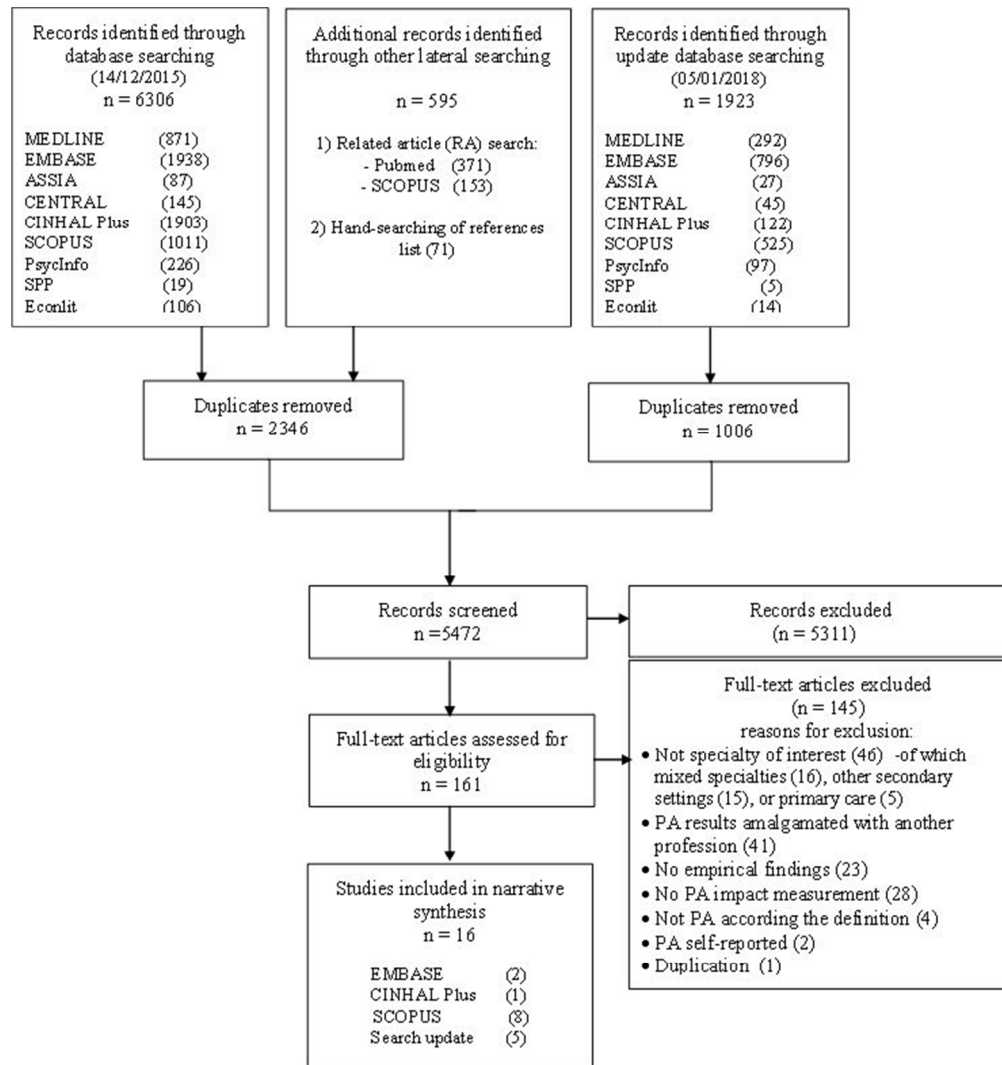

Quality assessment

62x66mm (300 x 300 DPI)

1  
2  
3  
4  
5  
6  
7  
8  
9  
10  
11  
12  
13  
14  
15  
16  
17  
18  
19  
20  
21  
22  
23  
24  
25  
26  
27  
28  
29  
30  
31  
32  
33  
34  
35  
36  
37  
38  
39  
40  
41  
42  
43  
44  
45  
46  
47

**SUPPLEMENTARY FILE 1: Scoping review (Preliminary Medline search strategy – 24/11/2015)**

| #  | Concept                       | Search Terms                                                                                                                                                  | Results |
|----|-------------------------------|---------------------------------------------------------------------------------------------------------------------------------------------------------------|---------|
| 1  |                               | exp Physician Assistants/                                                                                                                                     | 2410    |
| 2  |                               | exp Pediatric Assistants/                                                                                                                                     | 26      |
| 3  |                               | Physician Assistant\$.tw.                                                                                                                                     | 1498    |
| 4  |                               | Feldsher\$.tw.                                                                                                                                                | 17      |
| 5  |                               | Clinical Officer\$.tw.                                                                                                                                        | 135     |
| 6  | <b>Physician Associates</b>   | Paramedical Practitioner&.tw.                                                                                                                                 | 0       |
| 7  |                               | Medical Assistant\$.tw.                                                                                                                                       | 324     |
| 8  |                               | Allied Health Personnel.tw.                                                                                                                                   | 48      |
| 9  |                               | physician associate\$.tw.                                                                                                                                     | 37      |
| 10 |                               | (mid level adj3 provider\$.tw.                                                                                                                                | 124     |
| 11 |                               | ((assistant* or technician* or officer* or associate\$) adj2 (physician\$ or surgical or clinical\$ or practitioner\$ or medical\$ or provider\$)).tw.        | 24985   |
| 12 |                               | exp Emergency Medicine/ and (speciali?ed or specialty or hospital\$ or secondary or care or medicine).tw.                                                     | 4983    |
| 13 | <b>Emergency Medicine</b>     | ((accident and emergency) or A&E department or emergency department or casualty or emergency Medicine).tw.                                                    | 47842   |
| 14 |                               | (emergency adj3 (medic* or servic* or ward* or department)).tw.                                                                                               | 54262   |
| 15 |                               | (exp critical care/ or exp intensive care/) and (speciali?ed or specialty or hospital\$ or secondary or care or medicine).tw.                                 | 23791   |
| 16 |                               | ((intensive adj3 care) and (speciali?ed or specialty or hospital\$ or secondary or care or medicine)).tw.                                                     | 71552   |
| 17 |                               | exp Internal Medicine/ and (speciali?ed or specialty or hospital\$ or secondary or care or medicine).tw.                                                      | 16968   |
| 18 | <b>Secondary Care</b>         | (internal medicine and (speciali?ed or specialty or hospital\$ or secondary or care or medicine)).tw.                                                         | 10752   |
| 19 |                               | (Acute Medicine or acute internal medicine or acute medical unit\$ or medical assessment unit\$ or acute ward\$).tw.                                          | 690     |
| 20 | <b>Trauma or Orthopaedics</b> | (exp Orthopedics/ or exp Traumatology/) and (speciali?ed or specialty or hospital\$ or secondary or care or medicine).tw.                                     | 3015    |
| 21 |                               | ((Trauma or Orthop?dic\$) adj3 (speciali?ed or specialty or hospital\$ or secondary or care or medicine)).tw.                                                 | 7280    |
| 22 |                               | (Orthop?dic surgery or trauma surgery).tw.                                                                                                                    | 4466    |
| 23 |                               | ((bone\$ or joint\$ or ligament\$ or tendon\$ or muscle\$ or nerve\$) adj3 (operation\$ or surgery or replacement\$)).tw.                                     | 13668   |
| 24 | <b>Care of the Elderly</b>    | (exp geriatrics/ or Aging/ or exp Aged/ or older people.mp. or exp Frail Elderly/) and (speciali?ed or specialty or hospital\$ or secondary or care).tw.      | 361294  |
| 25 |                               | ((Older adult or Aged or elderly or geriatric* or older people* or ag?ng) adj3 (speciali?ed or specialty or hospital\$ or secondary or care or medicine)).tw. | 15561   |

|    |    |                                                                                                                                          |        |
|----|----|------------------------------------------------------------------------------------------------------------------------------------------|--------|
| 1  |    |                                                                                                                                          |        |
| 2  |    |                                                                                                                                          |        |
| 3  |    |                                                                                                                                          |        |
| 4  |    |                                                                                                                                          |        |
| 5  | 26 | or/12-25                                                                                                                                 | 508965 |
| 6  | 27 | exp Primary Health Care/ or exp preventive medicine/ or exp physicians, Primary Care/                                                    | 75166  |
| 7  | 28 | (primary care or primary healthcare or primary health care or primary health service\$.tw.                                               | 68593  |
| 8  | 29 | 27 or 28                                                                                                                                 | 111510 |
| 9  | 30 | <b>Primary</b> exp Family Practice/ or exp Physicians, Family/ or exp General Practitioners/ or exp General Practice/                    | 47498  |
| 10 | 31 | <b>care</b> (family practice\$ or family practitioner\$ or family physician\$ family medicine\$ or General practice\$ or General         | 47129  |
| 11 |    | practitioner\$ or GPs).tw.                                                                                                               |        |
| 12 | 32 | 30 or 31                                                                                                                                 | 72038  |
| 13 | 33 | 29 not 32                                                                                                                                | 91680  |
| 14 | 34 | <b>Outpatie</b> (exp Outpatients/ or Outpatient Clinics, Hospital/ or ambulatory care/) and (speciali?ed or specialty or hospital\$ or   | 18427  |
| 15 |    | <b>nt and</b> secondary or care or medicine).tw.                                                                                         |        |
| 16 | 35 | <b>inpatient</b> (exp Inpatients/ or Hospitalization/) and (speciali?ed or specialty or hospital\$ or secondary or care or medicine).tw. | 49797  |
| 17 | 36 | <b>care</b> (ambulatory care or ambulatory emergency care).tw.                                                                           | 3948   |
| 18 | 37 | ((outpatient\$ or out-patient\$) adj3 (speciali?ed or specialty or hospital\$ or secondary or care or medicine)).tw.                     | 11455  |
| 19 | 38 | ((inpatient\$ or in-patient\$) adj3 (speciali?ed or specialty or hospital\$ or secondary or care or medicine)).tw.                       | 24157  |
| 20 | 39 | Treatment Outcome/ or "Outcome and Process Assessment (Health Care)"/ or "Outcome Assessment (Health                                     | 769470 |
| 21 |    | Care)"/ or Medical Audit/ or Program Evaluation/                                                                                         |        |
| 22 | 40 | exp Patient Readmission/ or exp Length of Stay/ or exp Clinical Audit/ or exp Medical Audit/                                             | 68267  |
| 23 | 41 | Health Planning/ and (organi?ation* or system* or hospital* or Physician* or workforce or staff or                                       | 2686   |
| 24 |    | professional*).tw.                                                                                                                       |        |
| 25 | 42 | Efficiency, Organizational/ and (organi?ation* or system* or hospital* or Physician* or workforce or staff or                            | 8952   |
| 26 |    | professional*).tw.                                                                                                                       |        |
| 27 | 43 | Resource Allocation/ and (organi?ation* or system* or hospital* or Physician* or workforce or staff or                                   | 1377   |
| 28 |    | professional*).tw.                                                                                                                       |        |
| 29 | 44 | <b>Impact</b> Health Personnel/ and (organi?ation* or system* or hospital* or Physician* or workforce or staff or                        | 11958  |
| 30 |    | professional*).tw.                                                                                                                       |        |
| 31 | 45 | Health Manpower/ and (organi?ation* or system* or hospital* or Physician* or workforce or staff or                                       | 2123   |
| 32 |    | professional*).tw.                                                                                                                       |        |
| 33 | 46 | Medical Staff/ and (organi?ation* or system* or hospital* or Physician* or workforce or staff or professional*).tw.                      | 899    |
| 34 | 47 | Delivery of Health Care/ and (productivity or efficiency or performance or guideline* or quality).tw.                                    | 8411   |
| 35 | 48 | ((equity or difference\$ disparit\$ or inequalit\$ or inequit\$) adj5 (experience\$ or perception\$ or view\$ or rates or                | 2048   |
| 36 |    | rating or review or audit or impact or influence or effect or outcome or performance or quality)).tw.                                    |        |
| 37 |    | ((Acceptability or compassion or dignity or satisfaction or dissatisfaction) adj5 (experience\$ or perception\$ or                       |        |
| 38 | 49 | view\$ or rates or rating or review or audit or impact or influence or effect or outcome or performance or                               | 16604  |
| 39 |    | quality)).tw.                                                                                                                            |        |
| 40 |    |                                                                                                                                          |        |
| 41 |    |                                                                                                                                          |        |
| 42 |    |                                                                                                                                          |        |
| 43 |    |                                                                                                                                          |        |
| 44 |    |                                                                                                                                          |        |
| 45 |    |                                                                                                                                          |        |
| 46 |    |                                                                                                                                          |        |
| 47 |    |                                                                                                                                          |        |

1  
2  
3  
4  
5  
6  
7  
8  
9  
10  
11  
12  
13  
14  
15  
16  
17  
18  
19  
20  
21  
22  
23  
24  
25  
26  
27  
28  
29  
30  
31  
32  
33  
34  
35  
36  
37  
38  
39  
40  
41  
42  
43  
44  
45  
46  
47

50  
51  
52  
53  
54  
55  
56  
57  
58  
59  
60

**Impact in  
Secondary Care  
of Physician  
Associates**

|                                                                                                                                                                                                                          |        |
|--------------------------------------------------------------------------------------------------------------------------------------------------------------------------------------------------------------------------|--------|
| ((Efficiency or productivity or economic\$ or benefit) adj5 (experience\$ or perception\$ or view\$ or rates or rating or review or audit or impact or influence or effect or outcome or performance or quality)).tw.    | 34565  |
| ((Effectiveness or efficacy or effectivity or capability) adj5 (experience\$ or perception\$ or view\$ or rates or rating or review or audit or impact or influence or effect or outcome or performance or quality)).tw. | 35758  |
| ((Effectiveness or efficacy or effectivity or capability) adj5 (experience\$ or perception\$ or view\$ or rates or rating or review or audit or impact or influence or effect or outcome or performance or quality)).tw. | 35758  |
| ((Access\$ or responsiveness or timely or timeliness) adj5 (experience\$ or perception\$ or view\$ or rates or rating or review or audit or impact or influence or effect or outcome or performance or quality)).tw.     | 16251  |
| ((Appropriate\$ or relevance or relevant) adj5 (experience\$ or perception\$ or view\$ or rates or rating or review or audit or impact or influence or effect or outcome or performance or quality)).tw.                 | 32405  |
| ((Cost\$ or afford\$ value for money or financ\$) adj5 (experience\$ or perception\$ or view\$ or rates or rating or review or audit or impact or influence or effect or outcome or performance or quality)).tw.         | 33373  |
| or/1-11                                                                                                                                                                                                                  | 26515  |
| 26 or 33 or 34 or 35 or 36 or 37 or 38                                                                                                                                                                                   | 621770 |
| or/39-55                                                                                                                                                                                                                 | 959419 |
| 56 and 57 and 58                                                                                                                                                                                                         | 1575   |
| limit 59 to (english language and last 20 years)                                                                                                                                                                         | 1513   |

PA-SCer systematic review narrative synthesis: first draft T&O and internal med 160806

1  
2  
3  
4 **SUPPLEMENTARY FILE 1 continued: MeSH --Medical Subject Headings definition of search**  
5 **terms used**

6  
7  
8 (alphabetical [US spellings])  
9

10 <http://www.ncbi.nlm.nih.gov/mesh>  
11

12  
13 **Aged:** A person 65 through 79 years of age. For a person older than 79 years, AGED, 80 AND OVER  
14 is available. Year introduced: 1966. By exploding this term, we do include MeSH terms found below  
15 it in the MeSH hierarchy as follows: Aged, 80 and over; Frail Elderly.  
16  
17

18 **Ageing:** The gradual irreversible changes in structure and function of an organism that occur as a result  
19 of the passage of time. By exploding this term, we do include MeSH terms found below it in the  
20 MeSH hierarchy as follows: Longevity.  
21  
22

23 **Ambulatory care:** Health care services provided to patients on an ambulatory basis, rather than by  
24 admission to a hospital or other health care facility. The services may be a part of a hospital,  
25 augmenting its inpatient services, or may be provided at a free-standing facility. Year introduced:  
26 1968(1966)  
27  
28  
29

30 **Behavioral Disciplines and Activities:** The specialties in psychiatry and psychology, their diagnostic  
31 techniques and tests, their therapeutic methods, and psychiatric and psychological services. Year  
32 introduced: 1998  
33  
34  
35

36 **Clinical Audit:** A detailed review and evaluation of selected clinical records by qualified professional  
37 personnel to improve the quality of patient care and outcomes. The clinical audit was formally  
38 introduced in 1993 into the United Kingdom's National Health Service. Year introduced: 2008  
39  
40

41 **Critical Care:** Health care provided to a critically ill patient during a medical emergency or crisis.  
42 Year introduced: 1975  
43  
44

45 **Emergency medicine:** The branch of medicine concerned with the evaluation and initial treatment of  
46 urgent and emergent medical problems, such as those caused by accidents, trauma, sudden illness,  
47 poisoning, or disasters. Emergency medical care can be provided at the hospital or at sites outside the  
48 medical facility.  
49  
50

51 **Family Practice:** A medical specialty concerned with the provision of continuing, comprehensive  
52 primary health care for the entire family.  
53  
54  
55



PA-SCer systematic review narrative synthesis: first draft T&O and internal med 160806

1  
2  
3 **Frail Elderly:** Older adults or aged individuals who are lacking in general strength and are unusually  
4 susceptible to disease or to other infirmity. Year introduced: 1991  
5

6 **General Practice:** Patient-based medical care provided across age and gender or specialty  
7 boundaries. Year introduced: 2011  
8  
9

10 **General Practitioners:** Physicians whose practice is not restricted to a specific field of medicine  
11

12 **Geriatrics:** The branch of medicine concerned with the physiological and pathological aspects of the  
13 aged, including the clinical problems of senescence and senility.  
14  
15

16 **Hospitalization:** The confinement of a patient in a hospital.  
17

18 **Inpatients:** Persons admitted to health facilities which provide board and room, for the purpose of  
19 observation, care, diagnosis or treatment.  
20  
21

22 **Intensive care:** Advanced and highly specialized care provided to medical or surgical patients whose  
23 conditions are life-threatening and require comprehensive care and constant monitoring. It is usually  
24 administered in specially equipped units of a health care facility. Year introduced: 1992  
25  
26

27 **Internal Medicine:** A medical specialty concerned with the diagnosis and treatment of diseases of the  
28 internal organ systems of adults. By exploding this term, we do include MeSH terms found below it in  
29 the MeSH hierarchy as follows: Cardiology; Cardiac electrophysiology; Endocrinology;  
30 Gastroenterology; Hematology; Transfusion Medicine; Infectious Disease Medicine; Medical  
31 Oncology Radiation; Oncology; Nephrology; Pulmonary Medicine; Rheumatology; Sleep Medicine  
32 Specialty.  
33  
34  
35  
36

37 **Medical Audit:** A detailed review and evaluation of selected clinical records by qualified professional  
38 personnel for evaluating quality of medical care. Year introduced: 1968  
39  
40

41 **Mental Disorders:** Psychiatric illness or diseases manifested by breakdowns in the adaptational  
42 process expressed primarily as abnormalities of thought, feeling, and behavior producing either  
43 distress or impairment of function. Year introduced: use pre-explosion 1974-1997  
44  
45  
46

47 **Mental Health Services:** Organized services to provide **mental health** care. Year introduced: 1967  
48 Mental Health: The state wherein the person is well adjusted. Year introduced: 1967  
49  
50

51 **Orthopedics:** A surgical specialty which utilizes medical, surgical, and physical methods to treat and  
52 correct deformities, diseases, and injuries to the skeletal system, its articulations, and associated  
53 structures.  
54  
55  
56  
57  
58  
59  
60

PA-SCer systematic review narrative synthesis: first draft T&O and internal med 160806

1  
2  
3  
4  
5 **Outcome and Process Assessment (Health Care):** Evaluation procedures that focus on both the  
6 outcome or status (OUTCOMES ASSESSMENT) of the patient at the end of an episode of care -  
7 presence of symptoms, level of activity, and mortality; and the process (ASSESSMENT, PROCESS) -  
8 what is done for the patient diagnostically and therapeutically. Year introduced: 1979. By exploding  
9 this term, we do include MeSH terms found below it in the MeSH hierarchy as follows: Outcome  
10 Assessment (Health Care); Patient Outcome Assessment; Treatment Outcome; Process Assessment  
11 (Health Care)  
12  
13  
14  
15

16 **Outcome Assessment (Health Care):** Research aimed at assessing the quality and effectiveness of  
17 health care as measured by the attainment of a specified end result or outcome. Measures include  
18 parameters such as improved health, lowered morbidity or mortality, and improvement of abnormal  
19 states (such as elevated blood pressure). Year introduced: 1992  
20  
21  
22

23 **Outpatient Clinics, Hospital:** Organized services in a hospital which provide medical care on an  
24 outpatient basis. Year introduced: 1978  
25  
26

27 **Outpatients:** Persons who receive ambulatory care at an outpatient department or clinic without room  
28 and board being provided. Year introduced: 1991(1980)  
29  
30

31 **Pediatric Assistants:** Persons academically trained to provide medical care, under the supervision of  
32 a physician, to infants and children. Year introduced: 1991(1975)  
33  
34

35 **Physician Assistants:** Health professionals who practice medicine as members of a team with their  
36 supervising physicians. They deliver a broad range of medical and surgical services to diverse  
37 populations in rural and urban settings. Duties may include physical exams, diagnosis and treatment  
38 of disease, interpretation of tests, assist in surgery, and prescribe medications. (from  
39 <http://www.aapa.org/about-pas> accessed 21/4/2011) Year introduced: 1995  
40  
41  
42

43 **Physicians, Family:** Those physicians who have completed the education requirements specified by  
44 the American Academy of Family Physicians. Year introduced: 1974(1972)  
45  
46

47 **Physicians, Primary Care:** Providers of initial care for patients. These PHYSICIANS refer patients  
48 when appropriate for secondary or specialist care. Year introduced: 2011  
49  
50

51 **Preventive medicine:** A medical specialty primarily concerned with prevention of disease  
52 (PRIMARY PREVENTION) and the promotion and preservation of health in the individual. By  
53 exploding this term, we do include MeSH terms found below it in the MeSH hierarchy as follows:  
54 Environmental Medicine; Occupational Medicine; Preventive Psychiatry.  
55  
56  
57  
58  
59  
60

PA-SCer systematic review narrative synthesis: first draft T&O and internal med 160806

1  
2  
3  
4  
5 **Primary Health Care:** Care which provides integrated, accessible health care services by clinicians  
6 who are accountable for addressing a large majority of personal health care needs, developing a  
7 sustained partnership with patients, and practicing in the context of family and community. (JAMA  
8 1995;273(3):192) Year introduced: 1974(1972).  
9  
10

11 **Program Evaluation:** Studies designed to assess the efficacy of programs. They may include the  
12 evaluation of cost-effectiveness, the extent to which objectives are met, or impact. Year introduced:  
13 1989. By exploding this term, we do include MeSH terms found below it in the MeSH hierarchy as  
14 follows: benchmarking.  
15  
16  
17

18 **Psychiatry:** The medical science that deals with the origin, diagnosis, prevention, and treatment of  
19 mental disorders.  
20  
21  
22

23 **Traumatology:** The medical specialty which deals with wounds and injuries as well as resulting  
24 disability and disorders from physical traumas.  
25  
26

27 **Treatment Outcome:** Evaluation undertaken to assess the results or consequences of management  
28 and procedures used in combating disease in order to determine the efficacy, effectiveness, safety, and  
29 practicability of these interventions in individual cases or series. Year introduced: 1992  
30  
31  
32  
33  
34  
35  
36  
37  
38  
39  
40  
41  
42  
43  
44  
45  
46  
47  
48  
49  
50  
51  
52  
53  
54  
55  
56  
57  
58  
59  
60

PA-SCer systematic review narrative synthesis: first draft T&O and internal med 160806

SUPPLEMENTARY FILE 2: DEFINITIONS used in this review

As this review question contained broad terms, these were defined at the outset, as follows:

- **Physician Associates:** trained in a medical model to work in all settings and undertake physical examinations, investigations, diagnosis, treatment, and prescribe within their scope of practice as agreed with their supervising doctor.[1,2] Physician Associates are sometimes described within the term ‘mid-level providers’ in developed economies: ‘.....the term mid-level practitioner means an individual practitioner, other than a physician, dentist, veterinarian, or podiatrist, who is licensed, registered, or otherwise permitted by the United States or the jurisdiction in which he/she practices, to dispense a controlled substance in the course of professional practice. Examples of mid-level practitioners include, but are not limited to, health-care providers such as nurse practitioners, nurse midwives, nurse anaesthetists, clinical nurse specialists and physician assistants who are authorized to dispense controlled substances by the state in which they practice.’ [3] While this term is contested as an appropriate umbrella term due to its hierarchical connotations [4,5] and international variation in usage,[6] it appears in the literature regarding Physician Associates.
- **Impact:** using the broad headings of the components of quality as suggested by Maxwell (1992),[7] augmenting that of Donabedian,[8] that is, effectiveness, efficiency, acceptability, access, equity and relevance; further consolidated in the aspects of quality set out in the NHS Next stage Review (2008)[9]: patient safety, patient experience and effectiveness of care.
- **Specialties most frequently employing PAs in England:**
  - acute medicine  
‘Acute medicine is the part of general (internal) medicine concerned with the immediate and early specialist management of adult patients who present to, or from within, hospitals as urgencies or emergencies’.[10]
  - care of the elderly  
‘...geriatric medicine is mainly concerned with people over the age of 75, although many ‘geriatric’ patients are much older. However, geriatric medicine in the UK is broadly from the age of 65 onwards. Frail older people are those with multiple diseases, that often includes dementia, with reduced functional reserve who tend to present to hospital with ‘geriatric syndromes’ such as falls, confusion and immobility.’[11]
  - emergency medicine  
‘Emergency medicine is a field of practice based on the knowledge and skills required for the prevention, diagnosis and management of acute and urgent aspects of illness and injury affecting patients of all age groups with a full spectrum of episodic undifferentiated physical and behavioural disorders; it further encompasses an understanding of the development of

PA-SCer systematic review narrative synthesis: first draft T&O and internal med 160806

prehospital and in hospital emergency medical systems and the skills necessary for this development.' [12]

– mental health /psychiatry

'Mental health problems can take many forms including depression, schizophrenia, eating disorders, anxieties, phobias, drug and alcohol abuse, post-traumatic stress disorder, and dementia.' [13] Psychiatry includes the sub specialties of child and adolescent, forensic, general adult, old age, psychotherapy and psychiatry of learning disabilities. [14]

- trauma and orthopaedics

Trauma and orthopaedics is an area of surgery concerned with injuries and conditions that affect the musculoskeletal system (the bones, joints, ligaments, tendons, muscles and nerves).[15]

## References

1. Department of Health. The Competence and Curriculum Framework for the Physician Assistant. London: Department of Health 2006.
2. Physician Assistant Managed Voluntary Register The Revised Competence and Curriculum Framework for the Physician Assistant. 2012 Accessed at <http://www.ukapa.co.uk/files/CCF-27-03-12-for-PAMVR.pdf>.
3. United States Department of Justice. (n.d.). Mid-level practitioners authorization by state. Retrieved from <http://www.deadiversion.usdoj.gov/drugreg/practioners/index.html>
4. Bishop CS. Advanced Practitioners Are Not Mid-Level Providers. Vol 3 No 5 Sep/Oct 2012 287-8. J Adv Pract Oncol AdvancedPractitioner.com  
<http://www.advancedpractitioner.com/media/152572/287.pdf>
5. Pappas MD. Stop calling nurse practitioners mid-level providers. 2014 Kevin MD.com.  
<http://www.kevinmd.com/blog/2014/07/stop-calling-nurse-practitioners-mid-level-providers.html>. Accessed 24 November 2015.
6. Brown A, Cornetto G, Cumbi A, de Pinho H, Kamwendo F, Lehmann U et al. Mid-level health providers: a promising resource. Rev Peru Med Exp Salud Publica. 2011; 28(2): 308-15.
7. Maxwell R. Dimensions of quality revisited: from thought to action. Quality in Health Care 1992;1:171-177.
8. Donabedian A. The quality of care. How can it be assessed? JAMA 1988;260:1743-8.  
<http://dx.doi.org/10.1001/jama.1988.03410120089033>

PA-SCer systematic review narrative synthesis: first draft T&O and internal med 160806

- 1  
2  
3 9. Department of Health. High Quality Care For All NHS Next Stage Review Final Report. 2008.  
4 [https://www.gov.uk/government/uploads/system/uploads/attachment\\_data/file/228836/7432.pdf](https://www.gov.uk/government/uploads/system/uploads/attachment_data/file/228836/7432.pdf)  
5  
6 Accessed 10 December 2015.
- 7  
8 10. Royal College of Physicians. *Acute medical care; the right person, in the right setting—first time*.  
9 Report of a working party. London: RCP, 2007.
- 10  
11 11. Conroy S, Cooper N. Executive summary. British Geriatrics Society, 2012.  
12 <http://www.bgs.org.uk/index.php/topresources/publicationfind/goodpractice/44-gpgacutecare%20>  
13  
14 Accessed 24 Nov 2015.
- 15  
16 12. International Federation for Emergency Medicine. About IFEM IFEM Definition of Emergency  
17  
18 Medicine. 2008. [http://www.ifem.cc/About\\_IFEM.aspx](http://www.ifem.cc/About_IFEM.aspx) Accessed Nov 24 2015.
- 19  
20 13. Royal College of Psychiatrists. Glossary of Terms Professionals involved in the care of people  
21  
22 with mental health problems. 2015.  
23 <http://www.rcpsych.ac.uk/healthadvice/moreinformation/definitions/professionalsinpsychiatry.aspx>  
24  
25 [x. Accessed 10 December](http://www.rcpsych.ac.uk/healthadvice/moreinformation/definitions/professionalsinpsychiatry.aspx) 2015.
- 26  
27 14. Royal College of Psychiatrists. A Career in Psychiatry. 2015.  
28 <http://www.rcpsych.ac.uk/discoverpsychiatry/acareerinpsychiatry.aspx> Accessed 10 December  
29  
30 2015.
- 31  
32 15. NHS Choices. Trauma and Orthopaedics (Orthopaedic Surgery) 2015.  
33  
34 <http://www.nhs.uk/Conditions/orthopaedics/Pages/Introduction.aspx>  
35  
36  
37  
38  
39  
40  
41  
42  
43  
44  
45  
46  
47  
48  
49  
50  
51  
52  
53  
54  
55  
56  
57  
58  
59  
60

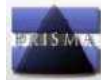

# PRISMA 2009 Checklist

| Section/topic                      | #  | Checklist item                                                                                                                                                                                                                                                                                              | Reported on page # |
|------------------------------------|----|-------------------------------------------------------------------------------------------------------------------------------------------------------------------------------------------------------------------------------------------------------------------------------------------------------------|--------------------|
| <b>TITLE</b>                       |    |                                                                                                                                                                                                                                                                                                             |                    |
| Title                              | 1  | Identify the report as a systematic review, meta-analysis, or both.                                                                                                                                                                                                                                         | 1                  |
| <b>ABSTRACT</b>                    |    |                                                                                                                                                                                                                                                                                                             |                    |
| Structured summary                 | 2  | Provide a structured summary including, as applicable: background; objectives; data sources; study eligibility criteria, participants, and interventions; study appraisal and synthesis methods; results; limitations; conclusions and implications of key findings; systematic review registration number. | 4-5                |
| <b>INTRODUCTION</b>                |    |                                                                                                                                                                                                                                                                                                             |                    |
| Rationale                          | 3  | Describe the rationale for the review in the context of what is already known.                                                                                                                                                                                                                              | 6-7                |
| Objectives                         | 4  | Provide an explicit statement of questions being addressed with reference to participants, interventions, comparisons, outcomes, and study design (PICOS).                                                                                                                                                  | 9                  |
| <b>METHODS</b>                     |    |                                                                                                                                                                                                                                                                                                             |                    |
| Protocol and registration          | 5  | Indicate if a review protocol exists, if and where it can be accessed (e.g., Web address), and, if available, provide registration information including registration number.                                                                                                                               | 8 + reference      |
| Eligibility criteria               | 6  | Specify study characteristics (e.g., PICOS, length of follow-up) and report characteristics (e.g., years considered, language, publication status) used as criteria for eligibility, giving rationale.                                                                                                      | 9                  |
| Information sources                | 7  | Describe all information sources (e.g., databases with dates of coverage, contact with study authors to identify additional studies) in the search and date last searched.                                                                                                                                  | 8                  |
| Search                             | 8  | Present full electronic search strategy for at least one database, including any limits used, such that it could be repeated.                                                                                                                                                                               | Supplementary file |
| Study selection                    | 9  | State the process for selecting studies (i.e., screening, eligibility, included in systematic review, and, if applicable, included in the meta-analysis).                                                                                                                                                   | 8-10               |
| Data collection process            | 10 | Describe method of data extraction from reports (e.g., piloted forms, independently, in duplicate) and any processes for obtaining and confirming data from investigators.                                                                                                                                  | 10                 |
| Data items                         | 11 | List and define all variables for which data were sought (e.g., PICOS, funding sources) and any assumptions and simplifications made.                                                                                                                                                                       | 10                 |
| Risk of bias in individual studies | 12 | Describe methods used for assessing risk of bias of individual studies (including specification of whether this was done at the study or outcome level), and how this information is to be used in any data synthesis.                                                                                      | 10                 |
| Summary measures                   | 13 | State the principal summary measures (e.g., risk ratio, difference in means).                                                                                                                                                                                                                               | 10-11              |
| Synthesis of results               | 14 | Describe the methods of handling data and combining results of studies, if done, including measures of consistency (e.g., $I^2$ ) for each meta-analysis.                                                                                                                                                   | 10-11              |

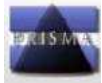

# PRISMA 2009 Checklist

Page 1 of 2

| Section/topic                 | #  | Checklist item                                                                                                                                                                                           | Reported on page # |
|-------------------------------|----|----------------------------------------------------------------------------------------------------------------------------------------------------------------------------------------------------------|--------------------|
| Risk of bias across studies   | 15 | Specify any assessment of risk of bias that may affect the cumulative evidence (e.g., publication bias, selective reporting within studies).                                                             | 10                 |
| Additional analyses           | 16 | Describe methods of additional analyses (e.g., sensitivity or subgroup analyses, meta-regression), if done, indicating which were pre-specified.                                                         | n/a                |
| <b>RESULTS</b>                |    |                                                                                                                                                                                                          |                    |
| Study selection               | 17 | Give numbers of studies screened, assessed for eligibility, and included in the review, with reasons for exclusions at each stage, ideally with a flow diagram.                                          | 11+figure1         |
| Study characteristics         | 18 | For each study, present characteristics for which data were extracted (e.g., study size, PICOS, follow-up period) and provide the citations.                                                             | Table 1            |
| Risk of bias within studies   | 19 | Present data on risk of bias of each study and, if available, any outcome level assessment (see item 12).                                                                                                | Table 2 + Figure2  |
| Results of individual studies | 20 | For all outcomes considered (benefits or harms), present, for each study: (a) simple summary data for each intervention group (b) effect estimates and confidence intervals, ideally with a forest plot. | Table 1 + 2        |
| Synthesis of results          | 21 | Present results of each meta-analysis done, including confidence intervals and measures of consistency.                                                                                                  | n/a                |
| Risk of bias across studies   | 22 | Present results of any assessment of risk of bias across studies (see Item 15).                                                                                                                          | 36+Figure 2        |
| Additional analysis           | 23 | Give results of additional analyses, if done (e.g., sensitivity or subgroup analyses, meta-regression [see Item 16]).                                                                                    | n/a                |
| <b>DISCUSSION</b>             |    |                                                                                                                                                                                                          |                    |
| Summary of evidence           | 24 | Summarize the main findings including the strength of evidence for each main outcome; consider their relevance to key groups (e.g., healthcare providers, users, and policy makers).                     | 44-45              |
| Limitations                   | 25 | Discuss limitations at study and outcome level (e.g., risk of bias), and at review-level (e.g., incomplete retrieval of identified research, reporting bias).                                            | 46-47              |
| Conclusions                   | 26 | Provide a general interpretation of the results in the context of other evidence, and implications for future research.                                                                                  | 47-49              |
| <b>FUNDING</b>                |    |                                                                                                                                                                                                          |                    |
| Funding                       | 27 | Describe sources of funding for the systematic review and other support (e.g., supply of data); role of funders for the systematic review.                                                               | 51                 |

From: Moher D, Liberati A, Tetzlaff J, Altman DG, The PRISMA Group (2009). Preferred Reporting Items for Systematic Reviews and Meta-Analyses: The PRISMA Statement. PLoS Med 6(7): e1000097. doi:10.1371/journal.pmed1000097

For peer review only - <http://bmjopen.bmj.com/site/about/guidelines.xhtml>

For more information, visit: [www.prisma-statement.org](http://www.prisma-statement.org)



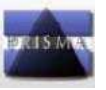

# PRISMA 2009 Checklist

- 1
- 2
- 3
- 4
- 5
- 6
- 7
- 8
- 9
- 10
- 11
- 12
- 13
- 14
- 15
- 16
- 17
- 18
- 19
- 20
- 21
- 22
- 23
- 24
- 25
- 26
- 27
- 28
- 29
- 30
- 31
- 32
- 33
- 34
- 35
- 36
- 37
- 38
- 39
- 40
- 41
- 42
- 43
- 44
- 45
- 46
- 47

For peer review only
